# Supplementary material for: Sustainable synthesis of pyrazoles using alcohols as the primary feedstock by an iron catalyzed tandem C–C and C–N coupling approach
Source: Royal Society of Chemistry journal article supplement (doi:10.1039/d2qo01196d), 2022-01-01
Supplement: d2qo01196d1.pdf [file d2qo01196d1.pdf]

## Supporting Information

# **Sustainable synthesis of pyrazoles using alcohols as the primary feedstock by an iron catalyzed tandem C-C and C-N coupling approach**

Rakesh Mondal, Amit Kumar Guin, Subhasree Pal, Sucheta Mondal, and Nanda D. Paul\*

Department of Chemistry, Indian Institute of Engineering Science and Technology, Shibpur,  
Botanic Garden, Howrah 711103, India

E-mail: [ndpaul@gmail.com](mailto:ndpaul@gmail.com); [ndpaul2014@chem.iiests.ac.in](mailto:ndpaul2014@chem.iiests.ac.in)

| <b>Table of Contents</b>                         |                                                                              | <b>Page No.</b> |
|--------------------------------------------------|------------------------------------------------------------------------------|-----------------|
| Experimental Section                             |                                                                              | S3              |
| <b>Figure S1</b>                                 | Detection of H <sub>2</sub> O <sub>2</sub>                                   | S3–S4           |
| <b>Figure S2</b>                                 | IR spectroscopic analysis of the reaction mixture                            | S5              |
| Characterization Data of the Isolated Compounds. |                                                                              | S6–S13          |
| <b>Figure S3-S78</b>                             | Copies of <sup>1</sup> H, <sup>13</sup> C, and <sup>19</sup> F NMR spectra   | S14–S54         |
| <b>Figure S79</b>                                | HRMS analysis of the reaction mixture for the detection of adducts <b>13</b> | S55             |
| <b>Table S1</b>                                  | Unsuccessful substrates scope                                                | S55             |
| References                                       |                                                                              | S56             |

## Experimental Section.

**General Information.** Toluene, xylene, 1,4-dioxane, THF, and all other solvents used in this work were distilled and dried following the standard procedures. All other chemicals were used as received from the different commercial suppliers without further purification. Merck 60 F254 silica gel plate (0.25 mm thickness), Merck silica gel-G and Merck 60 silica gel (60–120 mesh) were used for analytical TLC and column chromatography. All ESI-MS were recorded on a micro mass Q-TOF mass spectrometer, and the NMR spectra were recorded on Bruker Avance-400 spectrometer. Tetramethylsilane (TMS) was used as the internal standard.

**Catalyst Synthesis.** The catalysts **1** and **2** were prepared following our previously reported article.<sup>1</sup>

**General Procedure for 1,3,5-triphenyl-(1H)-pyrazole Synthesis (path-A).** 3.0 mol% **1**, 1.0 mmol of aryl hydrazine, and 0.5 equiv. <sup>t</sup>BuOK were added to an oven-dried 35 mL ace pressure tube containing a magnetic bar under air. 2.0 mmol of the respective primary and secondary alcohols dissolved in 4.0 mL of dry toluene were added, and the tube was tightly capped with a PTFE screw cap. The sealed tube containing the reaction mixture was then placed in a preheated oil bath at 100 °C. The reaction was continued for 24 h. After completion of the reaction, the solvent and the volatiles were evaporated under vacuum, and the concentrated reaction mixture was purified by silica gel column chromatography using hexane/ethyl acetate (19:1) as the eluent.

**General Procedure for 1,3,5-triphenyl-(1H)-pyrazole Synthesis (path-B).** 3.0 mol% **1**, 1.0 mmol of aryl hydrzine, and 0.5 equiv. <sup>t</sup>BuOK were added to an oven-dried 35 mL ace pressure tube containing a magnetic bar under air. 2.0 mmol of the respective primary alcohols and aryl alkynes dissolved in 4.0 mL of dry toluene were added, and the tube was tightly capped with a PTFE screw cap. The sealed tube containing the reaction mixture was then placed in a preheated oil bath at 100 °C. The reaction was continued for 24 h. After completion of the reaction, the solvent and the volatiles were evaporated under vacuum, and the concentrated reaction mixture was purified by silica gel column chromatography using hexane/ethyl acetate (19:1) as the eluent.

**Spectrophotometric Detection of Hydrogen Peroxide During the 1-Catalyzed Synthesis of pyrazoles.**<sup>1</sup> The formation of H<sub>2</sub>O<sub>2</sub> during catalytic alcohol oxidation reaction was detected spectrophotometrically by monitoring the gradual rise of the characteristic

absorption band at 350 nm for  $I_3^-$ . **1**-catalyzed dehydrogenative functionalization of alcohols to **7a** was performed in an oven-dried ace pressure tube containing a magnetic stir bar, 2.0 mmol of benzyl alcohol (**4a**), and 1-phenyl ethanol (**5a**) (**path-A**) or 1-phenyl acetylene (**6a**) (**path-B**), 1.0 mmol of phenylhydrazine (**3a**), 3.0 mol% of catalyst **1**, and 0.5 equiv.  $t$ BuOK in 4 mL of dry toluene. The reaction mixture was heated at 100 °C for 24 h. To it, 10 mL of distilled water was added. Next, the whole solution was extracted with dichloromethane, and the separated aqueous layer was further acidified using concentrated  $H_2SO_4$  to maintain pH 2 to stop any additional oxidation. Subsequently, 1.0 mL of a 10% solution of KI and a few drops of a 3% ammonium molybdate solution were added. Then the in-situ formed hydrogen peroxide oxidizes  $I^-$  to molecular iodine ( $I_2$ ), which upon reaction with excess  $I^-$  generated  $I_3^-$  following the reaction sequences below:

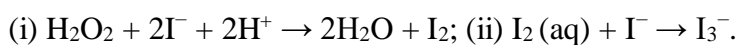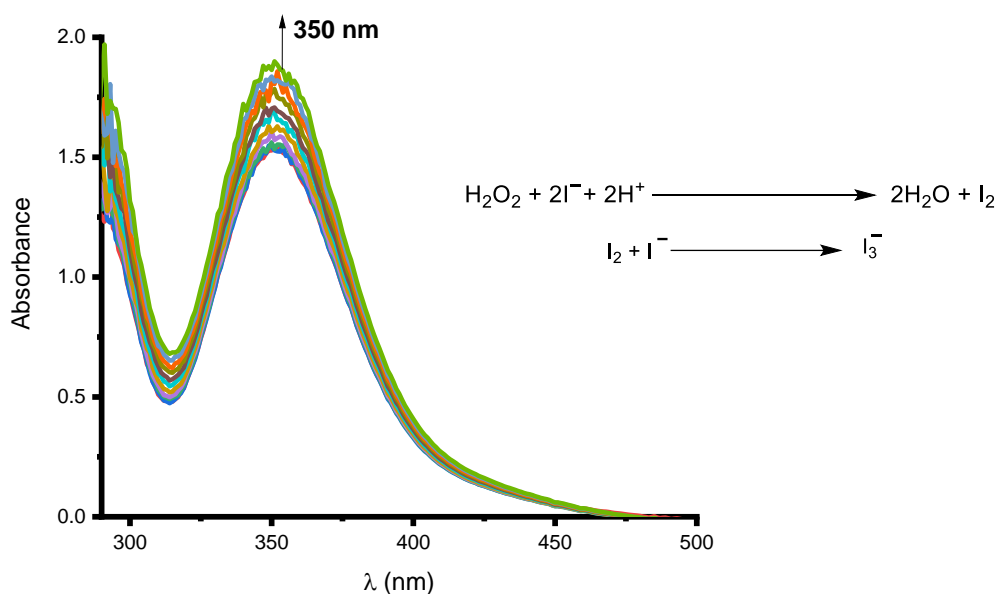

**Figure S1.** Detection of  $H_2O_2$ . Absorption spectral changes during formation of  $I_3^-$  in the presence of  $H_2O_2$ .

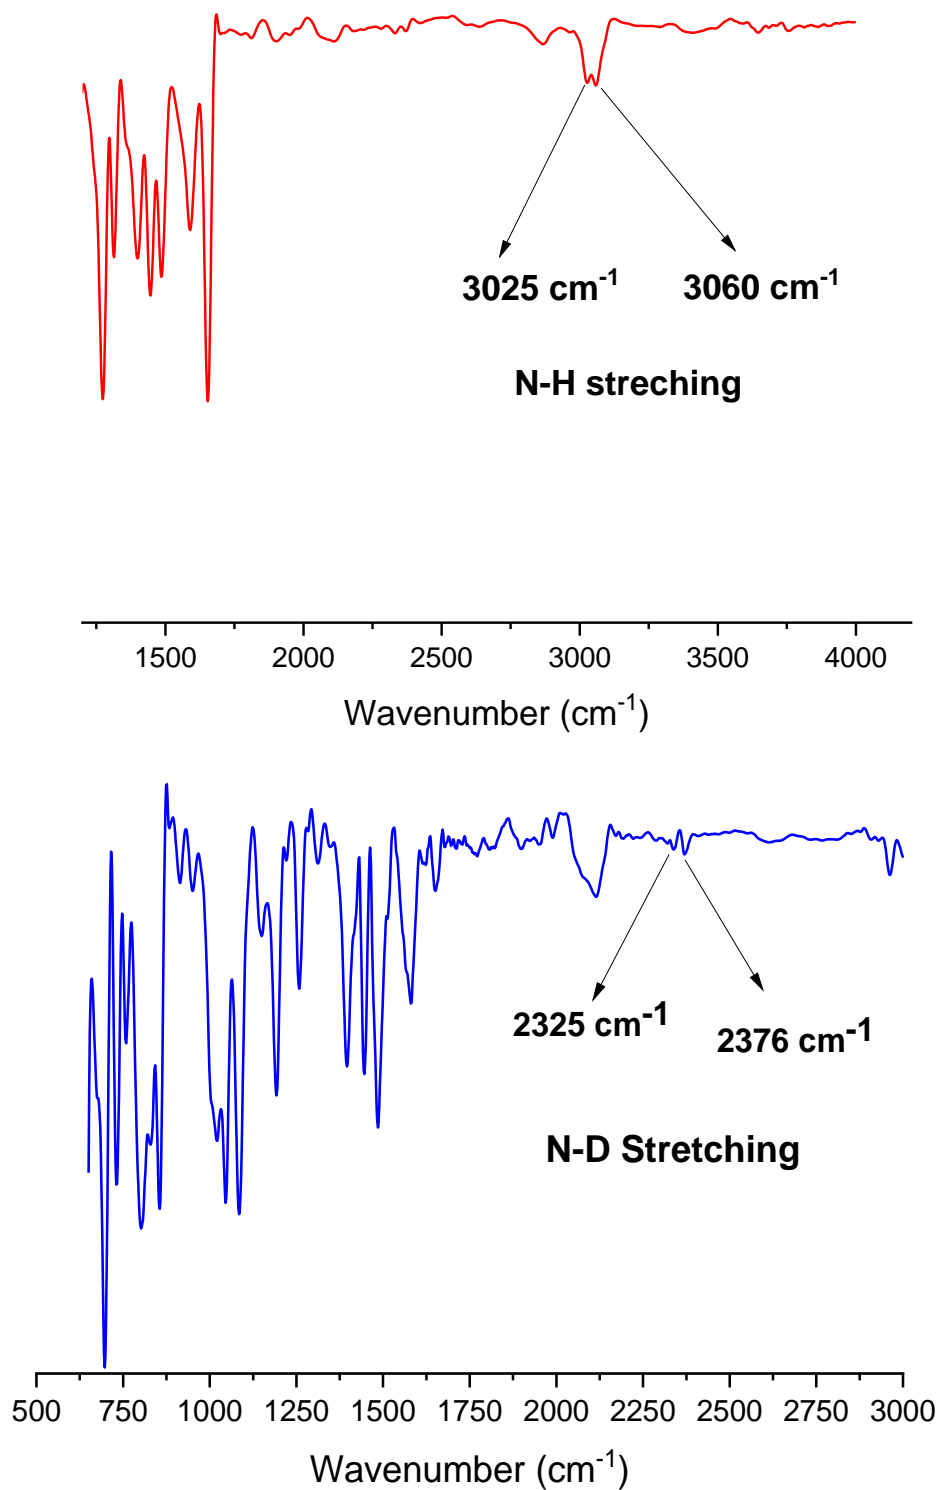

**Figure S2.** IR spectroscopic analysis of the reaction mixture (detection of azo/hydrazo redox couple).

### Characterization Data of the Isolated Compounds.

**1,3,5-triphenyl-1H-pyrazole (7a).** Purification by column chromatography (silica gel, hexane/ethyl acetate, 19:1). White solid, Yield: Path A: 243 mg, 82%; Path B: 249 mg, 84%. <sup>1</sup>H NMR (400 MHz, CDCl<sub>3</sub>): δ 7.96 (d, *J* = 8.0 Hz, 2H), 7.48–7.32 (m, 13H), 6.86 (s, 1H) ppm. <sup>13</sup>C {<sup>1</sup>H} NMR (100 MHz, CDCl<sub>3</sub>): δ 152.0, 144.4, 140.1, 133.0, 130.6, 128.9, 128.7, 128.7, 128.5, 128.3, 128.0, 127.4, 125.8, 125.3, 105.2 ppm. HRMS (ESI) *m/z*: [M+H]<sup>+</sup> Calcd. for [C<sub>21</sub>H<sub>17</sub>N<sub>2</sub>]<sup>+</sup> 297.1386; found = 297.1384.

**1,3-diphenyl-5-(*o*-tolyl)-1H-pyrazole (7b).** Purification by column chromatography (silica gel, hexane/ethyl acetate, 19:1). White solid, Yield: Path A: 257 mg, 83%; Path B: 264 mg, 85%. <sup>1</sup>H NMR (400 MHz, CDCl<sub>3</sub>): δ 7.96 (d, *J* = 8.0 Hz, 2H), 7.46 (t, *J* = 8.0 Hz, 2H), 7.39–7.33 (m, 3H), 7.29–1.24 (m, 7H), 6.91 (s, 1H), 2.07 (s, 3H) ppm. <sup>13</sup>C {<sup>1</sup>H} NMR (100 MHz, CDCl<sub>3</sub>): δ 152.4, 143.3, 140.0, 136.2, 132.7, 130.8, 130.6, 129.3, 128.8, 128.8, 128.5, 128.2, 127.9, 127.3, 125.8, 125.2, 108.2, 21.3 ppm. [M+H]<sup>+</sup> Calcd. for [C<sub>22</sub>H<sub>19</sub>N<sub>2</sub>]<sup>+</sup> 311.1543; found = 311.1542.

**5-(3-methoxyphenyl)-1,3-diphenyl-1H-pyrazole (7c).** Purification by column chromatography (silica gel, hexane/ethyl acetate, 19:1). White solid, Yield: Path A: 261 mg, 80%; Path B: 271 mg, 83%. <sup>1</sup>H NMR (400 MHz, CDCl<sub>3</sub>): δ 7.95 (d, *J* = 8.0 Hz, 2H), 7.47–7.30 (m, 8H), 7.24–7.22 (m, 1H), 6.89–6.82 (m, 4H), 3.69 (s, 1H) ppm. <sup>13</sup>C {<sup>1</sup>H} NMR (100 MHz, CDCl<sub>3</sub>): δ 159.9, 151.8, 144.4, 140.0, 129.7, 128.9, 128.7, 128.5, 128.3, 127.5, 125.3, 118.4, 114.2, 110.8, 105.4, 55.4 ppm. [M+H]<sup>+</sup> Calcd. for [C<sub>22</sub>H<sub>18</sub>N<sub>2</sub>NaO]<sup>+</sup> 349.1311; found = 349.1309.

**1,3-diphenyl-5-(*p*-tolyl)-1H-pyrazole (7d).** Purification by column chromatography (silica gel, hexane/ethyl acetate, 19:1). White solid, Yield: Path A: 267 mg, 86%; Path B: 273 mg, 88%. <sup>1</sup>H NMR (400 MHz, CDCl<sub>3</sub>): δ 7.94 (d, *J* = 8.0 Hz, 2H), 7.46–7.31 (m, 8H), 7.20–7.13 (m, 4H), 6.81 (s, 1H), 2.37 (s, 3H) ppm. <sup>13</sup>C {<sup>1</sup>H} NMR (100 MHz, CDCl<sub>3</sub>): δ 151.9, 144.4, 140.2, 138.2, 133.1, 129.1, 128.8, 128.6, 127.9, 127.6, 127.3, 125.8, 125.3, 104.9, 21.2 ppm. [M+H]<sup>+</sup> Calcd. for [C<sub>22</sub>H<sub>19</sub>N<sub>2</sub>]<sup>+</sup> 311.1543; found = 311.1541.

**5-(4-fluorophenyl)-1,3-diphenyl-1H-pyrazole (7e).** Purification by column chromatography (silica gel, hexane/ethyl acetate, 19:1). White solid, Yield: Path A: 204 mg, 65%; Path B: 214 mg, 68%. <sup>1</sup>H NMR (400 MHz, CDCl<sub>3</sub>): δ 7.94 (d, *J* = 8.0 Hz, 2H), 7.47–7.43 (m, 2H), 7.38–7.32 (m, 6H), 7.28–7.25 (m, 2H), 7.05–7.00 (m, 2H), 6.81 (s, 1H) ppm. <sup>13</sup>C {<sup>1</sup>H} NMR (100 MHz, CDCl<sub>3</sub>): δ 163.0, 160.5, 152.0, 144.6, 136.1, 132.6, 130.2, 128.7 (d, *J* = 4.0 Hz), 128.6,

128.5, 128.2, 127.1 (d,  $J = 4.0$  Hz), 125.9, 115.9 (d,  $J = 8.0$  Hz), 105.2 ppm.  $^{19}\text{F}\{^1\text{H}\}$  NMR (376 MHz,  $\text{CDCl}_3$ ):  $\delta -112.6$  (s) ppm.  $[\text{M}+\text{H}]^+$  Calcd. for  $[\text{C}_{21}\text{H}_{16}\text{FN}_2]^+$  315.1292; found = 315.1290.

**5-(4-chlorophenyl)-1,3-diphenyl-1H-pyrazole (7f).** Purification by column chromatography (silica gel, hexane/ethyl acetate, 19:1). White solid, Yield: Path A: 228 mg, 69%; Path B: 234 mg, 71%.  $^1\text{H}$  NMR (400 MHz,  $\text{CDCl}_3$ ):  $\delta$  7.92 (d,  $J = 8.0$  Hz, 2H), 7.44 (t,  $J = 8.0$  Hz, 2H), 7.37–7.29 (m, 8H), 7.22–7.20 (m, 2H), 6.82 (s, 1H) ppm.  $^{13}\text{C}\{^1\text{H}\}$  NMR (100 MHz,  $\text{CDCl}_3$ ):  $\delta$  152.2, 144.4, 138.6, 132.9, 132.7, 130.4, 130.2, 129.0, 128.7, 128.6, 128.5, 128.1, 126.2, 125.7, 105.5 ppm.  $[\text{M}+\text{H}]^+$  Calcd. for  $[\text{C}_{21}\text{H}_{16}\text{ClN}_2]^+$  331.0997; found = 331.0996.

**5-(4-bromophenyl)-1,3-diphenyl-1H-pyrazole (7g).** Purification by column chromatography (silica gel, hexane/ethyl acetate, 19:1). White solid, Yield: Path A: 263 mg, 70%; Path B: 274 mg, 73%.  $^1\text{H}$  NMR (400 MHz,  $\text{CDCl}_3$ ):  $\delta$  7.73–7.69 (m, 5H), 7.48–7.38 (m, 7H), 7.28 (s, 2H), 6.85 (s, 1H) ppm.  $^{13}\text{C}\{^1\text{H}\}$  NMR (100 MHz,  $\text{CDCl}_3$ ):  $\delta$  152.2, 144.4, 139.0, 132.0, 128.7, 128.7, 128.6, 128.6, 128.2, 126.5, 125.8, 121.0, 105.6 ppm.  $[\text{M}+\text{H}]^+$  Calcd. for  $[\text{C}_{21}\text{H}_{16}\text{BrN}_2]^+$  375.0491; found = 375.0490.

**1,3-diphenyl-5-(4-(trifluoromethyl)phenyl)-1H-pyrazole (7h).** Purification by column chromatography (silica gel, hexane/ethyl acetate, 19:1). White solid, Yield: Path A: 240 mg, 66%; Path B: 248 mg, 68%.  $^1\text{H}$  NMR (400 MHz,  $\text{CDCl}_3$ ):  $\delta$  7.93 (d,  $J = 8.0$  Hz, 2H), 7.61 (d,  $J = 8.0$  Hz, 2H), 7.52–7.44 (m, 4H), 7.39–7.38 (m, 4H), 7.31–7.29 (m, 2H), 6.85 (s, 1H) ppm.  $^{13}\text{C}\{^1\text{H}\}$  NMR (100 MHz,  $\text{CDCl}_3$ ):  $\delta$  152.6, 144.7, 142.6, 132.3–132.2 (m,  $J = 6.0$  Hz), 130.0, 129.9, 128.9–128.7 (q,  $J = 4.0$  Hz), 128.5, 127.7, 126.1–125.9 (q,  $J = 4.0$  Hz), 125.2, 125.9, 124.9, 124.3, 122.7, 106.2 ppm.  $^{19}\text{F}\{^1\text{H}\}$  NMR (376 MHz,  $\text{CDCl}_3$ ):  $\delta -62.3$  (s) ppm.  $[\text{M}+\text{H}]^+$  Calcd. for  $[\text{C}_{21}\text{H}_{16}\text{N}_2\text{F}_3]^+$  365.1260; found = 365.1258.

**5-(3-nitrophenyl)-1,3-diphenyl-1H-pyrazole (7i).** Purification by column chromatography (silica gel, hexane/ethyl acetate, 19:1). White solid, Yield: Path A: 215 mg, 63%; Path B: 229 mg, 67%.  $^1\text{H}$  NMR (400 MHz,  $\text{CDCl}_3$ ):  $\delta$  8.21–8.17 (m, 2H), 7.93 (d,  $J = 8.0$  Hz, 2H), 7.53–7.35 (m, 10H), 6.95 (s, 1H) ppm.  $^{13}\text{C}\{^1\text{H}\}$  NMR (100 MHz,  $\text{CDCl}_3$ ):  $\delta$  152.3, 148.3, 141.8, 139.5, 134.3, 132.5, 132.1, 129.5, 129.3, 128.7, 128.3, 128.2, 125.8, 125.4, 123.4, 123.0, 105.8 ppm.  $[\text{M}+\text{H}]^+$  Calcd. for  $[\text{C}_{21}\text{H}_{15}\text{N}_3\text{NaO}_2]^+$  364.1056; found = 364.1054.

**2-(1,3-diphenyl-1H-pyrazol-5-yl)pyridine (7j).** Purification by column chromatography (silica gel, hexane/ethyl acetate, 19:1). White solid, Yield: Path A: 208 mg, 70% (from **2j** and **3a**); Path B: 217 mg, 73%.  $^1\text{H}$  NMR (400 MHz,  $\text{CDCl}_3$ ):  $\delta$  8.62 (d,  $J = 8.0$  Hz, 1H), 7.94 (d,  $J$

= 8.0 Hz, 2H), 7.62–7.58 (m, 1H), 7.43–7.33 (m, 9H), 7.23–7.13 (m, 2H) ppm.  $^{13}\text{C}\{^1\text{H}\}$  NMR (100 MHz,  $\text{CDCl}_3$ ):  $\delta$  152.1, 149.8, 149.5, 143.6, 140.3, 136.2, 132.9, 129.0, 128.6, 128.0, 127.7, 125.8, 125.4, 123.5, 122.8, 106.2 ppm.  $[\text{M}+\text{H}]^+$  Calcd. for  $[\text{C}_{20}\text{H}_{15}\text{N}_3\text{Na}]^+$  320.1158; found = 320.1155.

**1,3-diphenyl-5-(thiophen-2-yl)-1H-pyrazole (7k).** Purification by column chromatography (silica gel, hexane/ethyl acetate, 19:1). White solid, Yield: Path A: 218 mg, 72%; Path B: 224 mg, 74%.  $^1\text{H}$  NMR (400 MHz,  $\text{CDCl}_3$ ):  $\delta$  7.92 (d,  $J = 8.0$  Hz, 2H), 7.48–7.42 (m, 7H), 7.37–7.29 (m, 2H), 6.96 (t,  $J = 4.0$  Hz, 1H), 6.89–6.86 (m, 2H) ppm.  $^{13}\text{C}\{^1\text{H}\}$  NMR (100 MHz,  $\text{CDCl}_3$ ):  $\delta$  151.9, 139.9, 138.2, 132.8, 131.4, 129.0, 128.7, 128.3, 128.1, 127.4, 127.3, 126.5, 126.3, 125.8, 105.0 ppm.  $[\text{M}+\text{H}]^+$  Calcd. for  $[\text{C}_{19}\text{H}_{15}\text{N}_2\text{S}]^+$  303.0950; found = 303.0947.

**1,5-diphenyl-3-(o-tolyl)-1H-pyrazole (8a).** Purification by column chromatography (silica gel, hexane/ethyl acetate, 19:1). White solid, Yield: Path A: 248 mg, 80%; Path B: 254 mg, 82%.  $^1\text{H}$  NMR (400 MHz,  $\text{CDCl}_3$ ):  $\delta$  7.70 (t,  $J = 4.0$  Hz, 1H), 7.39–7.28 (m, 13H), 6.68 (s, 1H), 2.60 (s, 3H) ppm.  $^{13}\text{C}\{^1\text{H}\}$  NMR (100 MHz,  $\text{CDCl}_3$ ):  $\delta$  152.4, 143.3, 140.0, 136.2, 132.7, 130.8, 130.6, 129.3, 128.8, 128.8, 128.5, 128.2, 127.9, 127.3, 125.8, 125.2, 108.2, 21.3 ppm.  $[\text{M}+\text{H}]^+$  Calcd. for  $[\text{C}_{22}\text{H}_{19}\text{N}_2]^+$  311.1543; found = 311.1540.

**3-(3-methoxyphenyl)-1,5-diphenyl-1H-pyrazole (8b).** Purification by column chromatography (silica gel, hexane/ethyl acetate, 19:1). White solid, Yield: Path A: 254 mg, 78%; Path B: 260 mg, 80%.  $^1\text{H}$  NMR (400 MHz,  $\text{CDCl}_3$ ):  $\delta$  7.50–7.49 (m, 2H), 7.37–7.28 (m, 11H), 6.92–6.89 (m, 1H), 6.82(s, 1H), 3.89 (s, 3H) ppm.  $^{13}\text{C}\{^1\text{H}\}$  NMR (100 MHz,  $\text{CDCl}_3$ ):  $\delta$  159.9, 151.8, 144.4, 139.9, 134.3, 130.4, 129.6, 128.9, 128.7, 128.5, 128.3, 127.5, 125.3, 118.4, 114.2, 110.8, 105.4, 55.4 ppm.  $[\text{M}+\text{H}]^+$  Calcd. for  $[\text{C}_{22}\text{H}_{19}\text{N}_2\text{O}]^+$  327.1492; found = 327.1489.

**3-(4-(tert-butyl)phenyl)-1,5-diphenyl-1H-pyrazole (8c).** Purification by column chromatography (silica gel, hexane/ethyl acetate, 19:1). White solid, Yield: Path A: 271 mg, 77%; Path B: 282 mg, 80%.  $^1\text{H}$  NMR (400 MHz,  $\text{CDCl}_3$ ):  $\delta$  7.85 (d,  $J = 8.0$  Hz, 1H), 7.46–7.29 (m, 13H), 6.80 (s, 1H), 1.36–1.32(m, 9H) ppm.  $^{13}\text{C}\{^1\text{H}\}$  NMR (100 MHz,  $\text{CDCl}_3$ ):  $\delta$  152.0, 151.0, 144.2, 140.1, 130.6, 130.2, 128.9, 128.7, 128.4, 128.2, 127.3, 125.8, 125.5, 125.4, 125.3, 105.1, 34.6, 31.3, 31.2 ppm.  $[\text{M}+\text{H}]^+$  Calcd. for  $[\text{C}_{25}\text{H}_{25}\text{N}_2]^+$  353.2012; found = 353.2010.

**3-(4-methoxyphenyl)-1,5-diphenyl-1H-pyrazole (8d).** Purification by column chromatography (silica gel, hexane/ethyl acetate, 19:1). White solid, Yield: Path A: 267 mg,



82%; Path B: 277 mg, 85%. <sup>1</sup>H NMR (400 MHz, CDCl<sub>3</sub>): δ 7.89 (d, *J* = 8.0 Hz, 2H), 7.41–7.32 (m, 10H), 7.01–6.99 (m, 2H), 6.79 (s, 1H), 3.88 (s, 3H) ppm. <sup>13</sup>C{<sup>1</sup>H} NMR (100 MHz, CDCl<sub>3</sub>): δ 151.8, 144.3, 140.2, 131.4, 130.7, 129.3, 128.8, 128.4, 128.5, 127.3, 127.1, 125.8, 125.3, 114.0, 104.8, 55.3 ppm. [M+H]<sup>+</sup> Calcd. for [C<sub>22</sub>H<sub>19</sub>N<sub>2</sub>O]<sup>+</sup> 327.1492; found = 327.1491.

**3-(2-bromophenyl)-1,5-diphenyl-1H-pyrazole (8e).** Purification by column chromatography (silica gel, hexane/ethyl acetate, 19:1). White solid, Yield: Path A: 243 mg, 65%; Path B: 251 mg, 67%. <sup>1</sup>H NMR (400 MHz, CDCl<sub>3</sub>): δ 7.99 (d, *J* = 8.0 Hz, 2H), 7.61 (d, *J* = 8.0 Hz, 1H), 7.47 (t, *J* = 8.0 Hz, 2H), 7.38–7.27 (m, 9H), 6.86 (s, 1H) ppm. <sup>13</sup>C{<sup>1</sup>H} NMR (100 MHz, CDCl<sub>3</sub>): δ 151.6, 142.6, 140.1, 133.2, 133.0, 132.5, 132.2, 130.4, 128.8, 128.7, 128.4, 128.0, 127.3, 127.1, 125.8, 124.1, 106.7 ppm. [C<sub>21</sub>H<sub>16</sub>BrN<sub>2</sub>]<sup>+</sup> 375.0491; found = 375.0489.

**3-(3-chlorophenyl)-1,5-diphenyl-1H-pyrazole (8f).** Purification by column chromatography (silica gel, hexane/ethyl acetate, 19:1). White solid, Yield: Path A: 234 mg, 71%; Path B: 238 mg, 72%. <sup>1</sup>H NMR (400 MHz, CDCl<sub>3</sub>): δ 7.95 (s, 1H), 7.80 (d, *J* = 8.0 Hz, 1H), 7.37–7.28 (m, 12H), 6.81 (s, 1H) ppm. <sup>13</sup>C NMR (100 MHz, CDCl<sub>3</sub>): δ 150.6, 144.6, 140.0, 134.9, 134.6, 130.3, 129.9, 128.9, 128.7, 128.5, 127.9, 127.6, 125.8, 125.3, 123.8, 113.4, 105.2 ppm. [M+H]<sup>+</sup> Calcd. for [C<sub>21</sub>H<sub>16</sub>ClN<sub>2</sub>]<sup>+</sup> 331.0997; found = 331.0993.

**3-(3-nitrophenyl)-1,5-diphenyl-1H-pyrazole (8g).** Purification by column chromatography (silica gel, hexane/ethyl acetate, 19:1). White solid, Yield: Path A: 208 mg, 61%; Path B: 215 mg, 63%. <sup>1</sup>H NMR (400 MHz, CDCl<sub>3</sub>): δ 8.75 (s, 1H), 8.27 (d, *J* = 8.0 Hz, 1H), 8.19 (d, *J* = 8.0 Hz, 1H), 7.59 (t, *J* = 8.0 Hz, 1H), 7.37–7.08 (m, 10H), 6.90 (s, 1H) ppm. <sup>13</sup>C NMR (100 MHz, CDCl<sub>3</sub>): δ 152.6, 148.6, 142.1, 139.8, 134.6, 132.8, 132.4, 129.8, 129.6, 129.0, 128.6, 128.5, 126.1, 125.7, 123.7, 123.3, 106.1 ppm. [M+H]<sup>+</sup> Calcd. for [C<sub>21</sub>H<sub>16</sub>N<sub>3</sub>O<sub>2</sub>]<sup>+</sup> 364.1056; found = 364.1054.

**1,5-diphenyl-3-(4-(trifluoromethyl)phenyl)-1H-pyrazole (8h).** Purification by column chromatography (silica gel, hexane/ethyl acetate, 19:1). White solid, Yield: Path A: 233 mg, 64%; Path B: 240 mg, 66%. <sup>1</sup>H NMR (400 MHz, CDCl<sub>3</sub>): δ 7.94 (d, *J* = 8.0 Hz, 2H), 7.61 (d, *J* = 8.0 Hz, 2H), 7.52–7.44 (m, 4H), 7.40–7.38 (m, 4H), 7.31–7.30 (m, 2H), 6.86 (s, 1H) ppm. <sup>13</sup>C NMR (100 MHz, CDCl<sub>3</sub>): δ 152.6, 144.7, 142.6, 132.3, 130.1, 129.2, 128.8–128.7 (q, *J* = 4.0 Hz), 128.4, 127.7, 126.1–126.0 (q, *J* = 4.0 Hz), 125.9, 125.2, 124.9, 124.3, 122.5, 106.3 ppm. <sup>19</sup>F{<sup>1</sup>H} NMR (376 MHz, CDCl<sub>3</sub>): δ –62.9 (s) ppm. [M+H]<sup>+</sup> Calcd. for [C<sub>21</sub>H<sub>16</sub>N<sub>2</sub>F<sub>3</sub>]<sup>+</sup> 365.3787; found = 365.3786.

**3-cyclopropyl-1,5-diphenyl-1H-pyrazole (8i).** Purification by column chromatography (silica gel, hexane/ethyl acetate, 19:1). White solid, Yield: Path A: 151 mg, 58%; Path B: 156 mg, 60%. <sup>1</sup>H NMR (400 MHz, CDCl<sub>3</sub>): δ 7.48 (d, *J* = 8.0 Hz, 2H), 7.36–7.22 (m, 6H), 7.02–6.90 (m, 2H), 6.69–6.65 (m, 1H), 3.67–3.64 (m, 2H), 2.53–2.50 (m, 1H), 2.14–2.08 (m, 2H) ppm. <sup>13</sup>C{<sup>1</sup>H} NMR (100 MHz, CDCl<sub>3</sub>): δ 147.3, 142.2, 137.4, 130.0, 128.9, 128.6, 127.5, 126.4, 125.9, 120.1, 113.9, 43.2, 20.3, 18.2 ppm. [M+H]<sup>+</sup> Calcd. for [C<sub>18</sub>H<sub>17</sub>N<sub>2</sub>]<sup>+</sup> 261.1386; found = 261.1384.

**2-(1,5-diphenyl-1H-pyrazol-3-yl)pyridine (8j).** Purification by column chromatography (silica gel, hexane/ethyl acetate, 19:1). White solid, Yield: Path A: 199 mg, 67%; Path B: 211 mg, 71%. <sup>1</sup>H NMR (400 MHz, CDCl<sub>3</sub>): δ 8.62 (d, *J* = 4.0 Hz, 1H), 7.94 (d, *J* = 8.0 Hz, 2H), 7.60 (t, *J* = 8.0 Hz, 1H), 7.45–7.30 (m, 8H), 7.23–7.16 (m, 2H), 7.13 (s, 1H) ppm. <sup>13</sup>C{<sup>1</sup>H} NMR (100 MHz, CDCl<sub>3</sub>): δ 152.1, 149.8, 143.6, 140.4, 136.2, 132.9, 128.9, 128.6, 128.0, 127.7, 125.8, 125.4, 123.5, 122.7, 120.3, 106.2 ppm. [M+H]<sup>+</sup> Calcd. for [C<sub>20</sub>H<sub>15</sub>N<sub>3</sub>Na]<sup>+</sup> 320.1158; found = 320.1156.

**3-(furan-2-yl)-1,5-diphenyl-1H-pyrazole (8k).** Purification by column chromatography (silica gel, hexane/ethyl acetate, 19:1). White solid, Yield: Path A: 197 mg, 69%; Path B: 203 mg, 71%. <sup>1</sup>H NMR (400 MHz, CDCl<sub>3</sub>): δ 7.49 (s, 1H), 7.35–7.26 (m, 10H), 6.80–6.76 (m, 2H), 6.50 (s, 1H) ppm. <sup>13</sup>C{<sup>1</sup>H} NMR (100 MHz, CDCl<sub>3</sub>): δ 148.5, 144.5, 144.1, 142.1, 139.9, 130.2, 128.9, 128.7, 128.5, 128.4, 127.6, 125.4, 111.3, 106.3, 104.8 ppm. [M+H]<sup>+</sup> Calcd. for [C<sub>19</sub>H<sub>15</sub>N<sub>2</sub>O]<sup>+</sup> 287.1179; found = 287.1177.

**1,5-diphenyl-3-(thiophen-2-yl)-1H-pyrazole (8l).** Purification by column chromatography (silica gel, hexane/ethyl acetate, 19:1). White solid, Yield: Path A: 223 mg, 74%; Path B: 226 mg, 75%. <sup>1</sup>H NMR (400 MHz, CDCl<sub>3</sub>): δ 7.92 (d, *J* = 8.0 Hz, 2H), 7.49–7.29 (m, 9H), 6.97 (t, *J* = 4.0 Hz, 1H), 6.89–6.86 (m, 2H) ppm. <sup>13</sup>C{<sup>1</sup>H} NMR (100 MHz, CDCl<sub>3</sub>): δ 151.9, 139.9, 138.2, 132.8, 131.3, 129.0, 128.6, 128.3, 128.0, 127.3, 127.2, 126.5, 126.2, 125.8, 105.0 ppm. [M+H]<sup>+</sup> Calcd. for [C<sub>19</sub>H<sub>15</sub>N<sub>2</sub>S]<sup>+</sup> 303.0950; found = 303.0948.

**3,5-diphenyl-1-(*o*-tolyl)-1H-pyrazole (9a).** Purification by column chromatography (silica gel, hexane/ethyl acetate, 19:1). White solid, Yield: Path A: 248 mg, 80%; Path B: 254 mg, 82%. <sup>1</sup>H NMR (400 MHz, CDCl<sub>3</sub>): δ 7.96 (d, *J* = 8.0 Hz, 2H), 7.48–7.44 (m, 2H), 7.39–7.33 (m, 3H), 7.29–7.24 (m, 7H), 6.91 (s, 1H), 2.07 (s, 3H) ppm. <sup>13</sup>C{<sup>1</sup>H} NMR (100 MHz, CDCl<sub>3</sub>): δ 151.6, 145.6, 139.3, 135.7, 132.8, 132.1, 131.1, 130.0, 129.1, 128.6, 128.4, 128.2,

128.1, 127.9, 126.7, 125.9, 103.2, 17.7 ppm.  $[M+H]^+$  Calcd. for  $[C_{22}H_{19}N_2]^+$  311.1543; found = 311.1542.

**3,5-diphenyl-1-(*m*-tolyl)-1H-pyrazole (9b).** Purification by column chromatography (silica gel, hexane/ethyl acetate, 19:1). White solid, Yield: Path A: 254 mg, 82%; Path B: 264 mg, 85%.  $^1H$  NMR (400 MHz,  $CDCl_3$ ):  $\delta$  7.94 (d,  $J = 8.0$  Hz, 2H), 7.46–7.43 (m, 2H), 7.37–7.31 (m, 7H), 7.22–7.18 (m, 1H), 7.14–7.12 (m, 1H), 7.06–7.04 (m, 1H), 6.83 (s, 1H), 2.36 (s, 1H) ppm.  $^{13}C\{^1H\}$  NMR (100 MHz,  $CDCl_3$ ):  $\delta$  151.8, 144.4, 140.0, 139.1, 133.0, 130.6, 128.7, 128.6, 128.5, 128.4, 128.3, 128.2, 128.0, 126.9, 125.8, 122.5, 105.0, 21.3 ppm.  $[M+H]^+$  Calcd. for  $[C_{22}H_{19}N_2]^+$  311.1543; found = 311.1537.

**3,5-diphenyl-1-(*p*-tolyl)-1H-pyrazole (9c).** Purification by column chromatography (silica gel, hexane/ethyl acetate, 19:1). White solid, Yield: Path A: 263 mg, 85%; Path B: 270 mg, 87%.  $^1H$  NMR (400 MHz,  $CDCl_3$ ):  $\delta$  7.94 (d,  $J = 8.0$  Hz, 2H), 7.46–7.42 (m, 3H), 7.36–7.25 (m, 7H), 7.16–7.14 (m, 2H), 6.82 (s, 1H), 2.37 (s, 3H) ppm.  $^{13}C\{^1H\}$  NMR (100 MHz,  $CDCl_3$ ):  $\delta$  151.6, 144.9, 144.4, 137.5, 132.9, 130.5, 129.5, 129.0, 128.6, 128.4, 128.0, 125.8, 125.2, 122.1, 104.9, 21.1 ppm.  $[M+H]^+$  Calcd. for  $[C_{22}H_{19}N_2]^+$  311.1543; found = 311.1538.

**1-(4-methoxyphenyl)-3,5-diphenyl-1H-pyrazole (9d).** Purification by column chromatography (silica gel, hexane/ethyl acetate, 19:1). White solid, Yield: Path A: 287 mg, 88%; Path B: 296 mg, 91%.  $^1H$  NMR (400 MHz,  $CDCl_3$ ):  $\delta$  7.93 (d,  $J = 8.0$  Hz, 2H), 7.45–7.42 (m, 2H), 7.36–7.29 (m, 8H), 6.88 (d,  $J = 8.0$  Hz, 2H), 6.82 (s, 1H), 3.82 (s, 3H) ppm.  $^{13}C\{^1H\}$  NMR (100 MHz,  $CDCl_3$ ):  $\delta$  158.9, 151.5, 144.4, 133.2, 132.9, 130.5, 128.7, 128.6, 128.4, 128.2, 128.0, 126.8, 125.8, 114.1, 104.6, 55.5 ppm.  $[M+H]^+$  Calcd. for  $[C_{22}H_{19}N_2O]^+$  327.1492; found = 327.1490.

**1-(3-chlorophenyl)-3,5-diphenyl-1H-pyrazole (9e).** Purification by column chromatography (silica gel, hexane/ethyl acetate, 19:1). White solid, Yield: Path A: 251 mg, 76%; Path B: 257 mg, 78%.  $^1H$  NMR (400 MHz,  $CDCl_3$ ):  $\delta$  7.95 (d,  $J = 8.0$  Hz, 2H), 7.76 (d,  $J = 8.0$  Hz, 1H), 7.56 (s, 1H), 7.50–7.46 (m, 2H), 7.41–7.38 (m, 4H), 7.36–7.30 (m, 4H), 7.19–7.18 (m, 1H), 6.86 (s, 1H) ppm.  $^{13}C\{^1H\}$  NMR (100 MHz,  $CDCl_3$ ):  $\delta$  152.2, 144.4, 138.6, 138.5, 132.9, 132.7, 130.5, 130.2, 129.0, 128.7, 128.6, 128.6, 128.5, 128.1, 126.2, 125.8, 105.5 ppm.  $[M+H]^+$  Calcd. for  $[C_{21}H_{16}ClN_2]^+$  331.0997; found = 331.0995.

**1-(3-bromophenyl)-3,5-diphenyl-1H-pyrazole (9f).** Purification by column chromatography (silica gel, hexane/ethyl acetate, 19:1). White solid, Yield: Path A: 303 mg, 81%; Path B: 307 mg, 82%.  $^1H$  NMR (400 MHz,  $CDCl_3$ ):  $\delta$  7.96 (d,  $J = 8.0$  Hz, 2H), 7.70 (s, 1H), 7.49–7.46

(m, 4H), 7.41–7.39 (m, 5H), 7.25–7.18 (m, 2H), 6.86 (s, 1H) ppm.  $^{13}\text{C}\{^1\text{H}\}$  NMR (100 MHz,  $\text{CDCl}_3$ ):  $\delta$  152.5, 144.7, 139.3, 130.5, 130.0, 129.9, 128.8, 128.7, 128.6, 128.5, 128.3, 128.2, 125.9, 123.8, 105.7 ppm.  $[\text{M}+\text{H}]^+$  Calcd. For  $[\text{C}_{21}\text{H}_{16}\text{BrN}_2]^+$  375.0491; found = 375.0485.

**1-(4-fluorophenyl)-3,5-diphenyl-1H-pyrazole (9g).** Purification by column chromatography (silica gel, hexane/ethyl acetate, 19:1). White solid, Yield: Path A: 220 mg, 70%; Path B: 229 mg, 73%.  $^1\text{H}$  NMR (400 MHz,  $\text{CDCl}_3$ ):  $\delta$  7.92 (d,  $J$  = 8.0 Hz, 2H), 7.46–7.42 (m, 2H), 7.36–7.34 (m, 6H), 7.29–7.27 (m, 2H), 7.05 (t,  $J$  = 8.0 Hz, 2H), 6.83 (s, 1H) ppm.  $^{13}\text{C}\{^1\text{H}\}$  NMR (100 MHz,  $\text{CDCl}_3$ ):  $\delta$  162.9, 160.5, 151.9, 144.6, 136.0, 132.6, 130.19, 128.7 (d,  $J$  = 4.0 Hz), 128.6, 128.5, 128.2, 127.1 (d,  $J$  = 4.0 Hz), 125.9, 115.5 ( $J$  = 12.0 Hz), 105.1 ppm.  $^{19}\text{F}\{^1\text{H}\}$  NMR (376 MHz,  $\text{CDCl}_3$ ):  $\delta$  -114.7 (s) ppm.  $[\text{M}+\text{H}]^+$  Calcd. for  $[\text{C}_{21}\text{H}_{16}\text{FN}_2]^+$  315.1292; found = 315.1287.

**1-(4-chlorophenyl)-3,5-diphenyl-1H-pyrazole (9h).** Purification by column chromatography (silica gel, hexane/ethyl acetate, 19:1). White solid, Yield: Path A: 245 mg, 74%; Path B: 255 mg, 77%.  $^1\text{H}$  NMR (400 MHz,  $\text{CDCl}_3$ ):  $\delta$  7.94 (d,  $J$  = 8.0 Hz, 2H), 7.48–7.44 (m, 2H), 7.39–7.29 (m, 10H), 6.84 (s, 1H) ppm.  $^{13}\text{C}\{^1\text{H}\}$  NMR (100 MHz,  $\text{CDCl}_3$ ):  $\delta$  152.2, 144.4, 138.7, 133.0, 132.8, 130.5, 130.3, 129.0, 128.8, 128.7, 128.6, 128.2, 126.3, 125.8, 105.6 ppm.  $[\text{M}+\text{H}]^+$  Calcd. for  $[\text{C}_{21}\text{H}_{16}\text{ClN}_2]^+$  331.0997; found = 331.0994.

**1-(4-bromophenyl)-3,5-diphenyl-1H-pyrazole (9i).** Purification by column chromatography (silica gel, hexane/ethyl acetate, 19:1). White solid, Yield: Path A: 295 mg, 79%; Path B: 303 mg, 81%.  $^1\text{H}$  NMR (400 MHz,  $\text{CDCl}_3$ ):  $\delta$  7.94 (d,  $J$  = 8.0 Hz, 2H), 7.50–7.44 (m, 4H), 7.39–7.34 (m, 5H), 7.31–7.29 (m, 3H), 6.84 (s, 1H) ppm.  $^{13}\text{C}\{^1\text{H}\}$  NMR (100 MHz,  $\text{CDCl}_3$ ):  $\delta$  152.2, 144.5, 139.0, 132.7, 132.0, 130.2, 128.8, 128.7, 128.7, 128.6, 128.2, 126.6, 125.8, 121.0, 105.7 ppm.  $[\text{M}+\text{H}]^+$  Calcd. for  $[\text{C}_{21}\text{H}_{16}\text{BrN}_2]^+$  375.0491; found = 375.0487.

**3,5-diphenyl-1-(4-(trifluoromethyl)phenyl)-1H-pyrazole (9j).** Purification by column chromatography (silica gel, hexane/ethyl acetate, 19:1). White solid, Yield: Path A: 237 mg, 65%; Path B: 251 mg, 69%.  $^1\text{H}$  NMR (400 MHz,  $\text{CDCl}_3$ ):  $\delta$  7.93 (d,  $J$  = 8.0 Hz, 2H), 7.62–7.59 (m, 2H), 7.52–7.50 (m, 2H), 7.47–7.43 (m, 2H), 7.39–7.35 (m, 4H), 7.31–7.29 (m, 2H), 6.85 (s, 1H) ppm.  $^{13}\text{C}\{^1\text{H}\}$  NMR (100 MHz,  $\text{CDCl}_3$ ):  $\delta$  152.6, 144.7, 142.6, 132.3, 130.1, 129.2, 128.8–128.7 (q,  $J$  = 4.0 Hz), 128.4, 127.7, 126.1–126.0 (q,  $J$  = 4.0 Hz), 125.9, 125.2, 124.9, 124.3, 122.5, 106.2 ppm.  $^{19}\text{F}\{^1\text{H}\}$  NMR (376 MHz,  $\text{CDCl}_3$ ):  $\delta$  -62.3 (s) ppm.  $[\text{M}+\text{H}]^+$  Calcd. for  $[\text{C}_{21}\text{H}_{16}\text{N}_2\text{F}_3]^+$  365.1260; found = 365.3785.

**(E)-chalcone (10).**<sup>28a,d</sup> Purification by column chromatography (silica gel, hexane/diethyl ether (30:1)). Light yellow solid. <sup>1</sup>H NMR (CDCl<sub>3</sub>, 400 MHz): δ 7.80 (s, 2H), 7.72 (d, *J* = 8.0 Hz, 4H), 7.49 (t, *J* = 8.0 Hz, 4H), 7.42–7.38 (m, 2H) ppm.

**1-((E)-1,3-diphenylallylidene)-2-phenylhydrazine (11).** Purification by column chromatography (silica gel, hexane/diethyl ether (30:1)). Brown solid. <sup>1</sup>H NMR (CDCl<sub>3</sub>, 400 MHz): δ 7.96 (d, *J* = 8.0 Hz, 2H), 7.51–7.33 (m, 14H), 7.21 (s, 1H) ppm. <sup>13</sup>C{<sup>1</sup>H} NMR (100 MHz, CDCl<sub>3</sub>): δ 151.4, 144.6, 140.2, 133.1, 130.4, 129.5, 129.2, 129.1, 128.9, 128.9, 128.5, 128.2, 125.8, 125.7, 105.8 ppm. [M+H]<sup>+</sup> Calcd. for [C<sub>21</sub>H<sub>18</sub>N<sub>2</sub>Na]<sup>+</sup> 321.1362; found = 321.1360.

**(E)-1-benzylidene-2-phenylhydrazine (12).**<sup>2</sup> Purification by column chromatography (silica gel, hexane/diethyl ether (30:1)). Yellow solid. <sup>1</sup>H NMR (CDCl<sub>3</sub>, 400 MHz): δ 7.68–7.66 (m, 3H), 7.38 (t, *J* = 8.0 Hz, 2H), 7.32–7.27 (m, 3H), 7.13 (d, *J* = 8.0 Hz, 2H), 6.88 (t, *J* = 8.0 Hz, 1H) ppm. <sup>13</sup>C{<sup>1</sup>H} NMR (100 MHz, CDCl<sub>3</sub>): δ 144.6, 137.2, 135.3, 129.3, 128.6, 128.4, 126.2, 120.1, 112.7 ppm.

## NMR Spectra of the Isolated Compounds

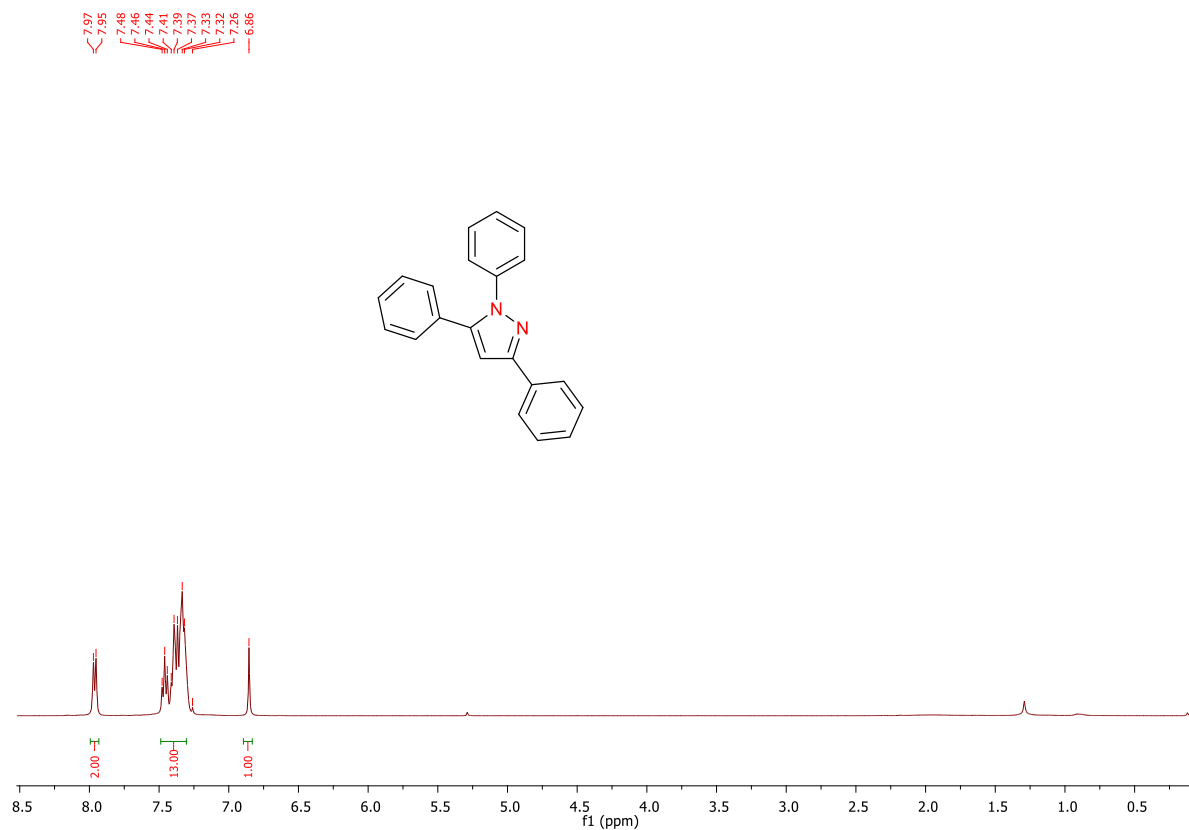

**Figure S3.** <sup>1</sup>H NMR spectrum of **7a** (400 MHz in CDCl<sub>3</sub>).

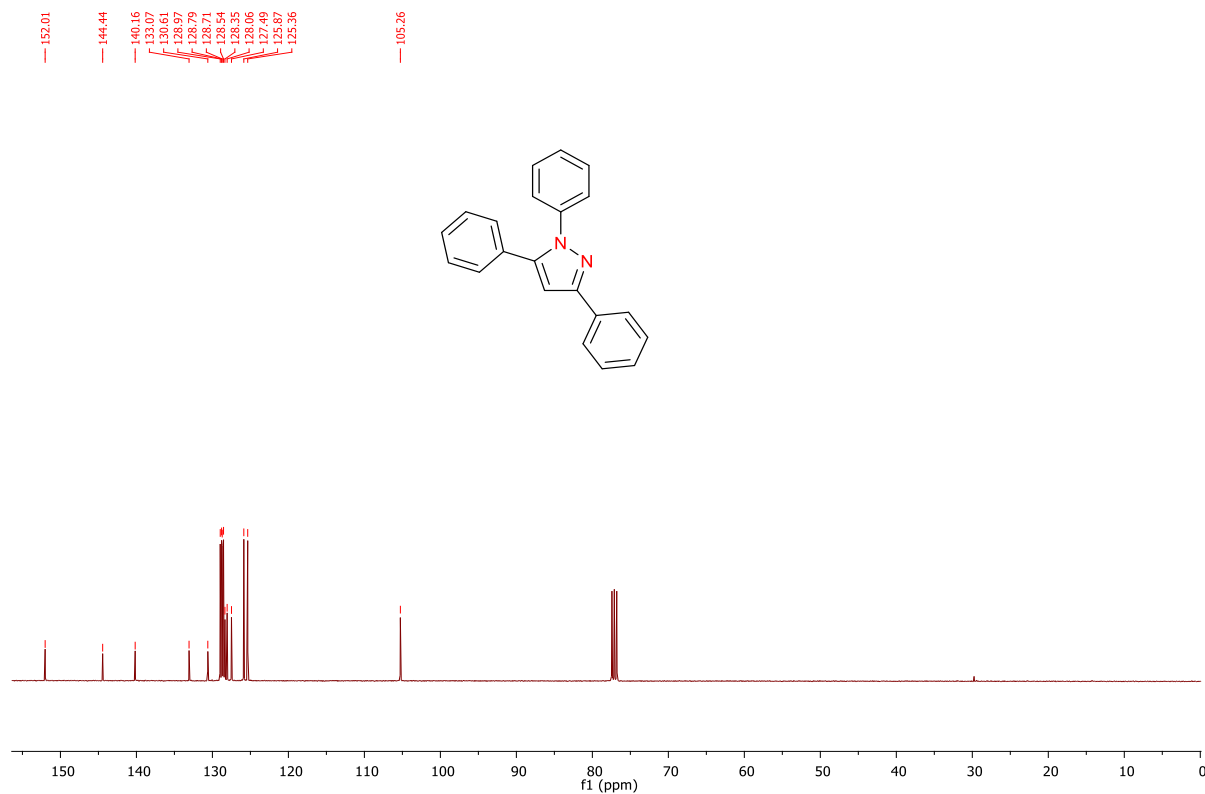

**Figure S4.** <sup>13</sup>C NMR spectrum of **7a** (100 MHz in CDCl<sub>3</sub>).

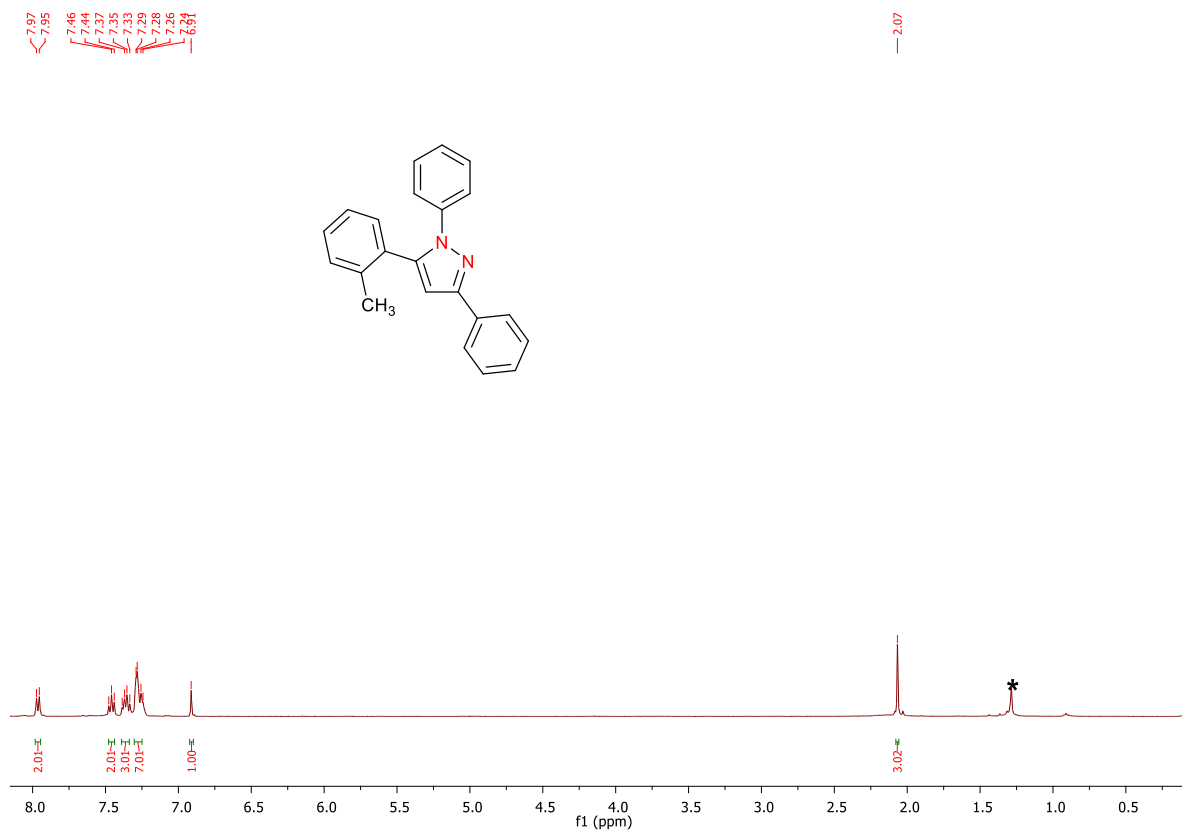

**Figure S5.** <sup>1</sup>H NMR spectrum of **7b** (400 MHz in CDCl<sub>3</sub>). (\*hexane)

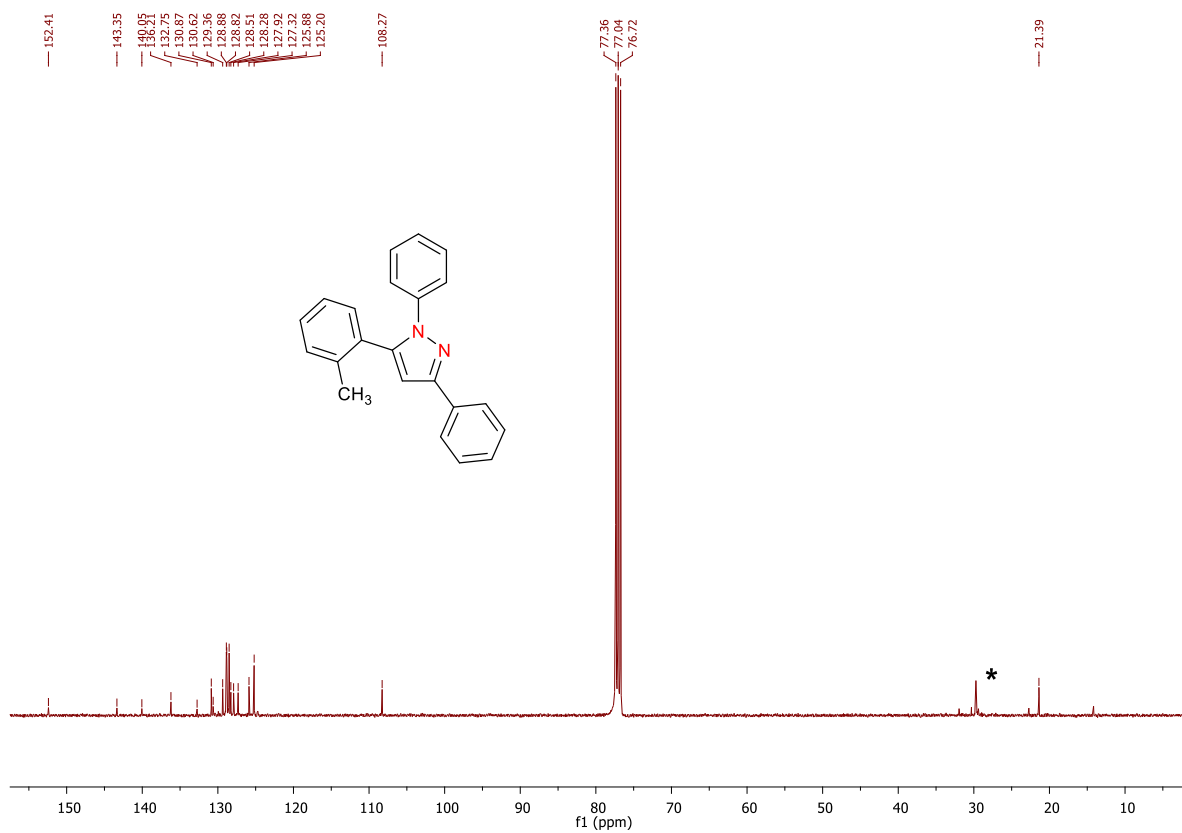

**Figure S6.** <sup>13</sup>C NMR spectrum of **7b** (100 MHz in CDCl<sub>3</sub>). (\*hexane)

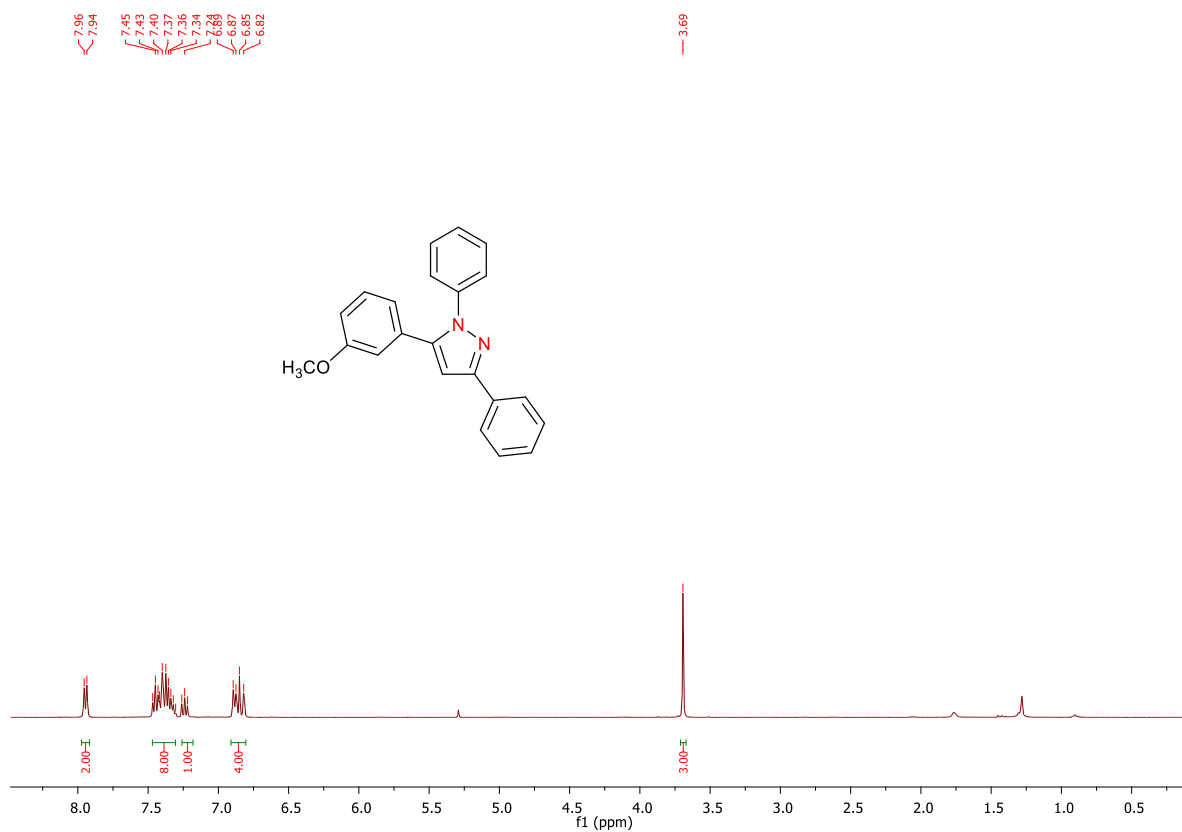

**Figure S7.** <sup>1</sup>H NMR spectrum of **7c** (400 MHz in CDCl<sub>3</sub>).

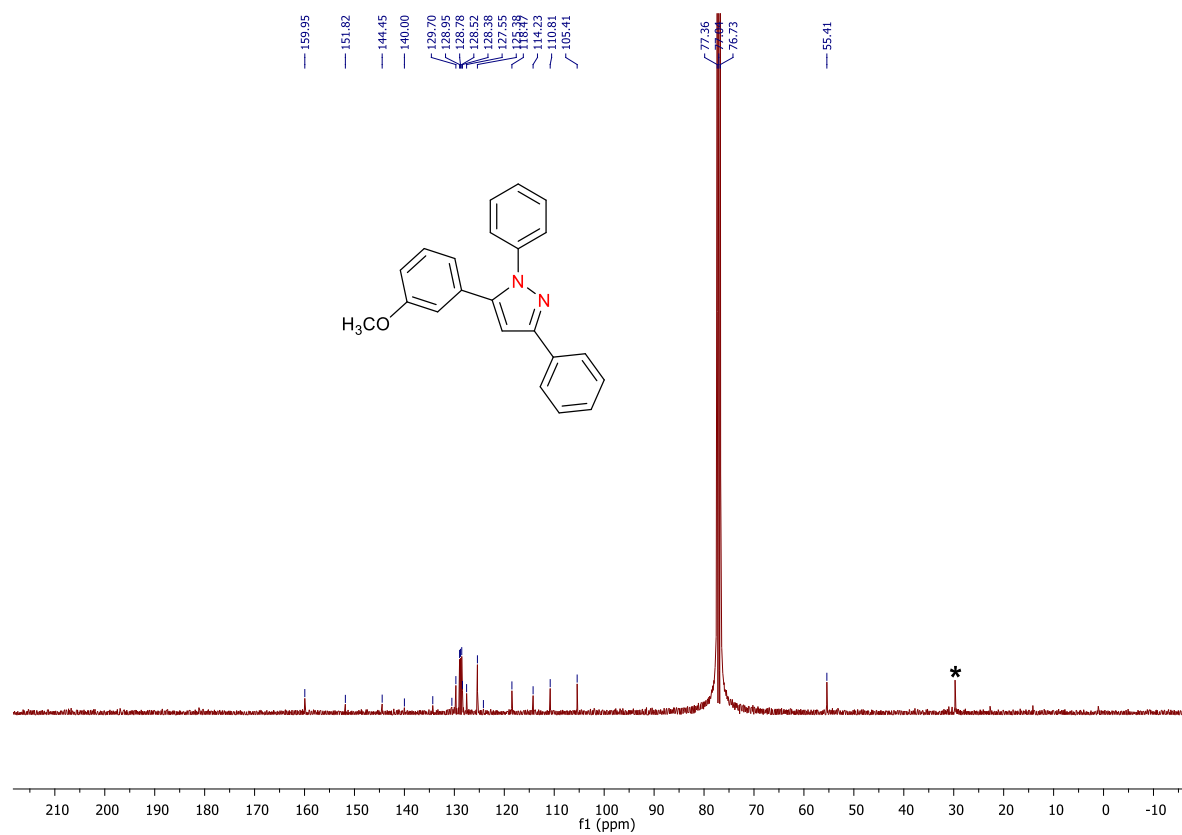

**Figure S8.** <sup>13</sup>C NMR spectrum of **7c** (100 MHz in CDCl<sub>3</sub>). (\*hexane)



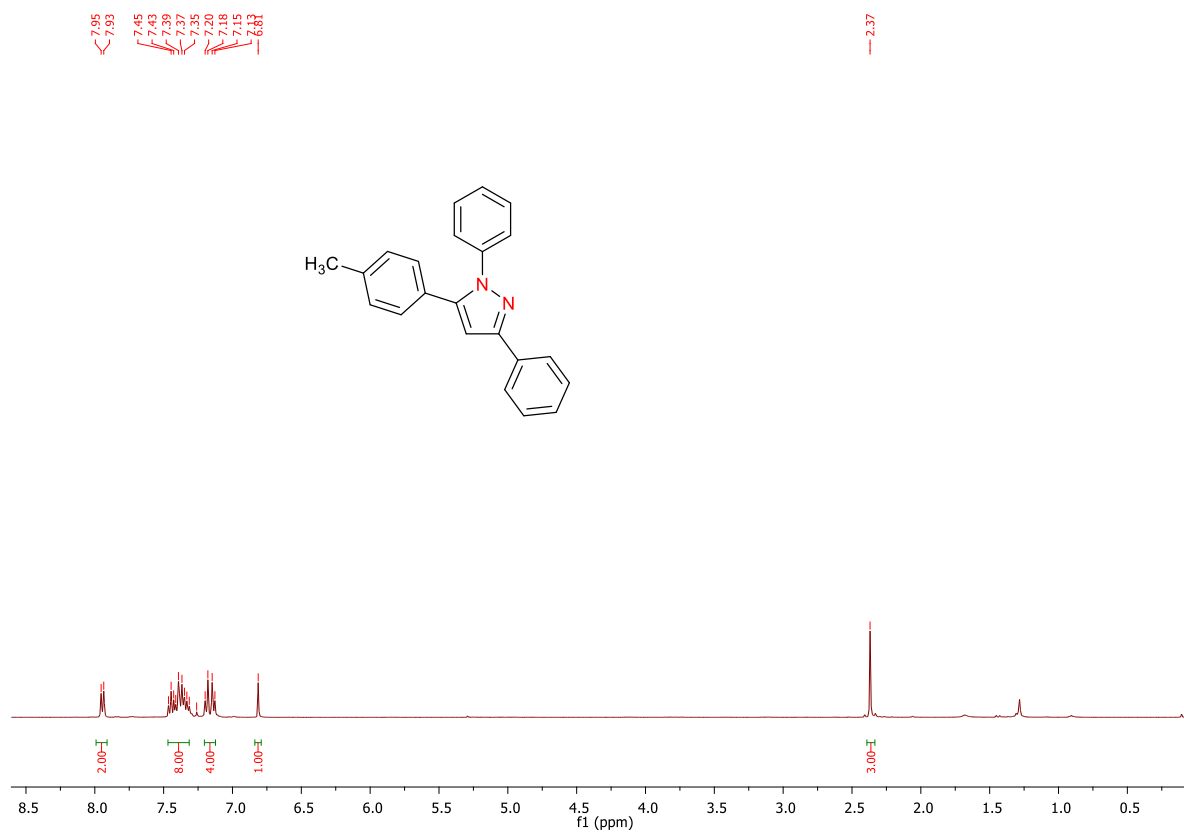

**Figure S9.** <sup>1</sup>H NMR spectrum of **7d** (400 MHz in CDCl<sub>3</sub>).

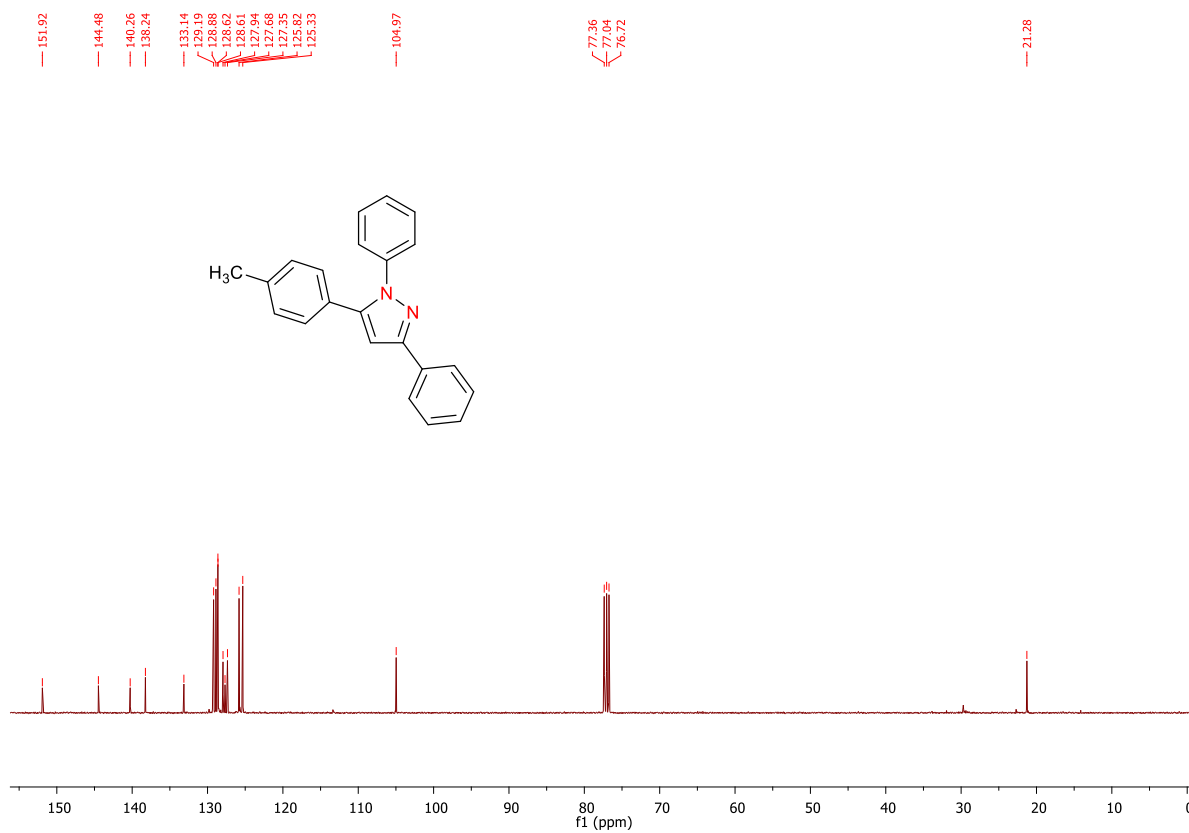

**Figure S10.** <sup>13</sup>C NMR spectrum of **7d** (100 MHz in CDCl<sub>3</sub>).

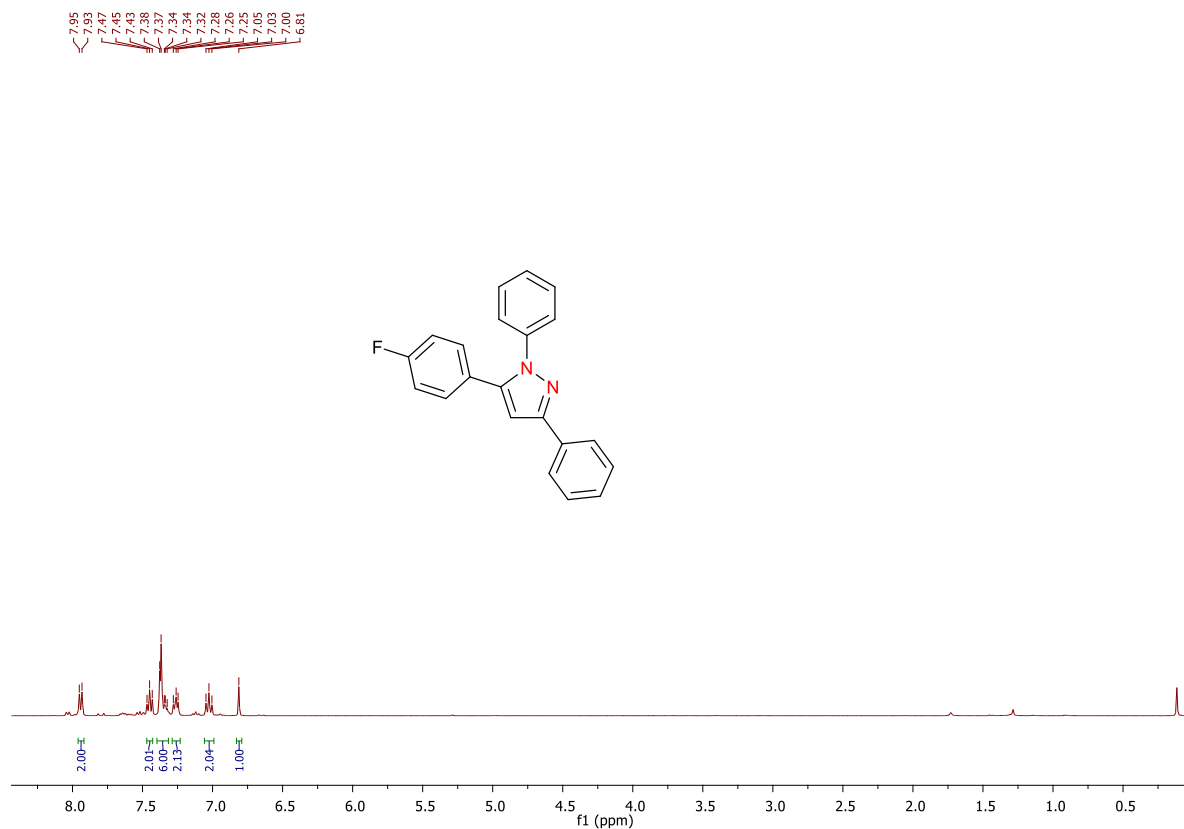

**Figure S11.** <sup>1</sup>H NMR spectrum of **7e** (400 MHz in CDCl<sub>3</sub>).

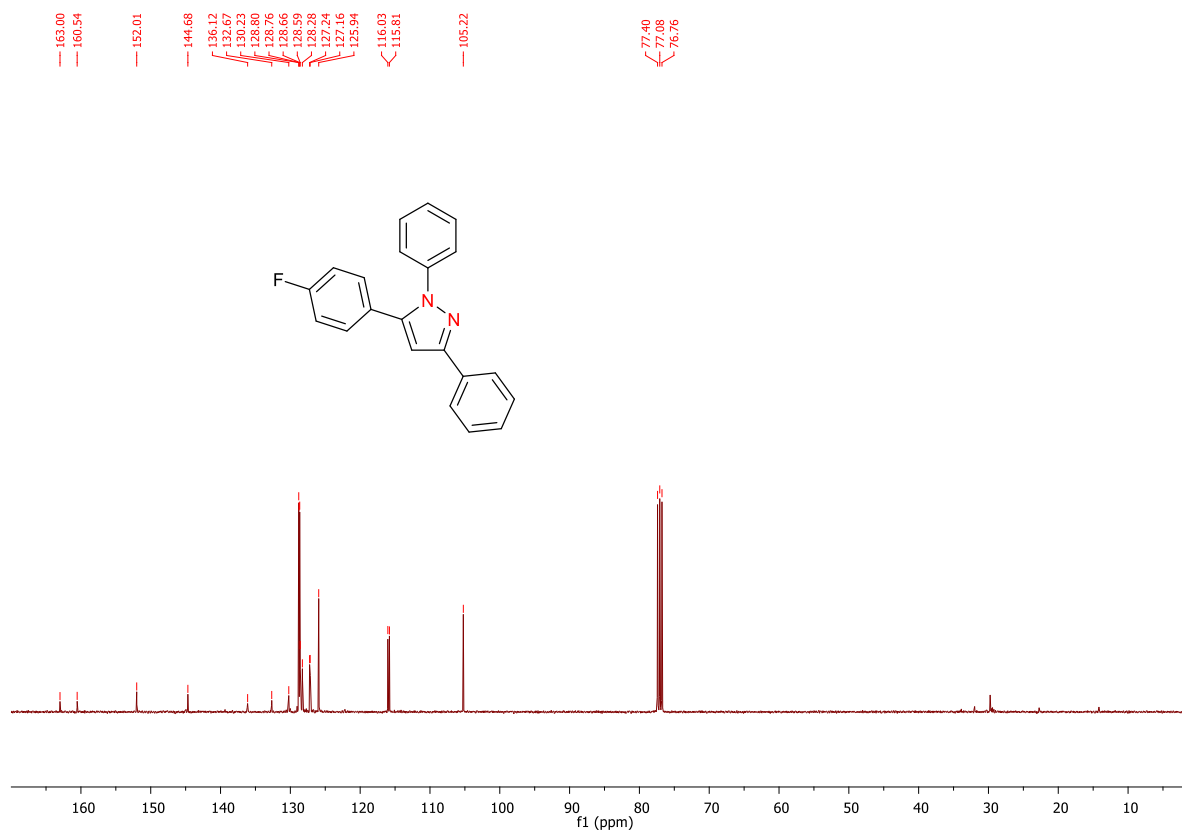

**Figure S12.** <sup>13</sup>C NMR spectrum of **7e** (100 MHz in CDCl<sub>3</sub>).

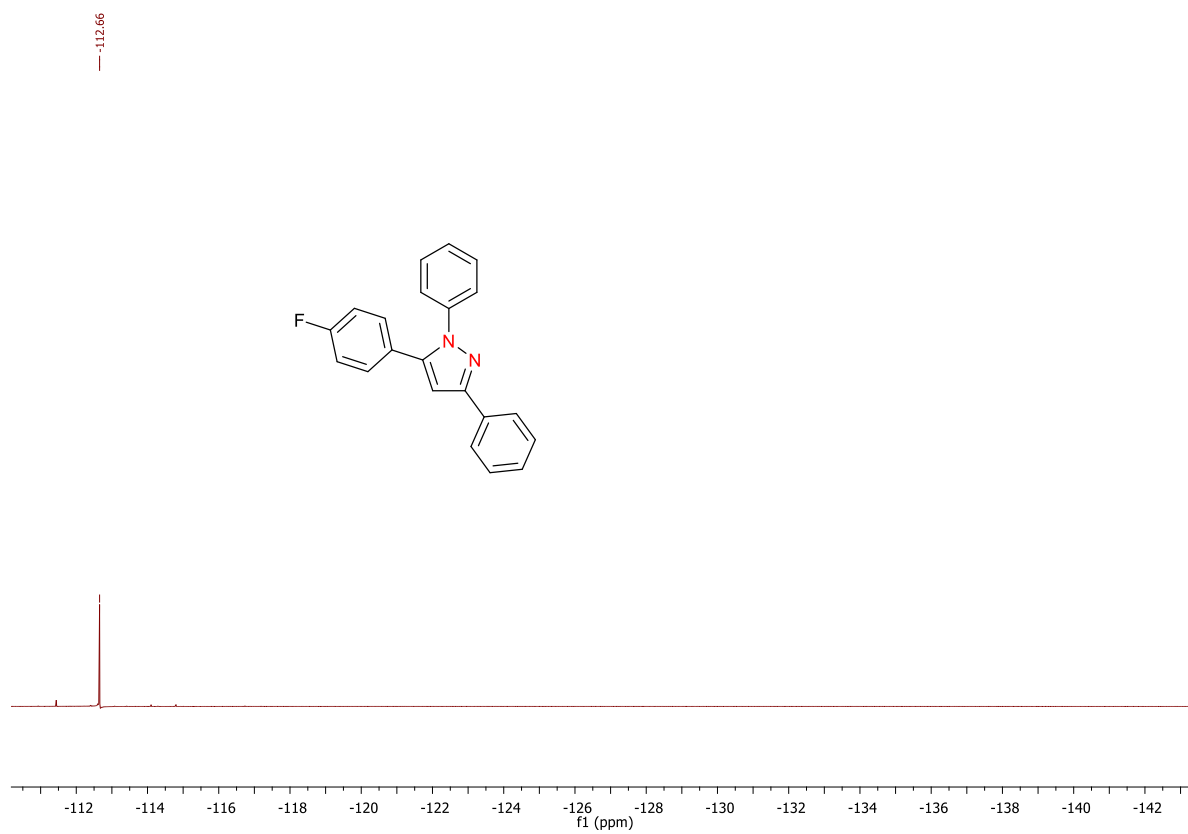

**Figure S13.**  $^{19}\text{F}$  NMR spectrum of **7e** (376 MHz in  $\text{CDCl}_3$ ).

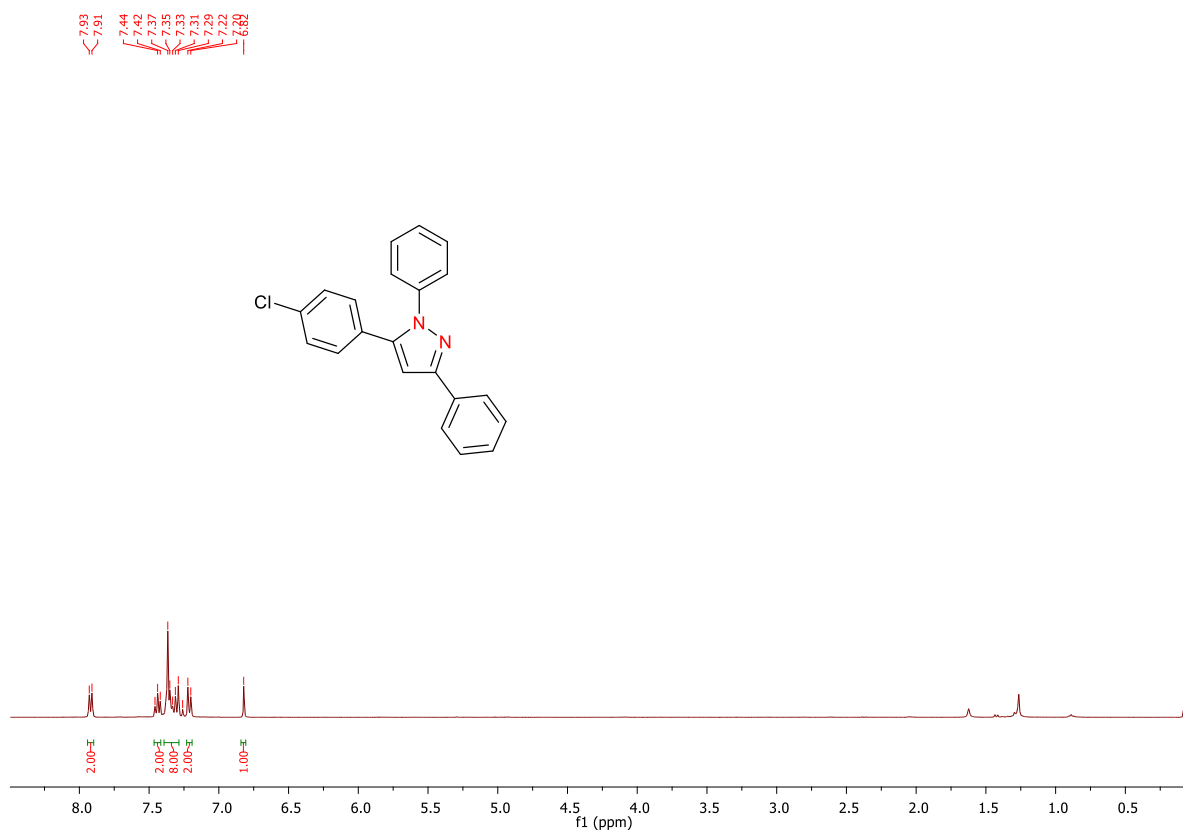

**Figure S14.** <sup>1</sup>H NMR spectrum of **7f** (400 MHz in CDCl<sub>3</sub>).

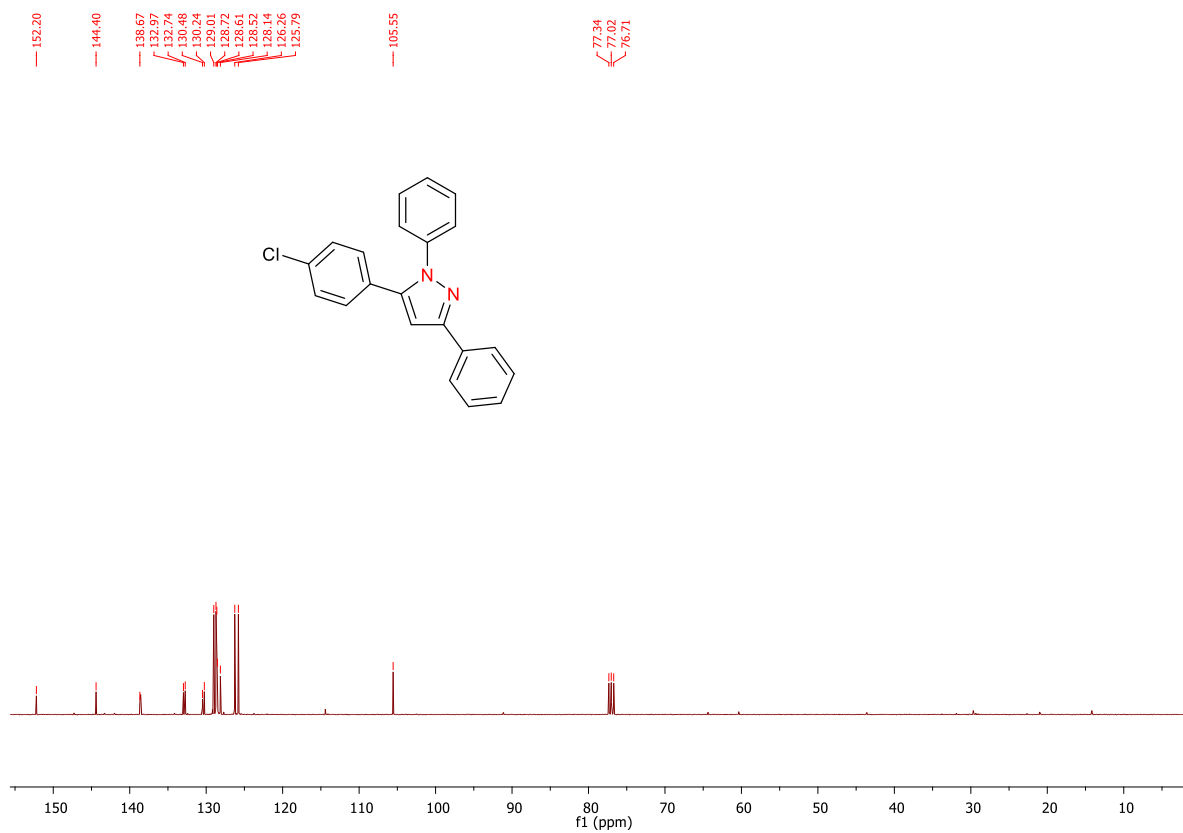

**Figure S15.** <sup>13</sup>C NMR spectrum of **7f** (100 MHz in CDCl<sub>3</sub>).

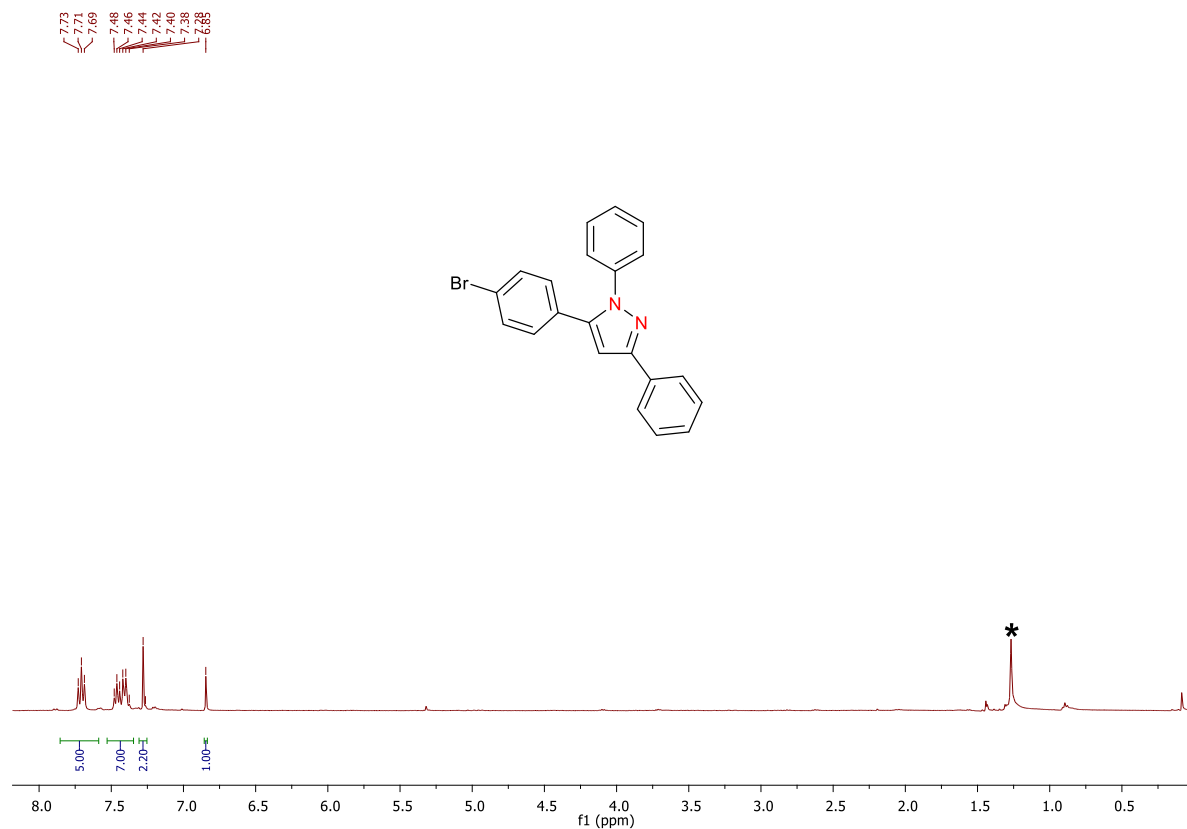

**Figure S16.** <sup>1</sup>H NMR spectrum of **7g** (400 MHz in CDCl<sub>3</sub>). (\*hexane)

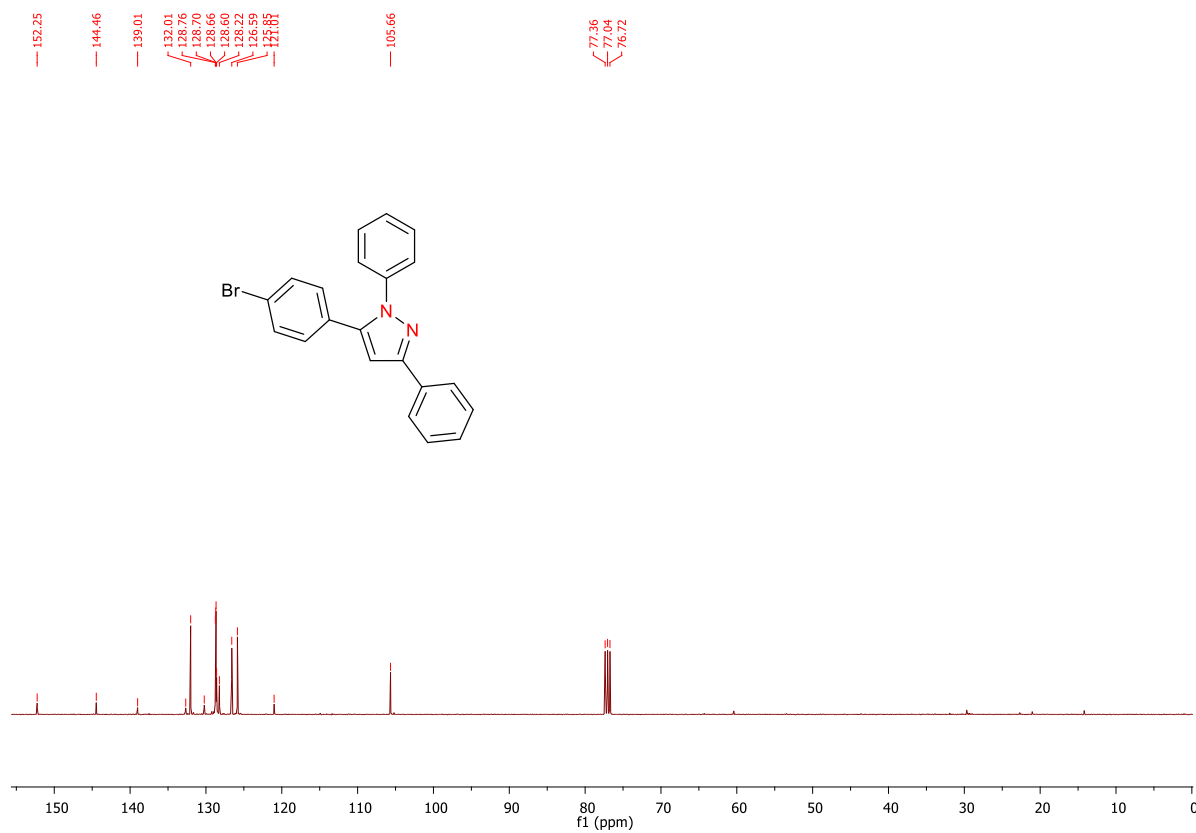

**Figure S17.** <sup>13</sup>C NMR spectrum of **7g** (100 MHz in CDCl<sub>3</sub>).

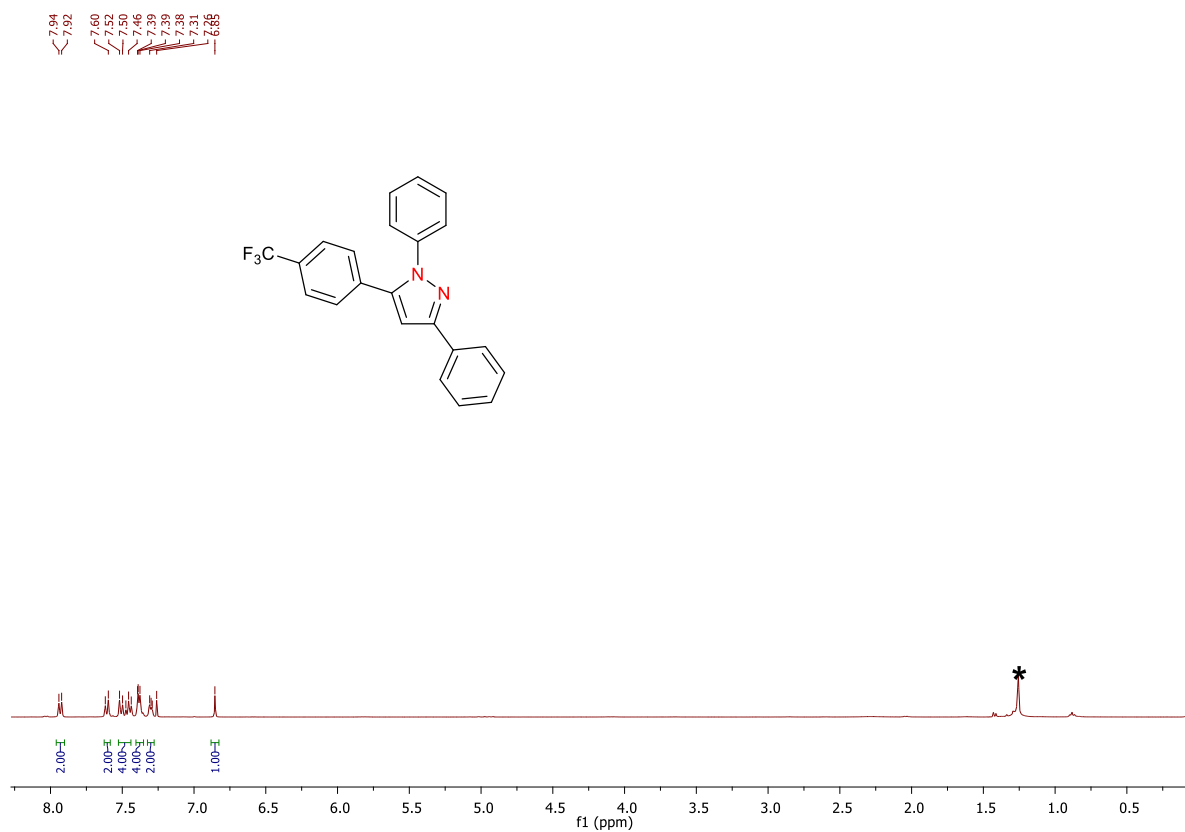

**Figure S18.** <sup>1</sup>H NMR spectrum of **7h** (400 MHz in CDCl<sub>3</sub>). (\*hexane)

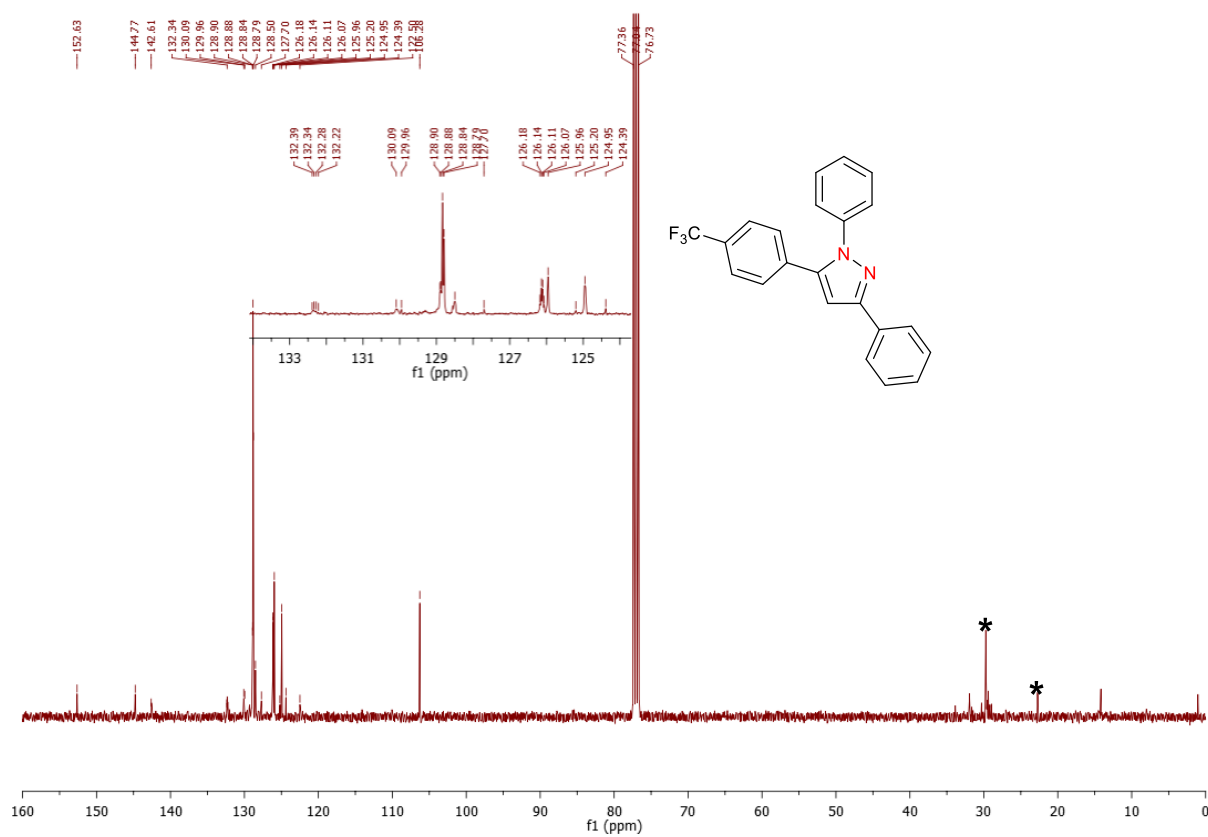

**Figure S19.** <sup>13</sup>C NMR spectrum of **7h** (100 MHz in CDCl<sub>3</sub>). (\*hexane)

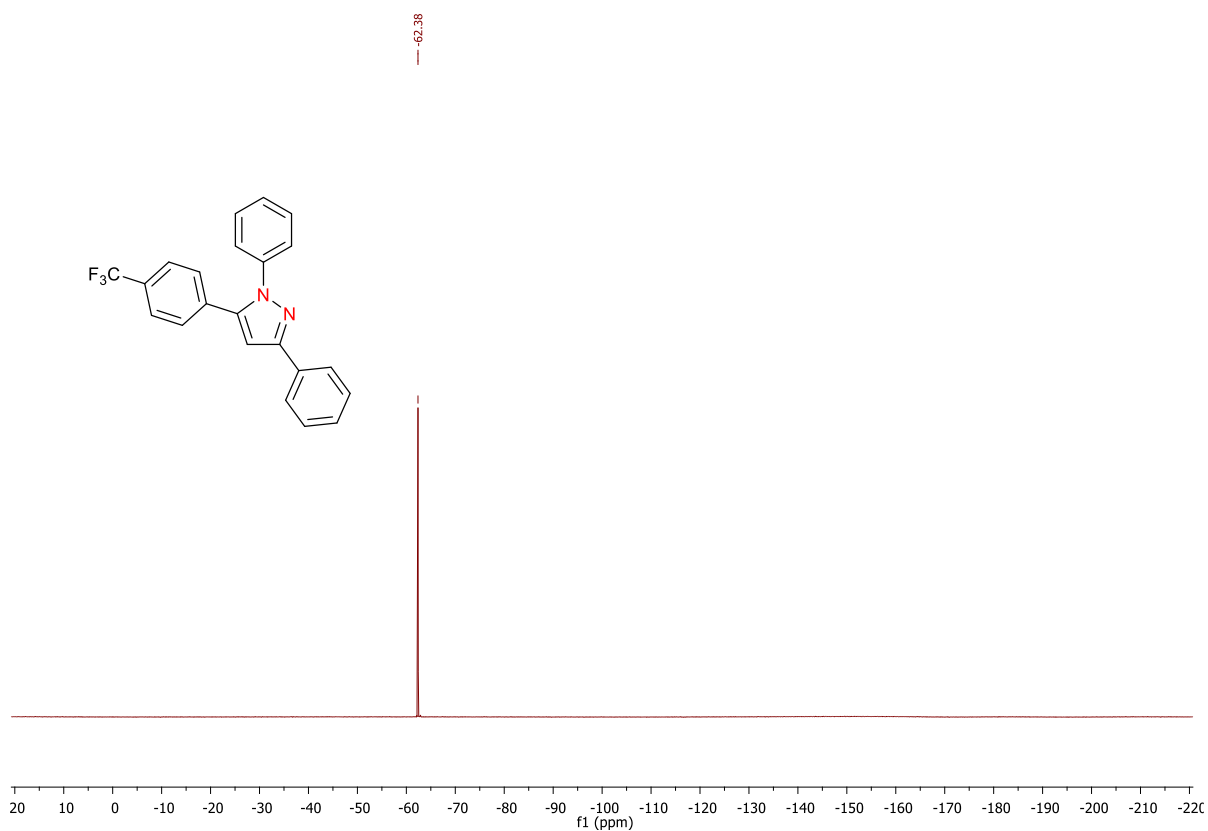

**Figure S20.**  $^{19}\text{F}$  NMR spectrum of **7h** (376 MHz in  $\text{CDCl}_3$ ).

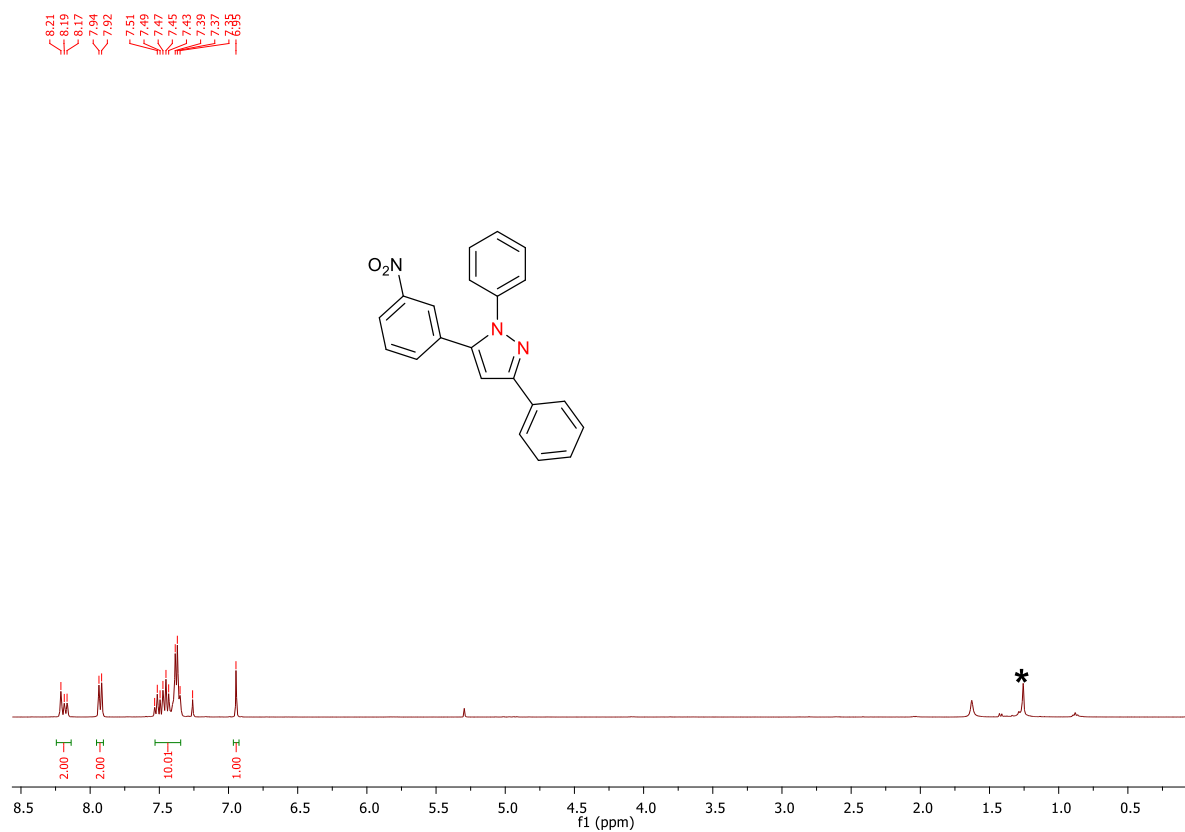

**Figure S21.**  $^1\text{H}$  NMR spectrum of **7i** (400 MHz in  $\text{CDCl}_3$ ). (\*hexane)

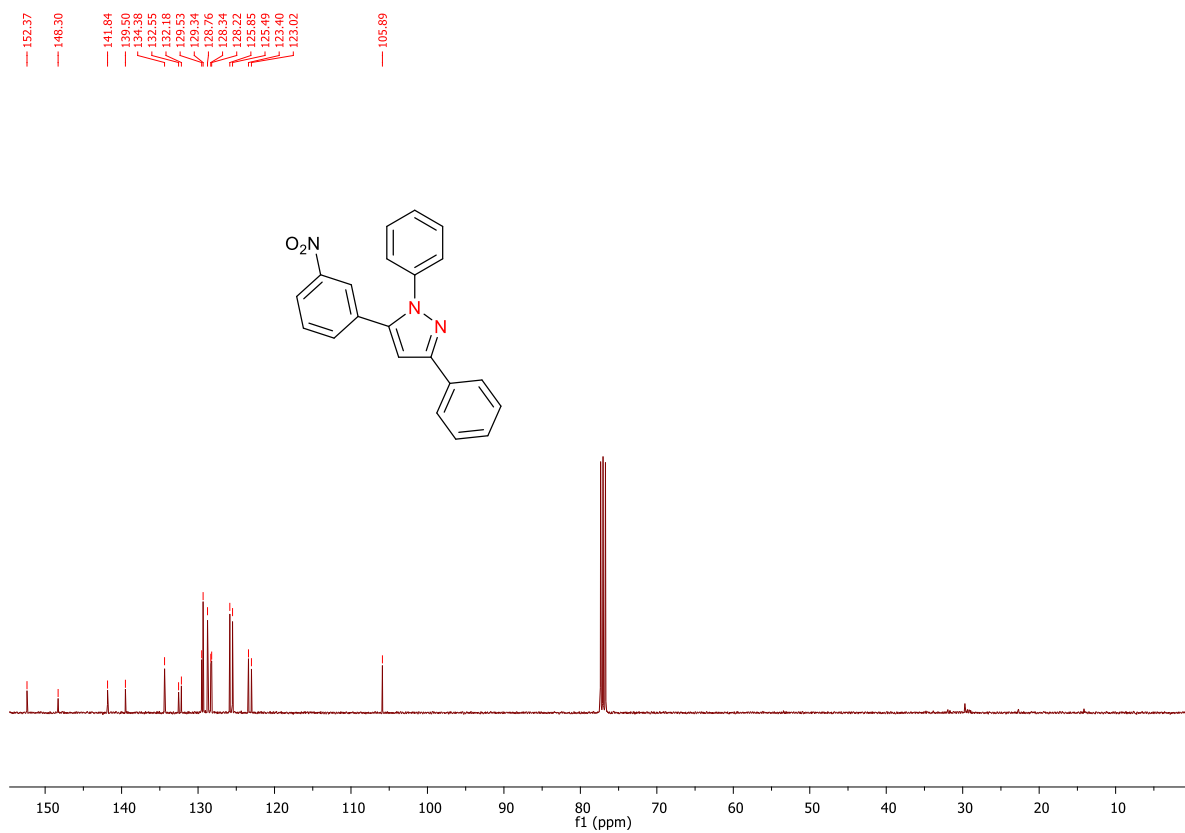

**Figure S22.**  $^{13}\text{C}$  NMR spectrum of **7i** (100 MHz in  $\text{CDCl}_3$ ).



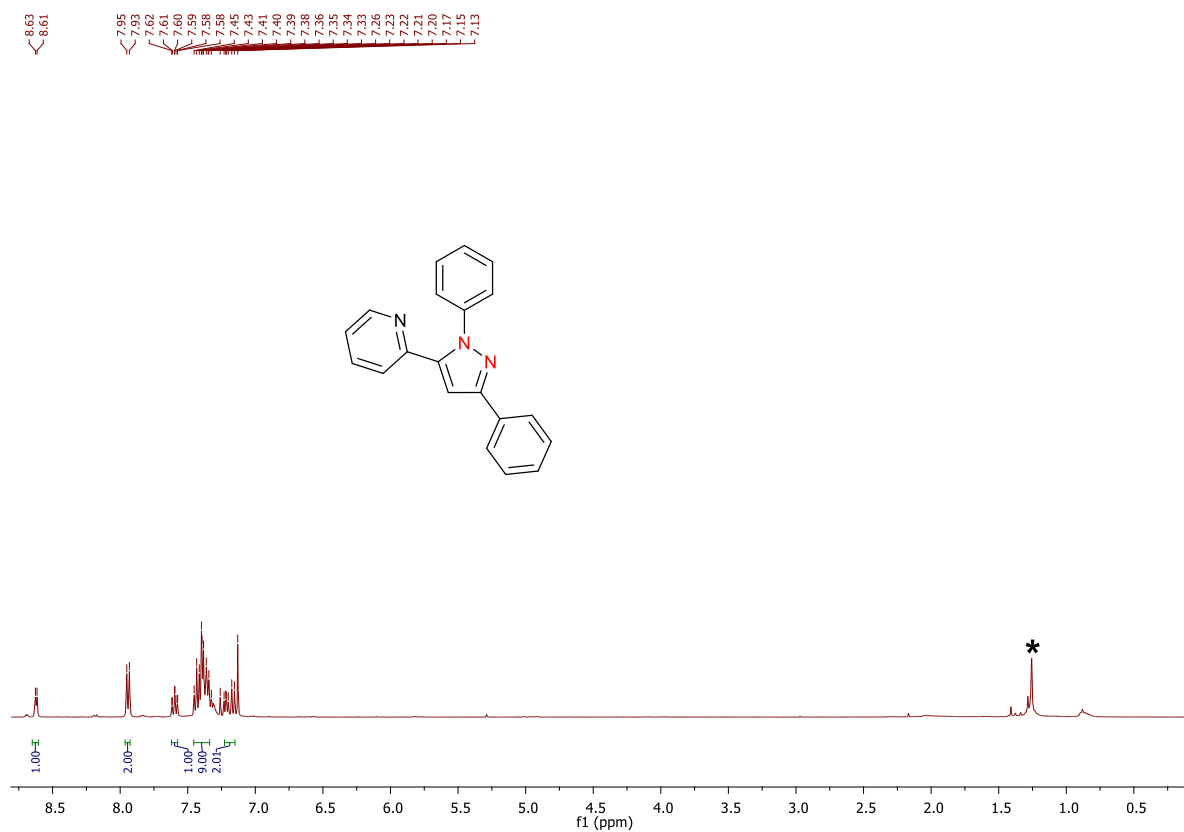

**Figure S23.** <sup>1</sup>H NMR spectrum of **7j** (400 MHz in CDCl<sub>3</sub>). (\*hexane)

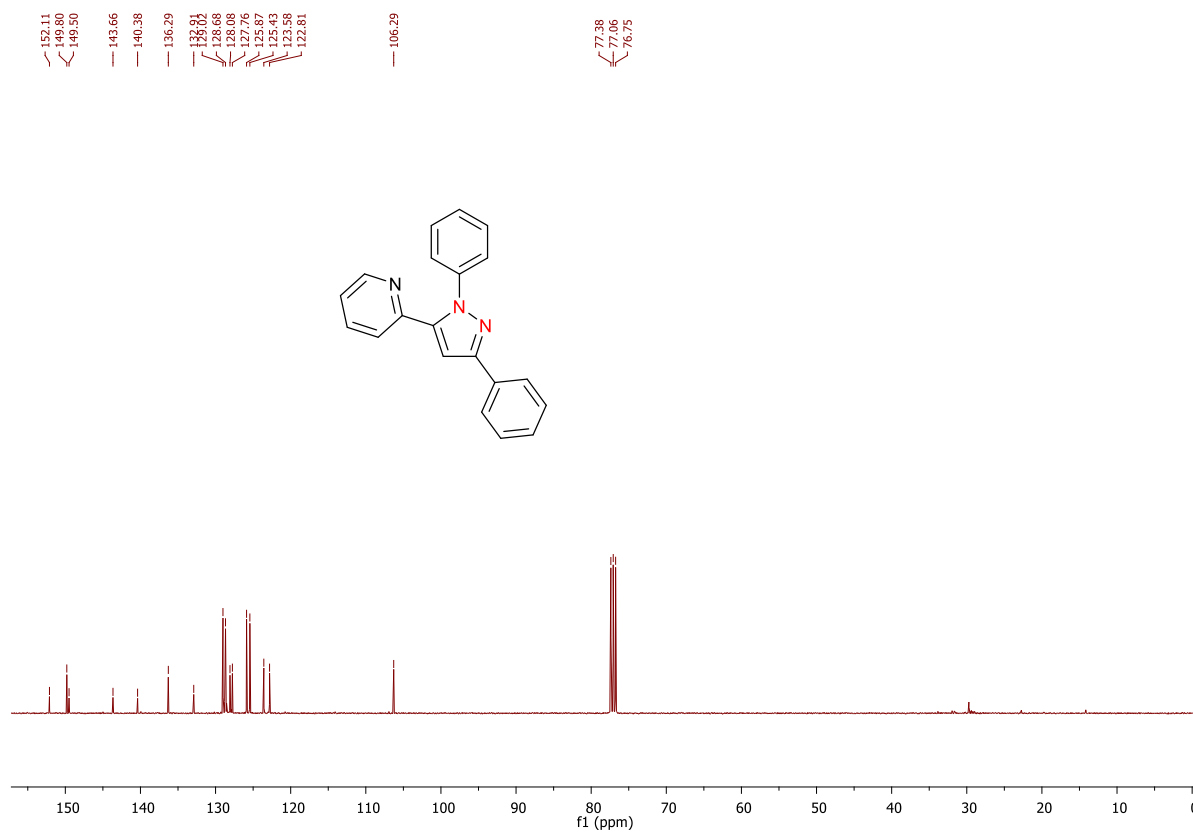

**Figure S24.** <sup>13</sup>C NMR spectrum of **7j** (100 MHz in CDCl<sub>3</sub>).

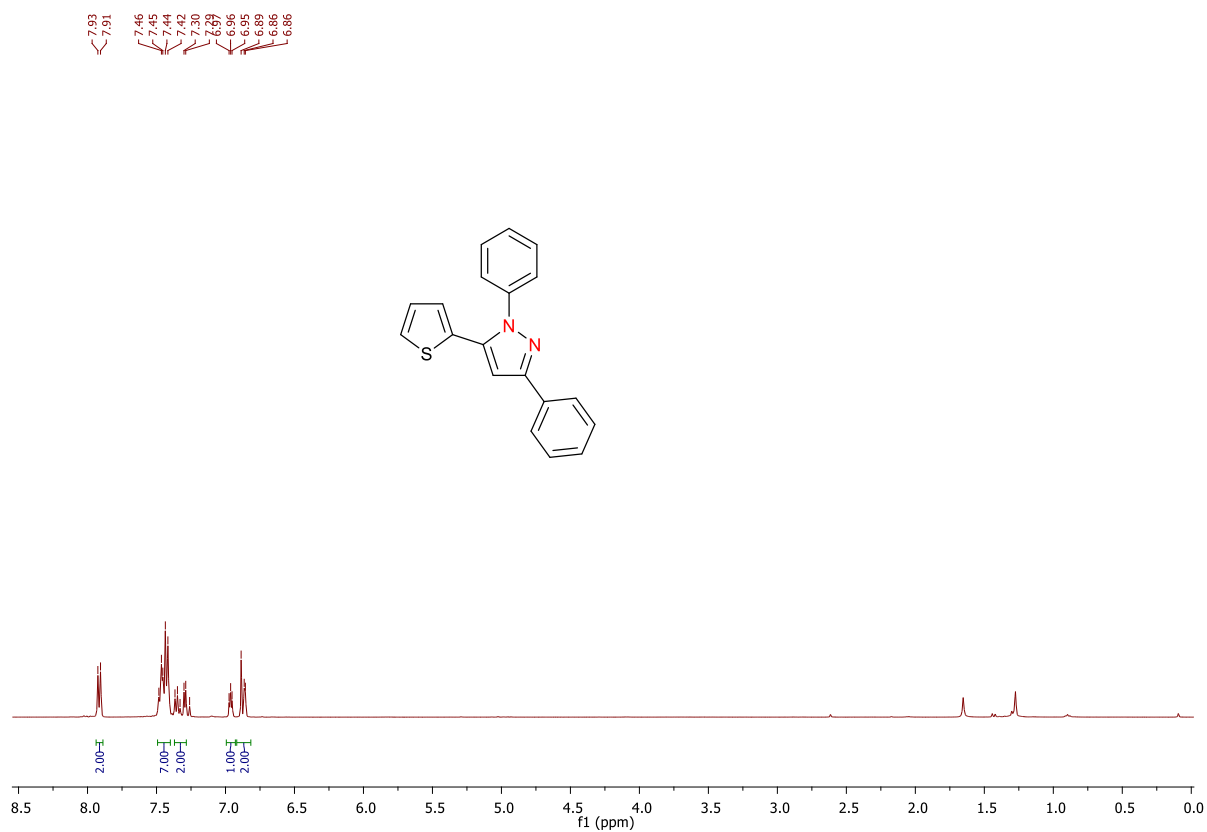

**Figure S25.** <sup>1</sup>H NMR spectrum of **7k** (400 MHz in CDCl<sub>3</sub>).

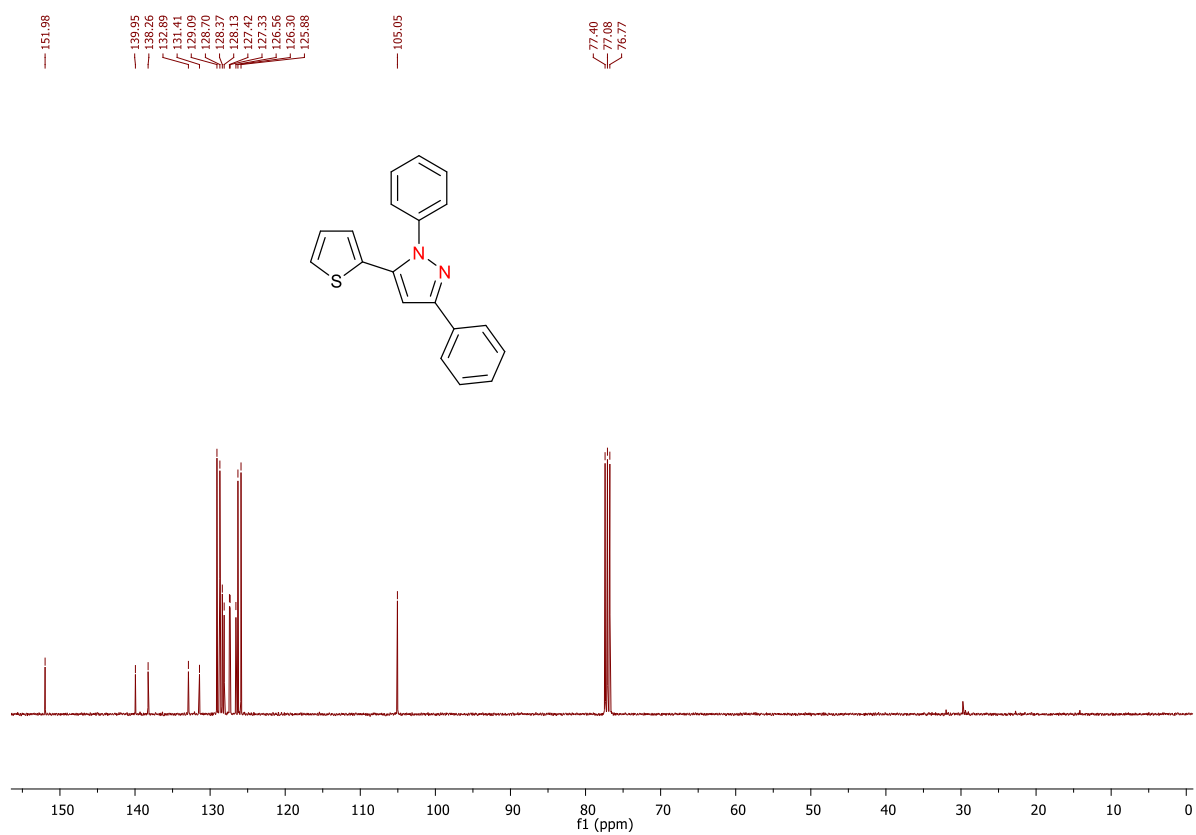

**Figure S26.** <sup>13</sup>C NMR spectrum of **7k** (100 MHz in CDCl<sub>3</sub>).

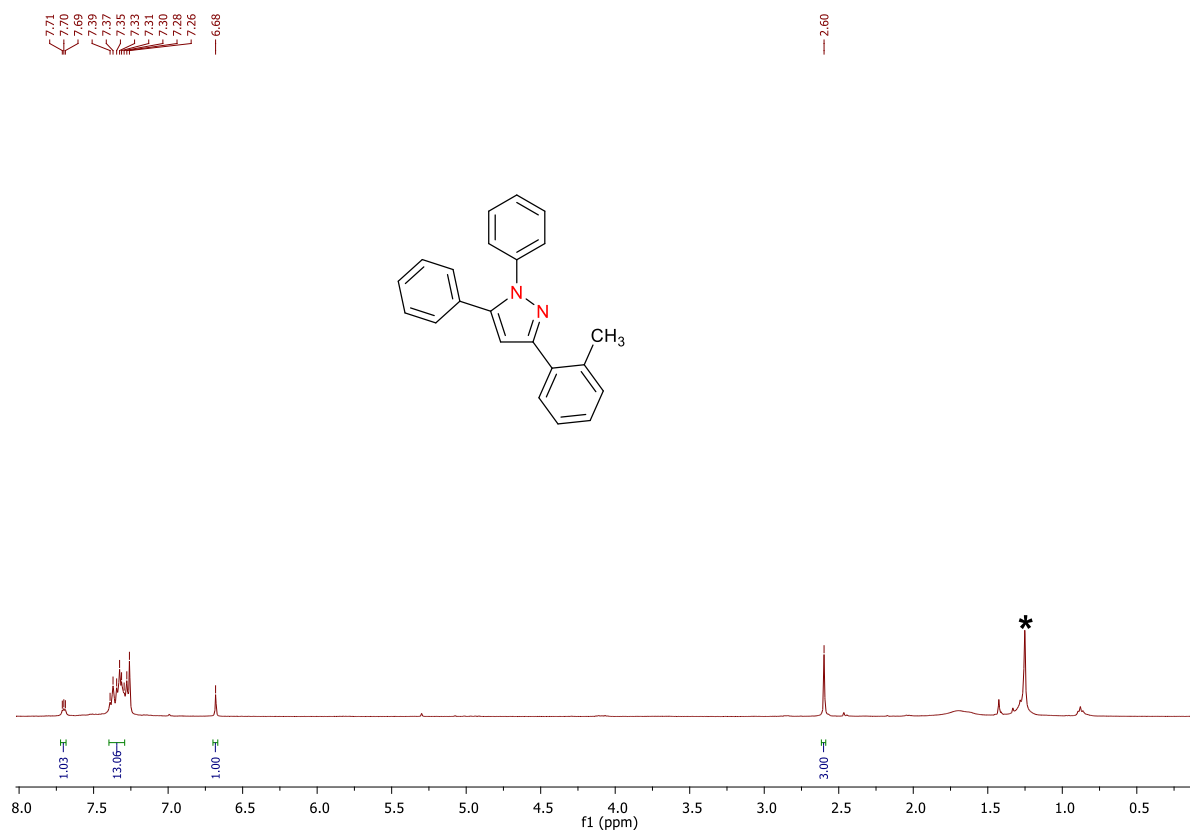

**Figure S27.** <sup>1</sup>H NMR spectrum of **8a** (400 MHz in CDCl<sub>3</sub>). (\*hexane)

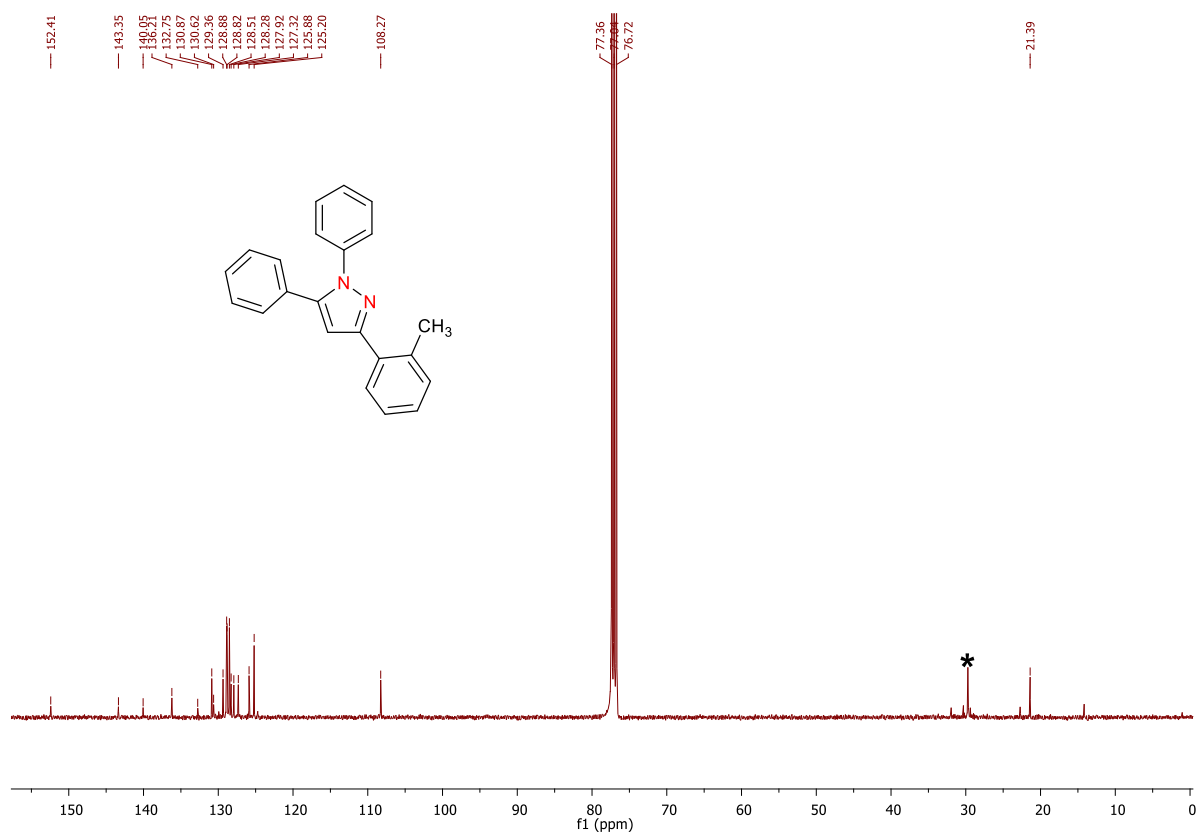

**Figure S28.** <sup>13</sup>C NMR spectrum of **8a** (100 MHz in CDCl<sub>3</sub>). (\*hexane)

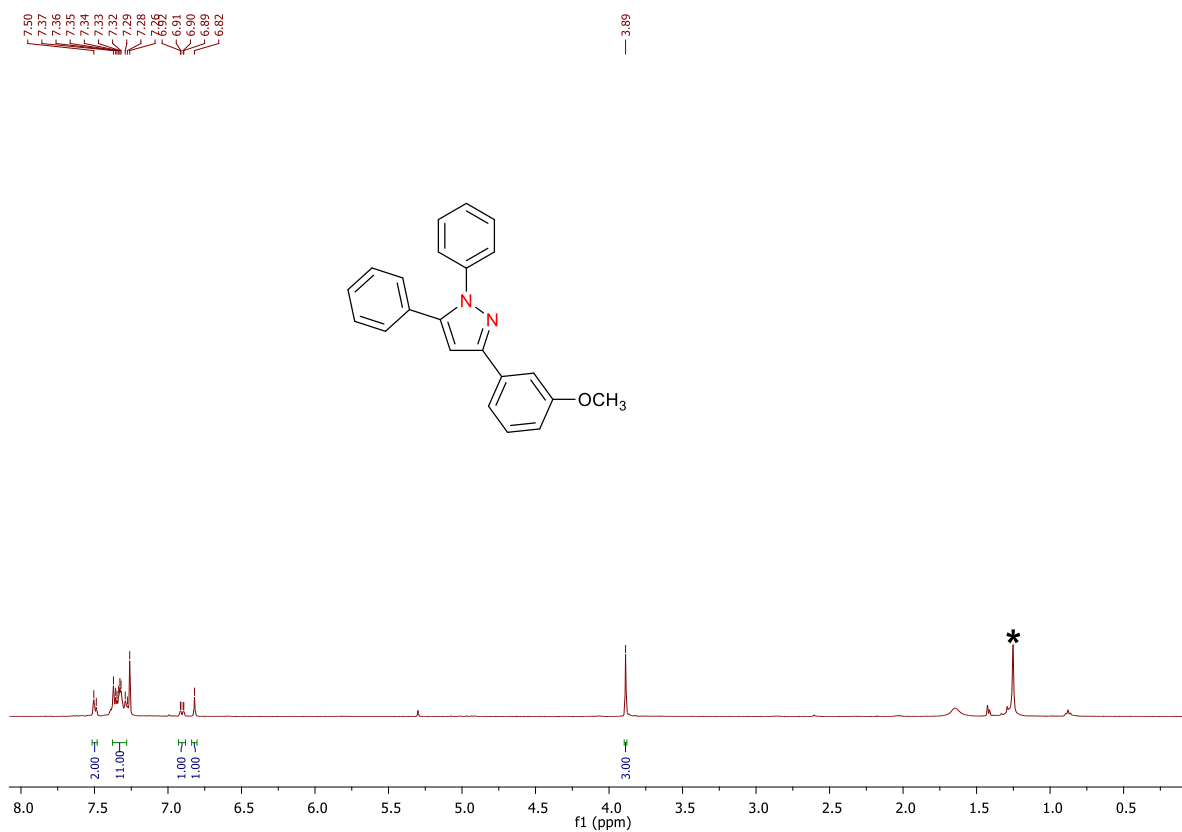

**Figure S29.** <sup>1</sup>H NMR spectrum of **8b** (400 MHz in CDCl<sub>3</sub>). (\*hexane)

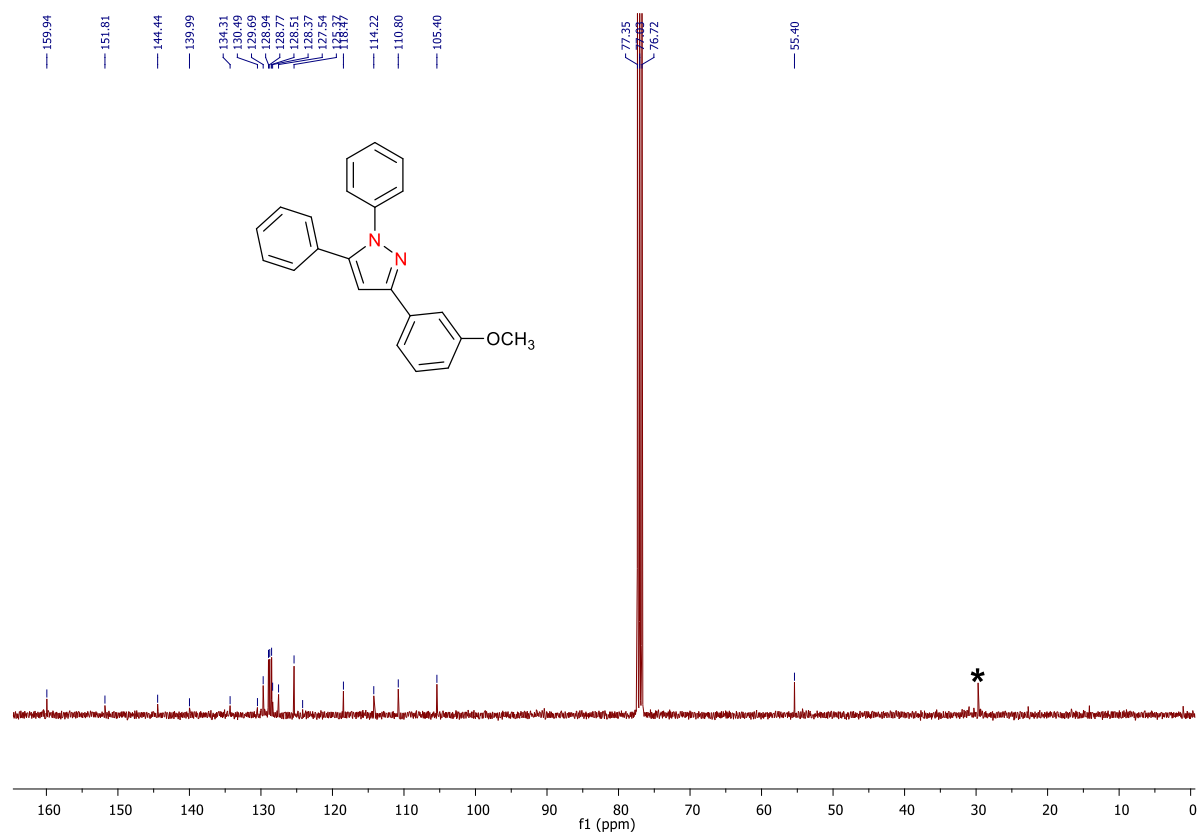

**Figure S30.** <sup>13</sup>C NMR spectrum of **8b** (100 MHz in CDCl<sub>3</sub>). (\*hexane)

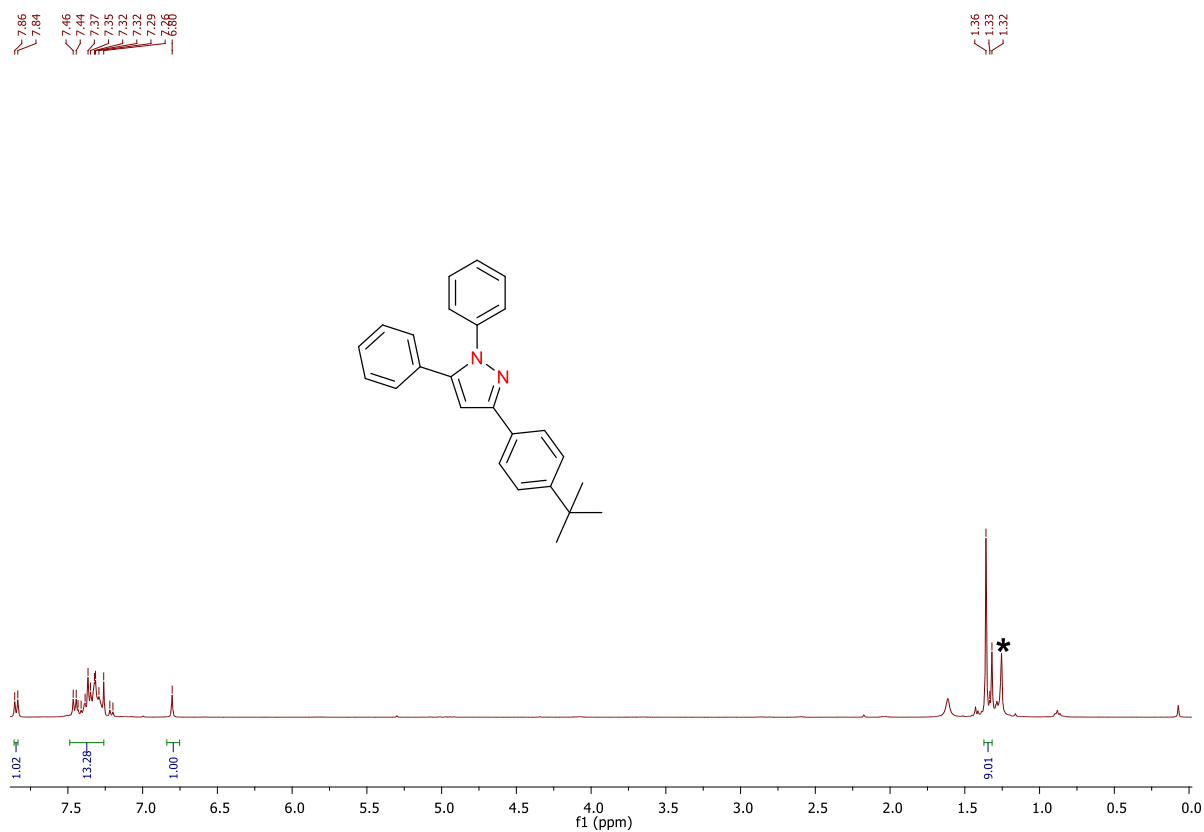

**Figure S31.** <sup>1</sup>H NMR spectrum of **8c** (400 MHz in CDCl<sub>3</sub>). (\*hexane)

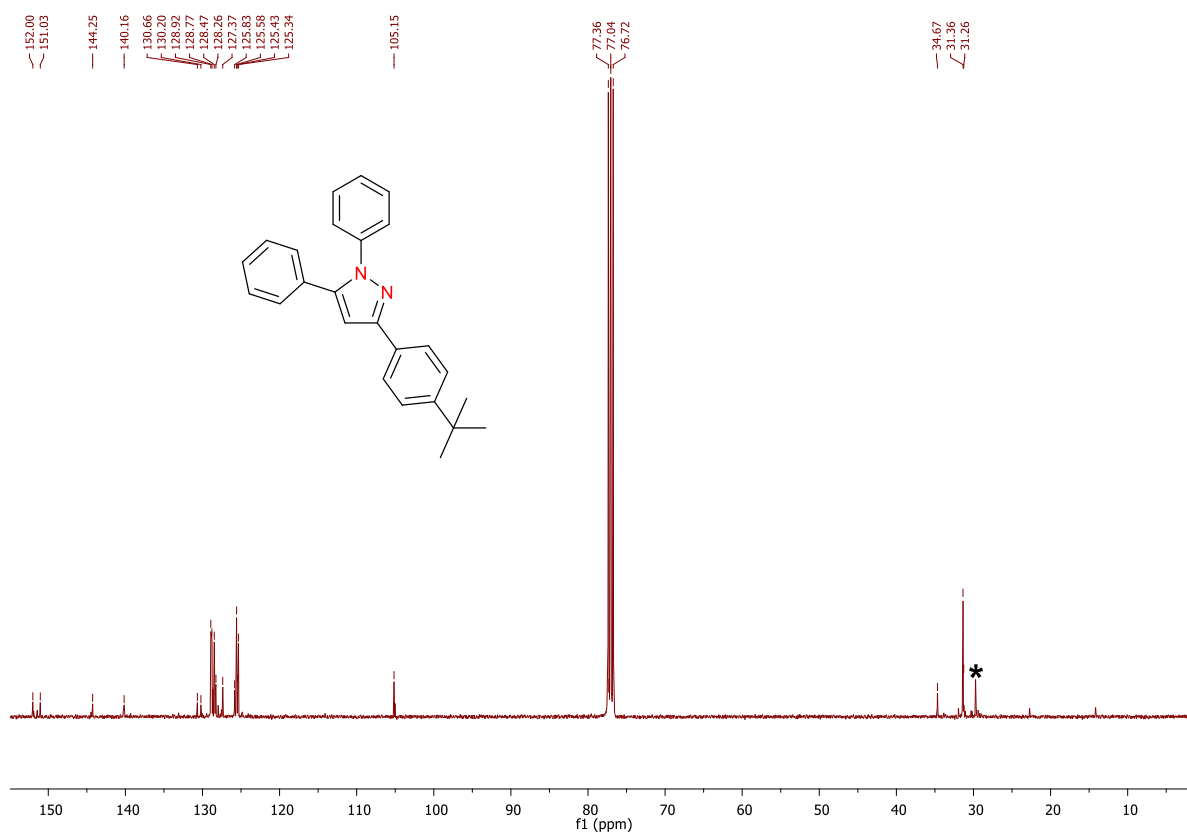

**Figure S32.** <sup>13</sup>C NMR spectrum of **8c** (100 MHz in CDCl<sub>3</sub>). (\*hexane)

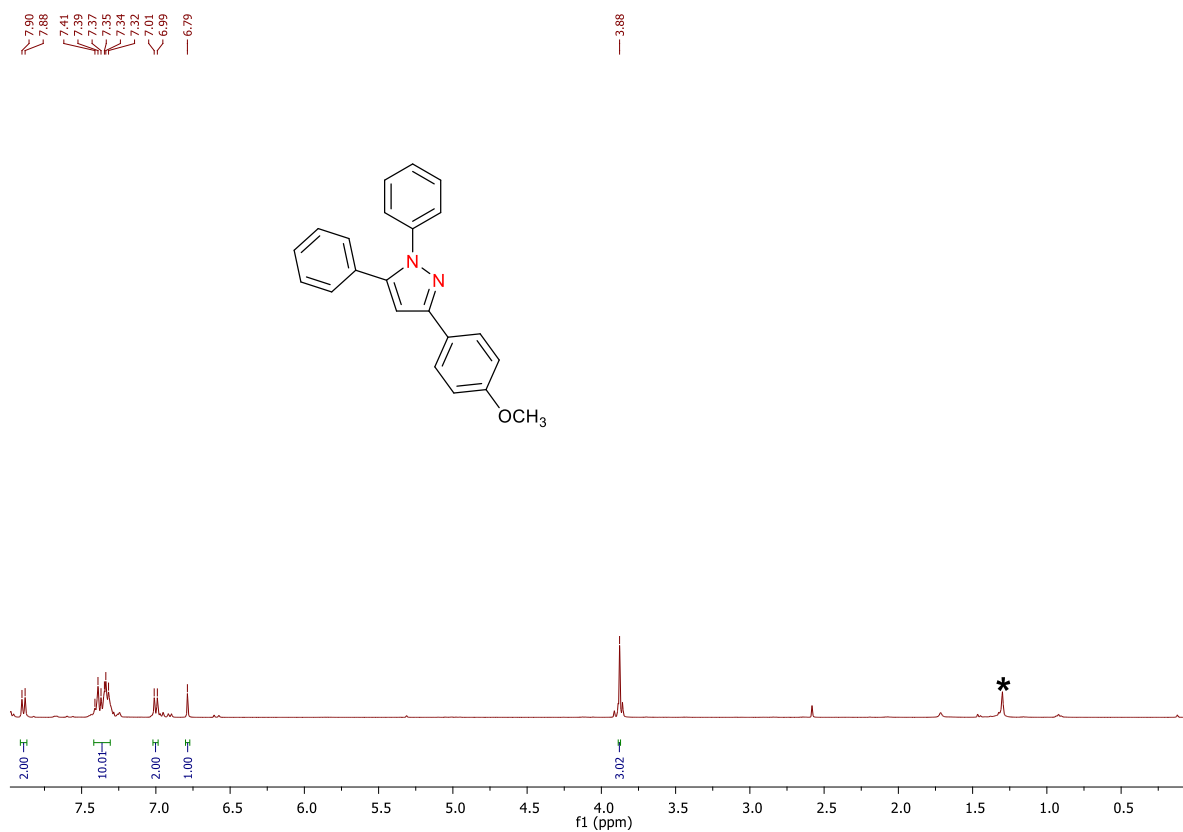

**Figure S33.** <sup>1</sup>H NMR spectrum of **8d** (400 MHz in CDCl<sub>3</sub>). (\*hexane)

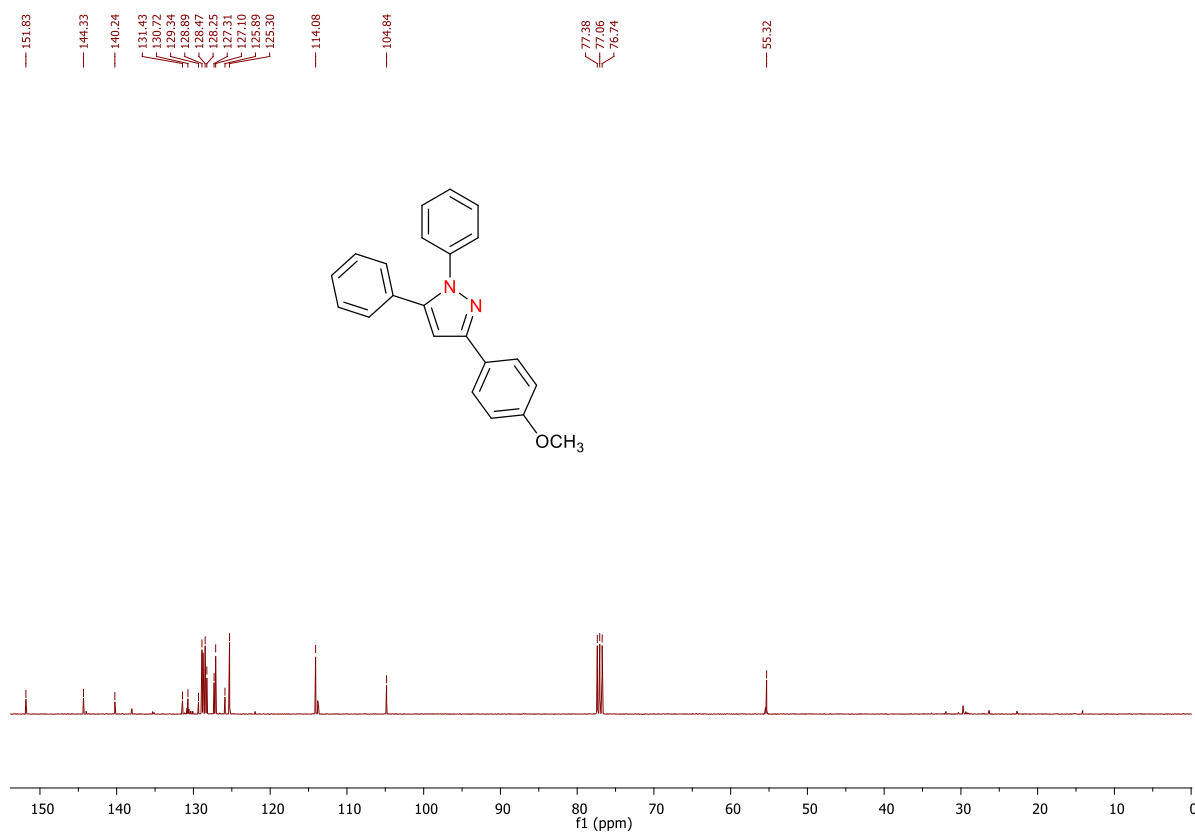

**Figure S34.** <sup>13</sup>C NMR spectrum of **8d** (100 MHz in CDCl<sub>3</sub>).

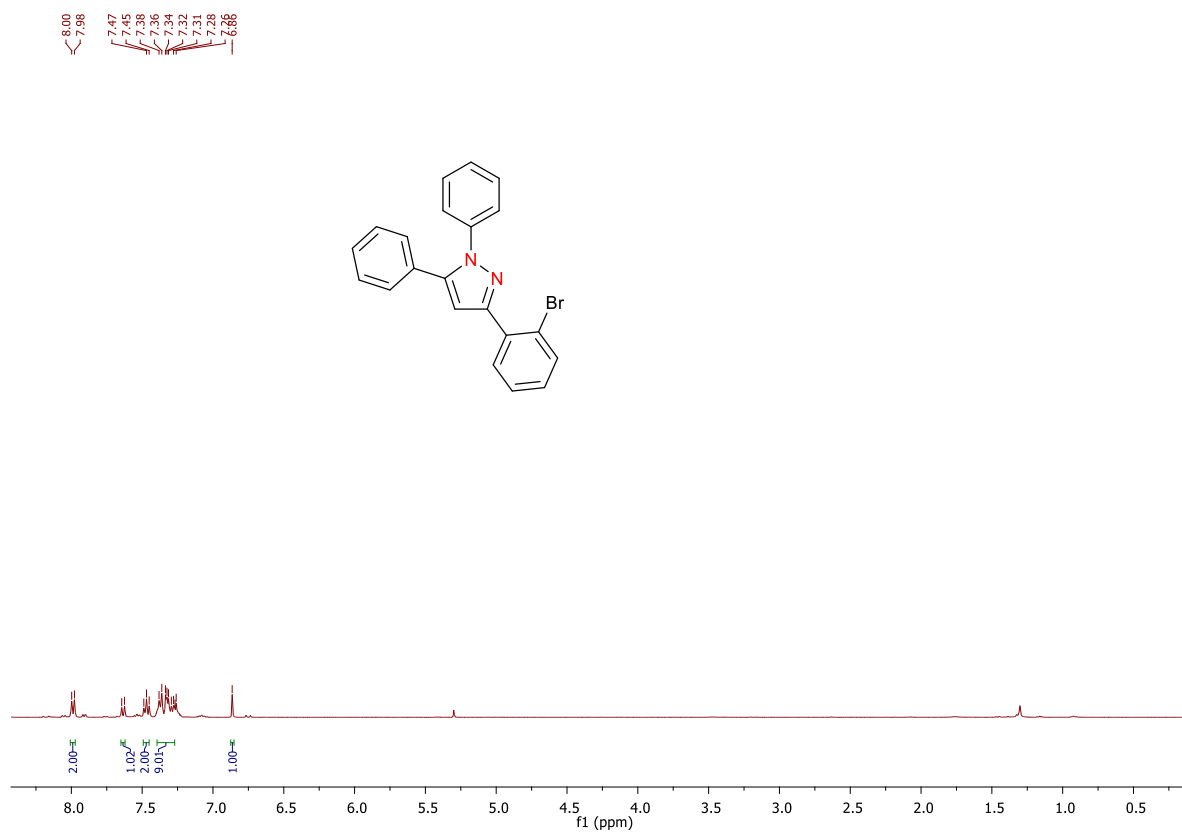

**Figure S35.** <sup>1</sup>H NMR spectrum of **8e** (400 MHz in CDCl<sub>3</sub>).

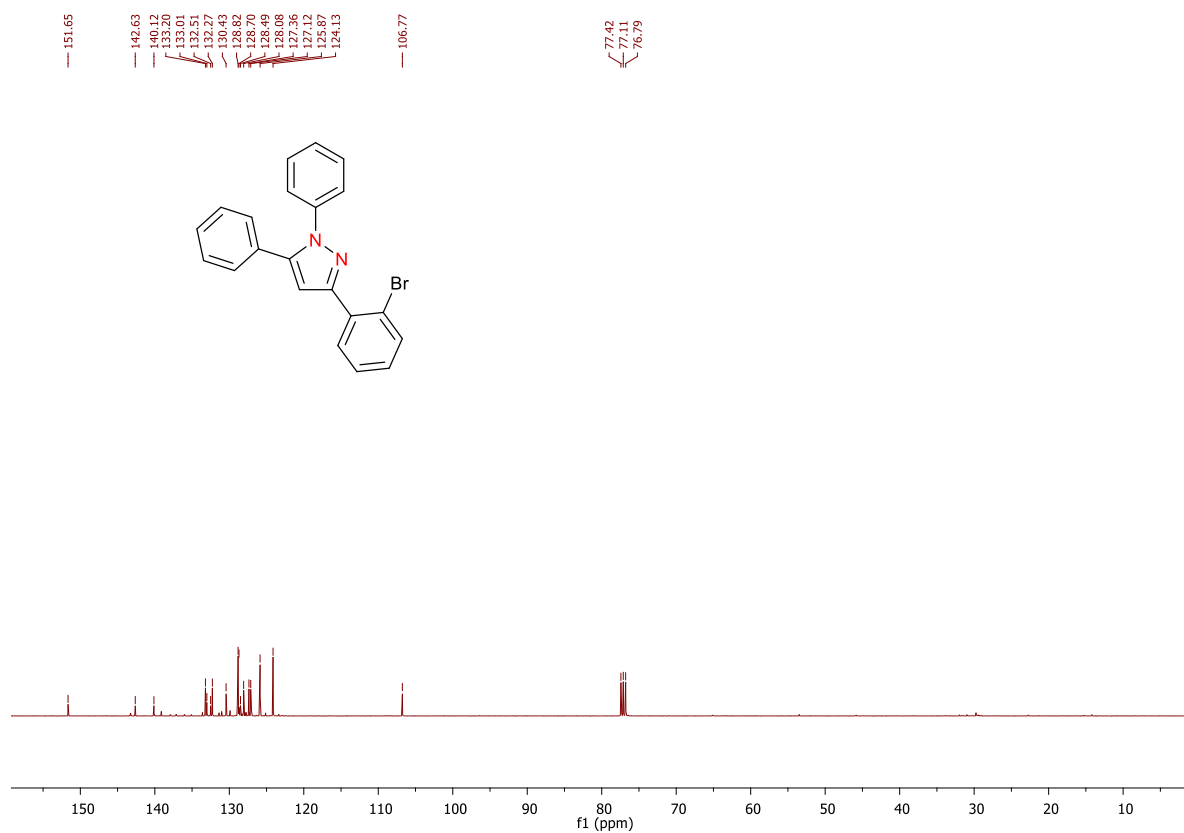

**Figure S36.** <sup>13</sup>C NMR spectrum of **8e** (100 MHz in CDCl<sub>3</sub>).

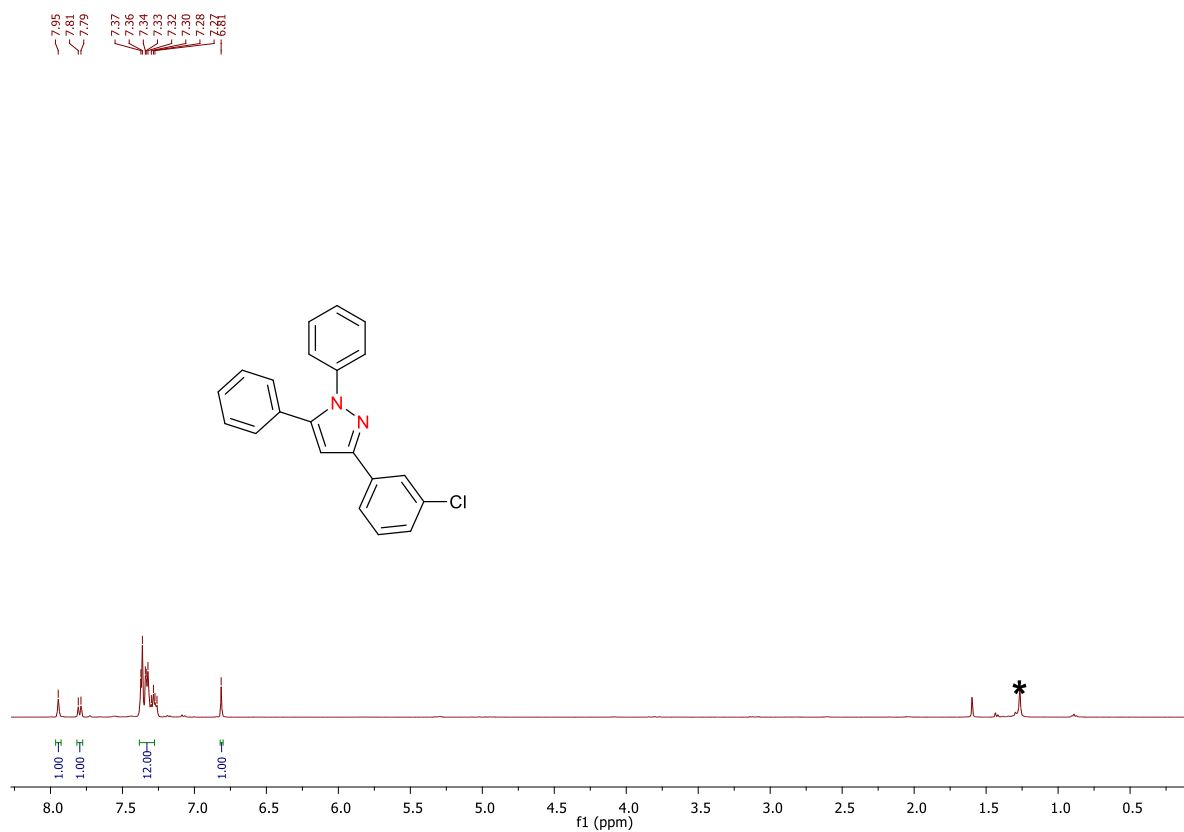

**Figure S37.** <sup>1</sup>H NMR spectrum of **8f** (400 MHz in CDCl<sub>3</sub>). (\*hexane)

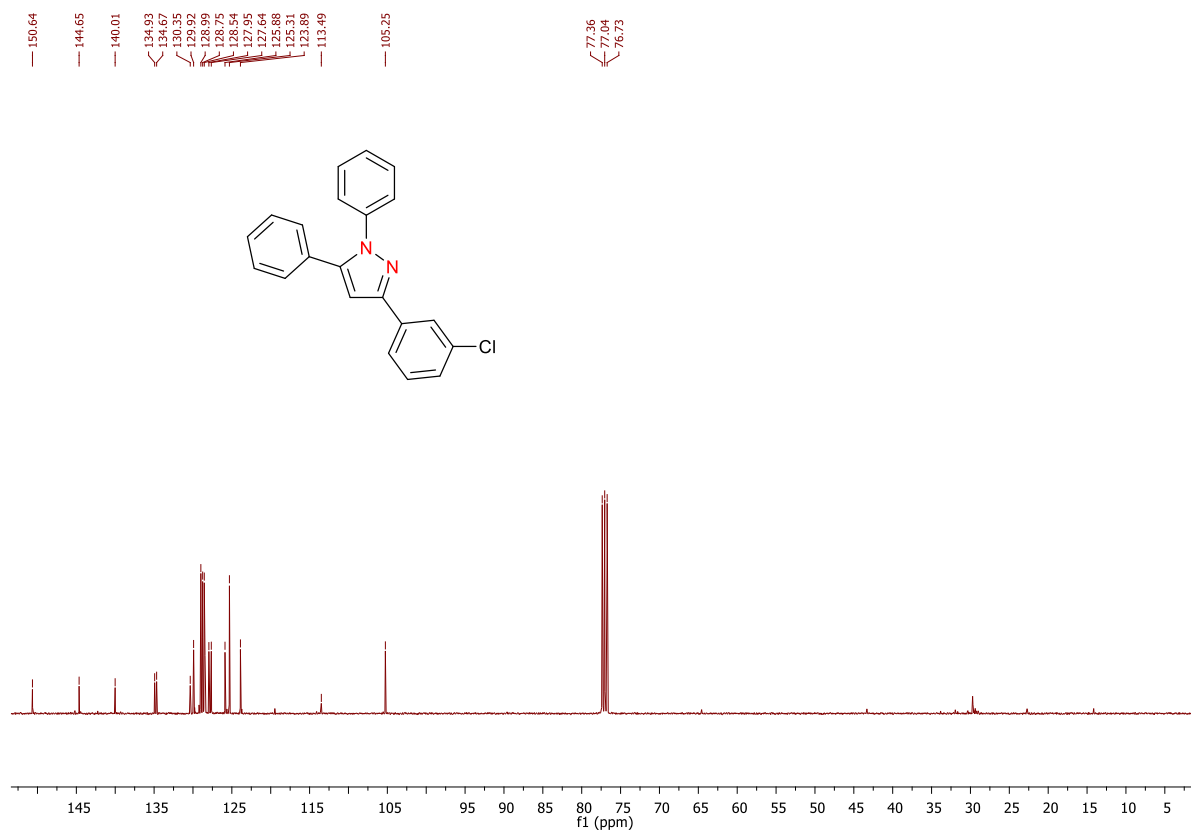

**Figure S38.** <sup>13</sup>C NMR spectrum of **8f** (100 MHz in CDCl<sub>3</sub>).



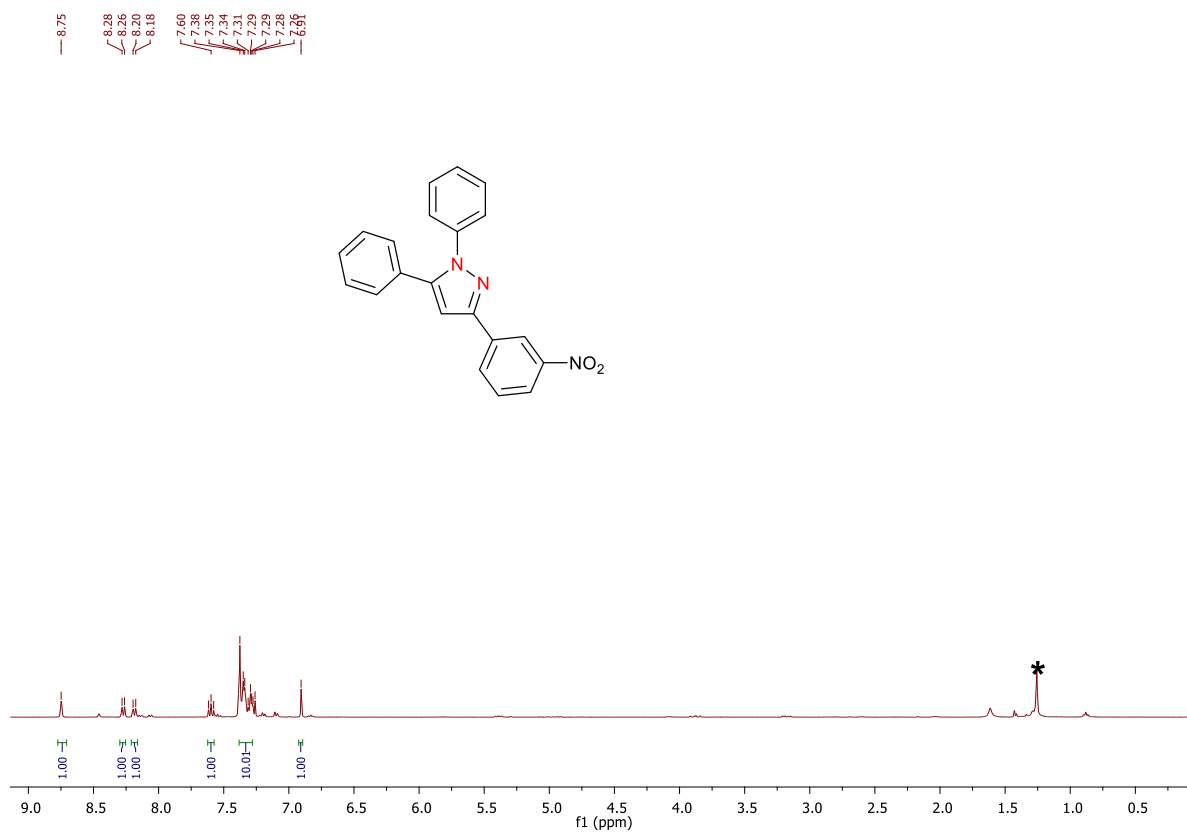

**Figure S39.** <sup>1</sup>H NMR spectrum of **8g** (400 MHz in CDCl<sub>3</sub>). (\*hexane)

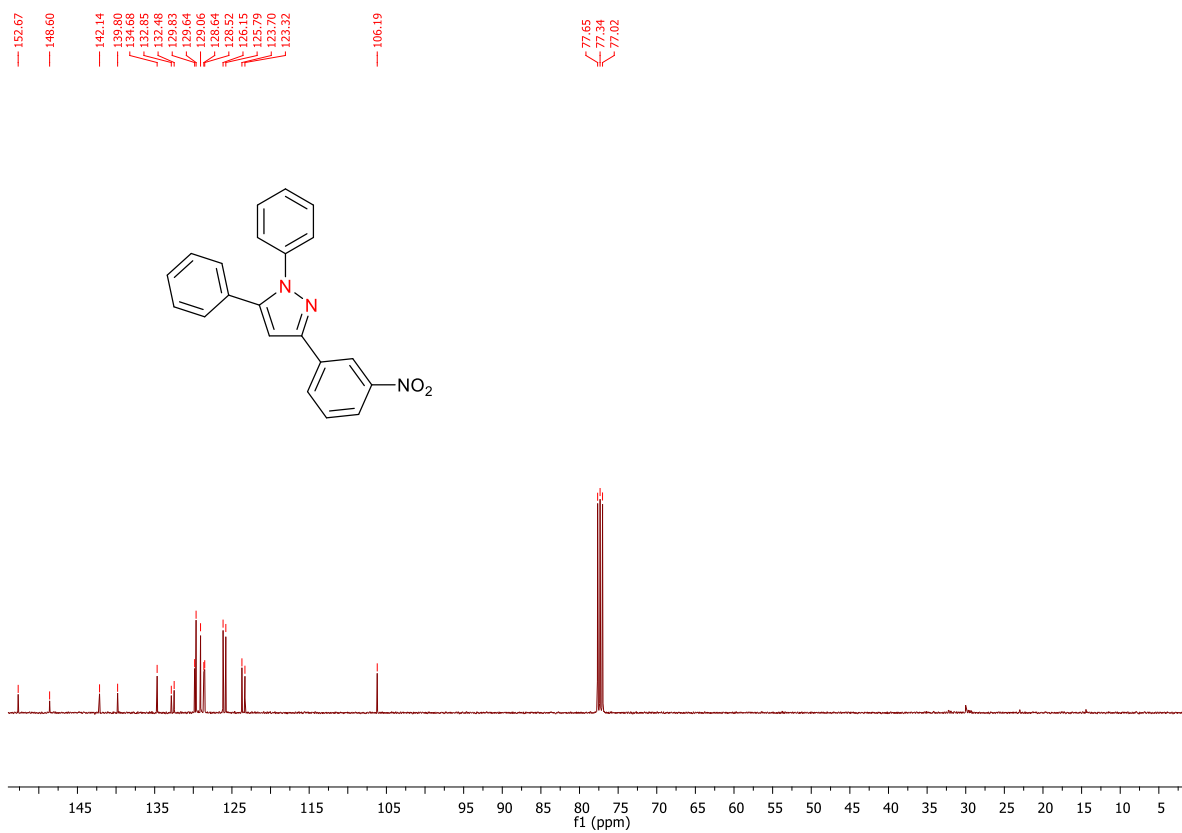

**Figure S40.** <sup>13</sup>C NMR spectrum of **8g** (100 MHz in CDCl<sub>3</sub>).

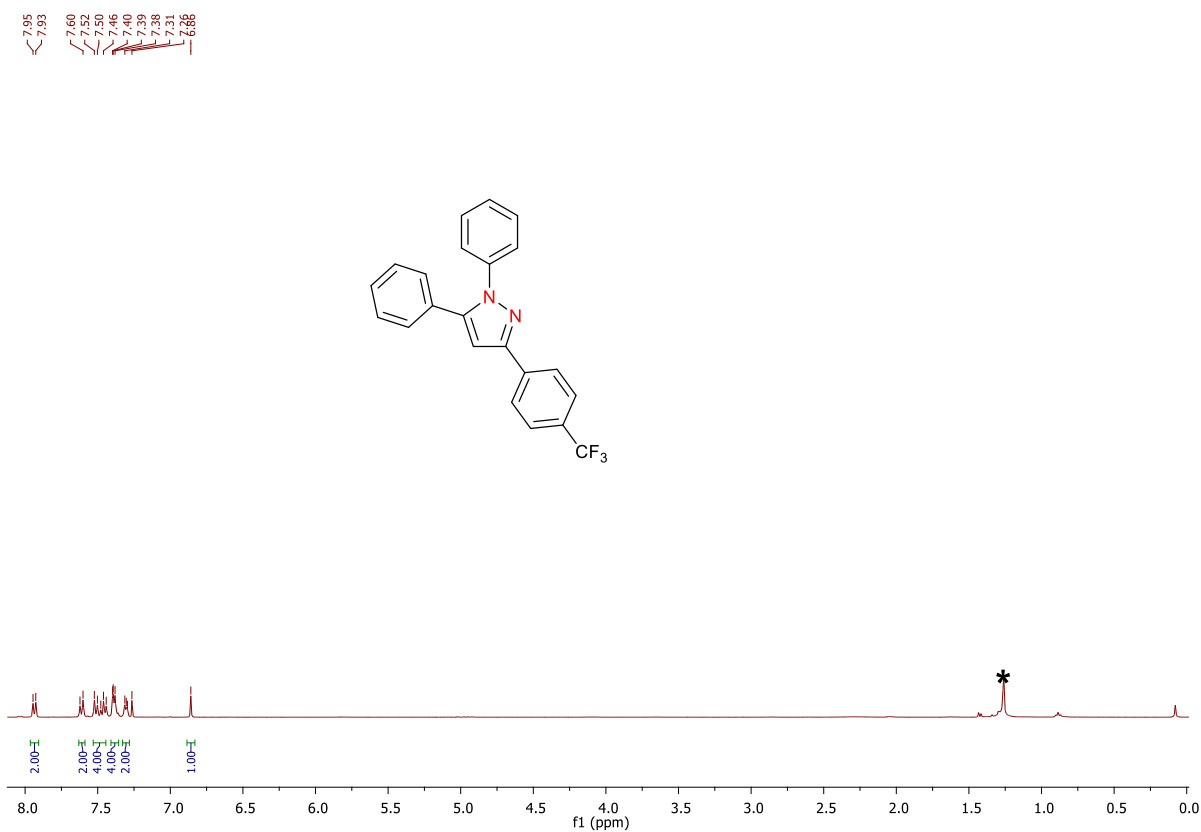

**Figure S41.** <sup>1</sup>H NMR spectrum of **8h** (400 MHz in CDCl<sub>3</sub>). (\*hexane)

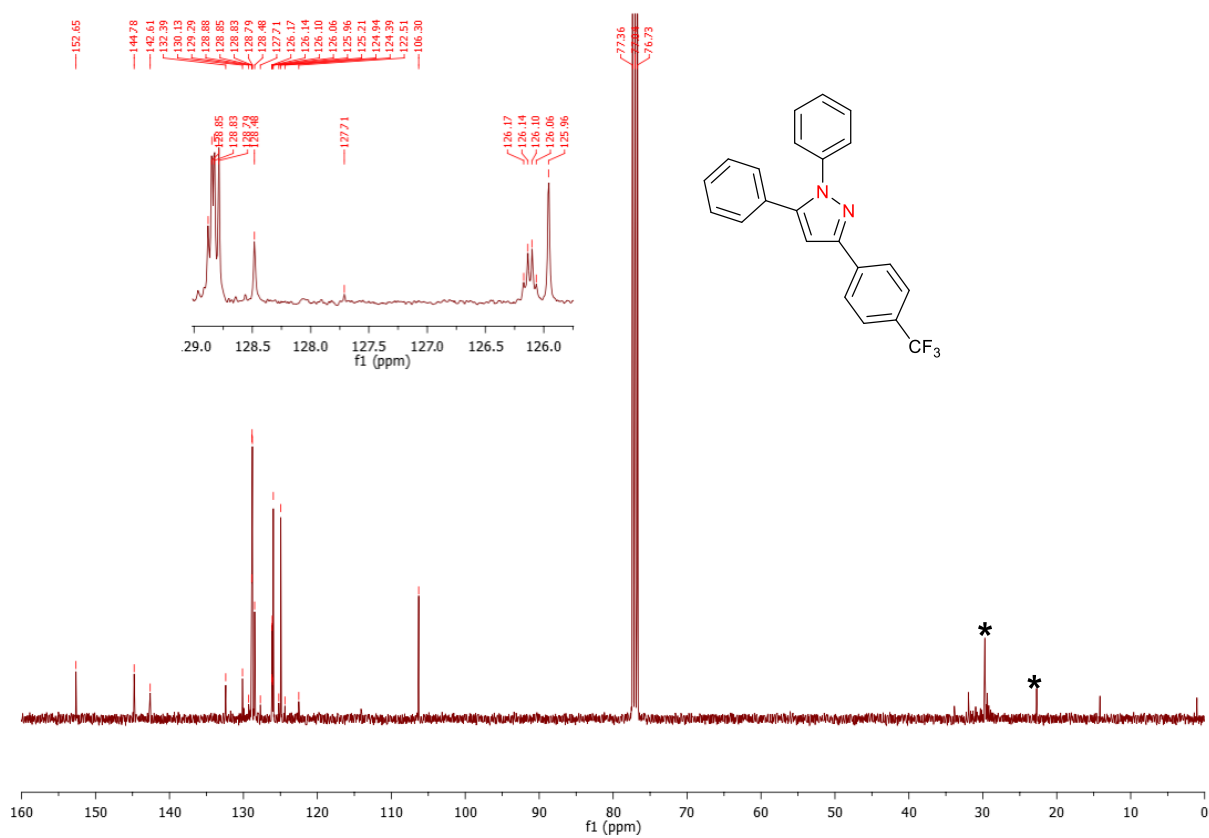

**Figure S42.** <sup>13</sup>C NMR spectrum of **8h** (100 MHz in CDCl<sub>3</sub>). (\*hexane)

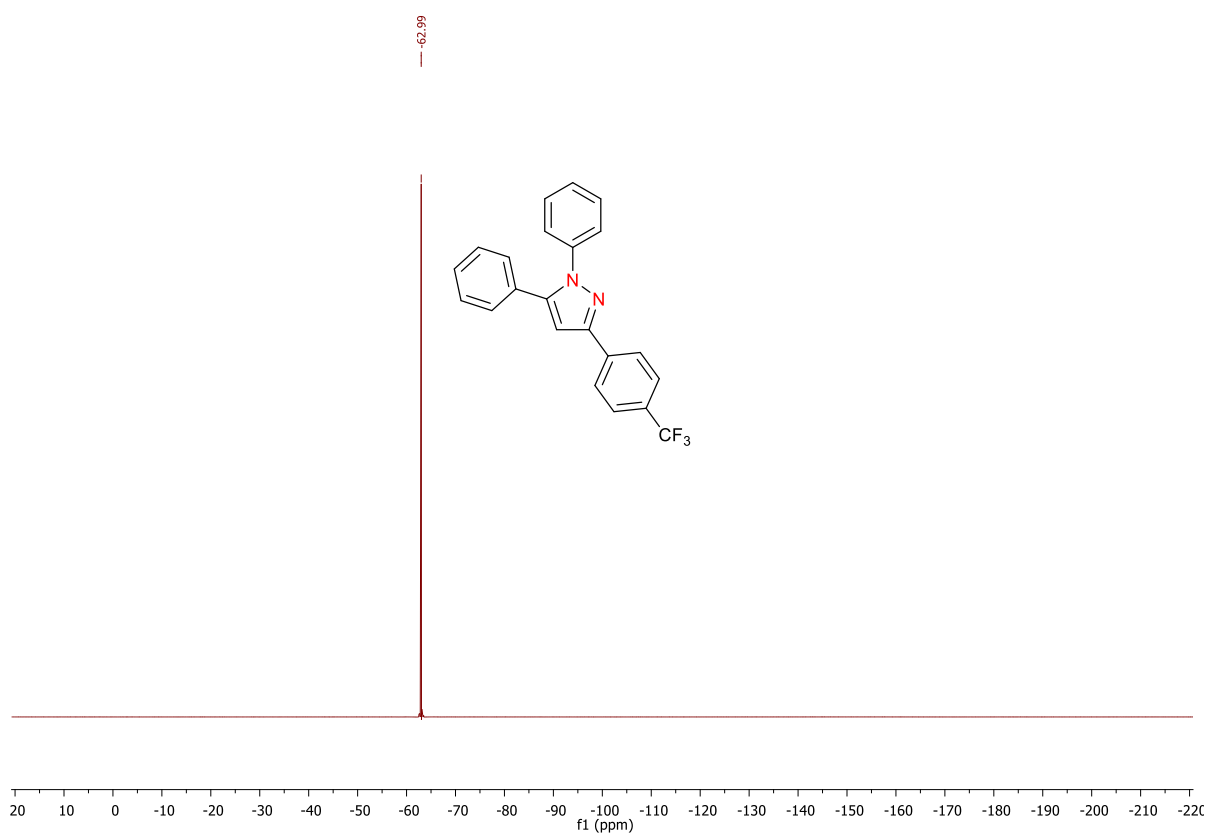

**Figure S43.**  $^{19}\text{F}$  NMR spectrum of **8h** (376 MHz in  $\text{CDCl}_3$ ).

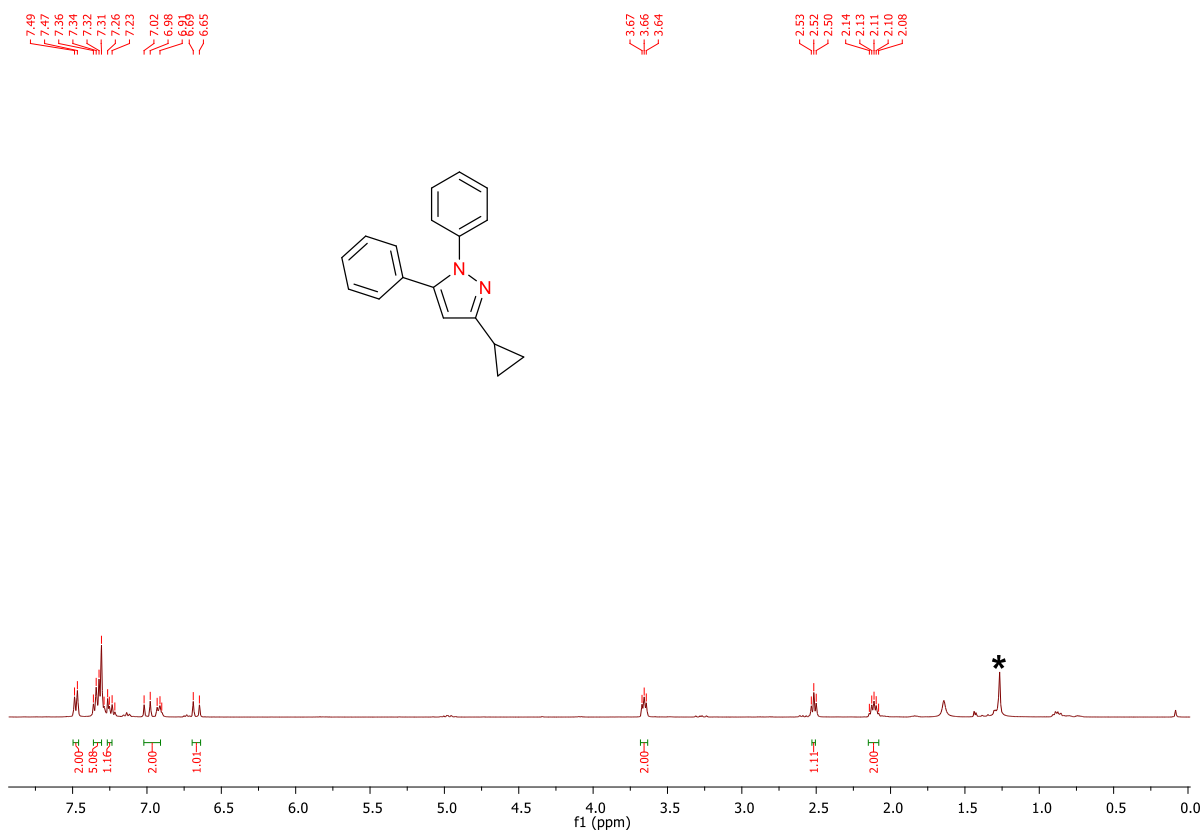

**Figure S44.** <sup>1</sup>H NMR spectrum of **8i** (400 MHz in CDCl<sub>3</sub>). (\*hexane)

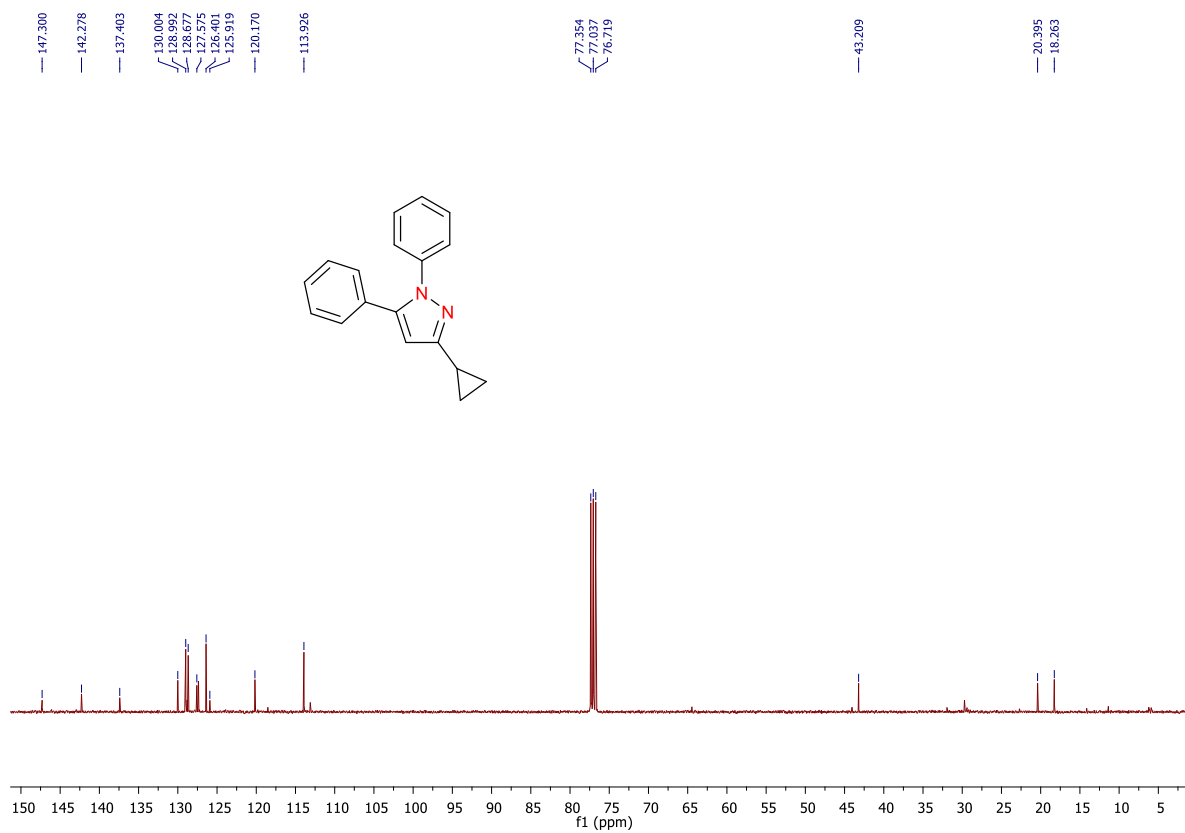

**Figure S45.** <sup>13</sup>C NMR spectrum of **8i** (100 MHz in CDCl<sub>3</sub>).

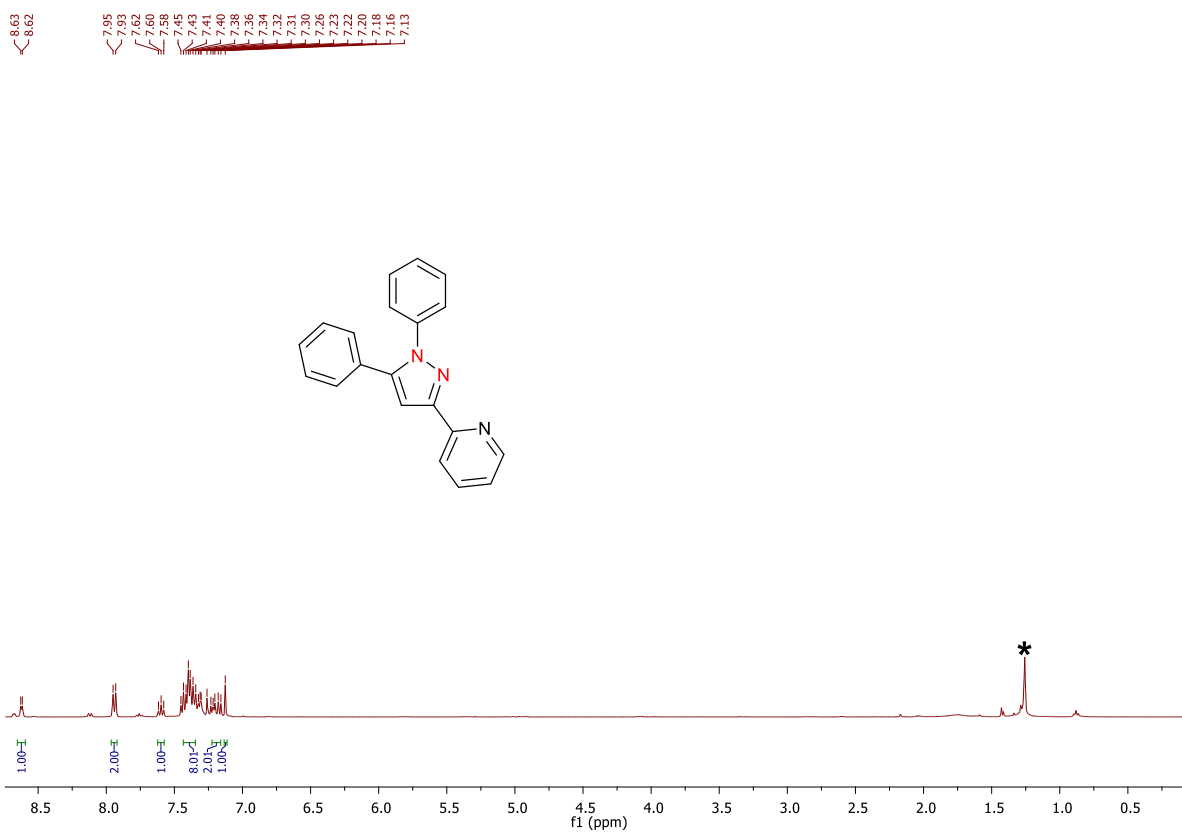

**Figure S46.** <sup>1</sup>H NMR spectrum of **8j** (400 MHz in CDCl<sub>3</sub>). (\*hexane)

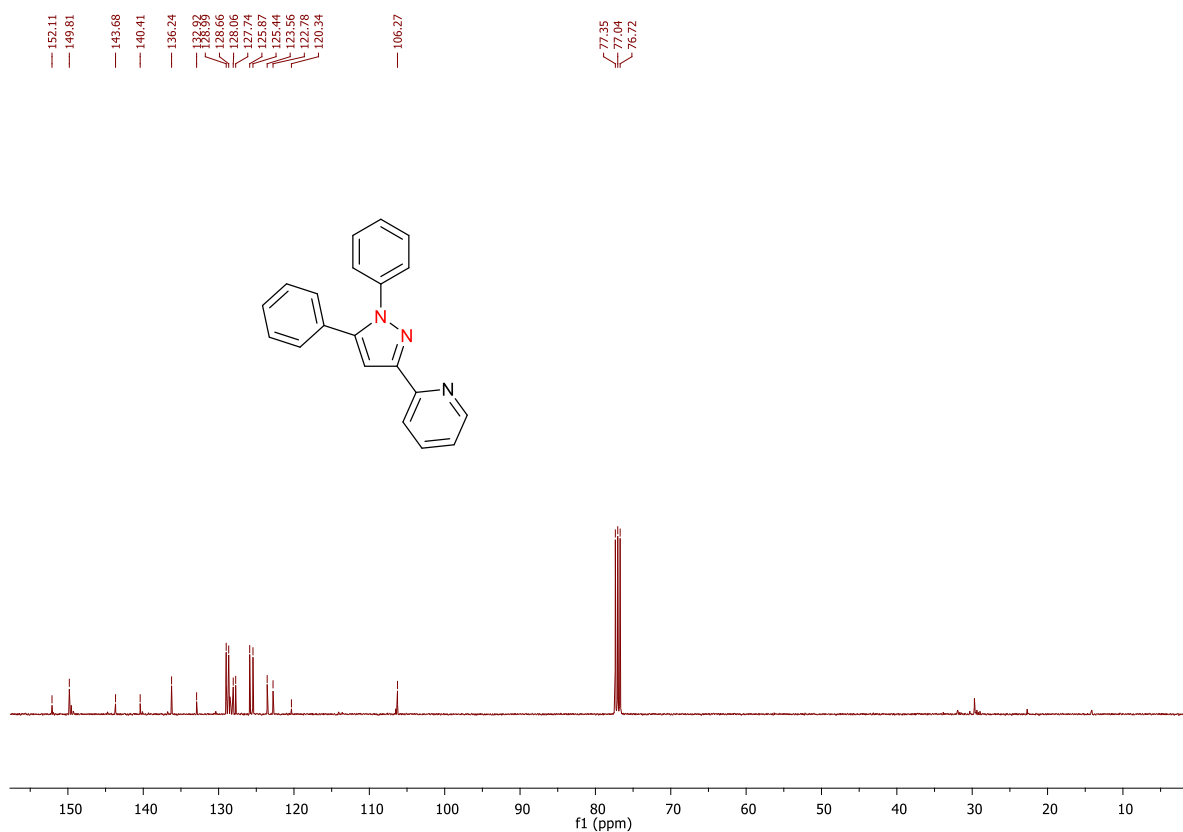

**Figure S47.** <sup>13</sup>C NMR spectrum of **8j** (100 MHz in CDCl<sub>3</sub>).

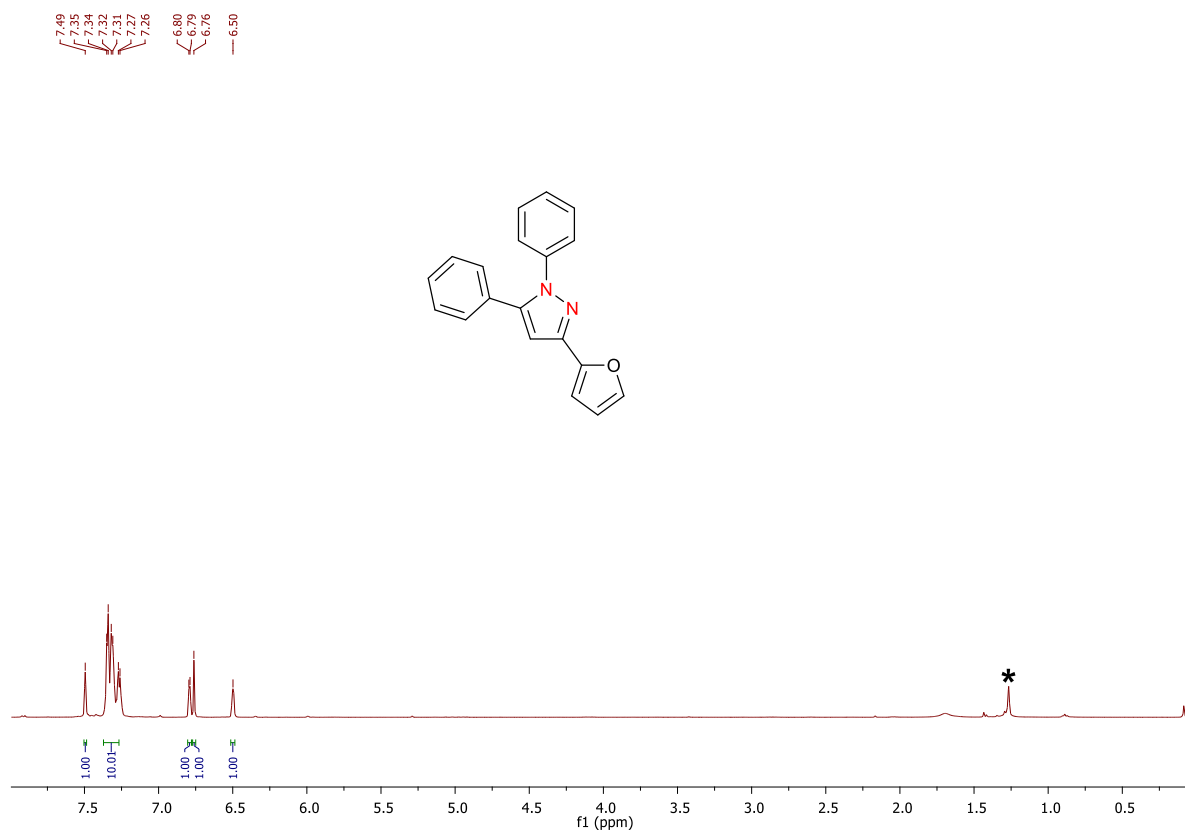

**Figure S48.**  $^1\text{H}$  NMR spectrum of **8k** (400 MHz in  $\text{CDCl}_3$ ). (\*hexane)

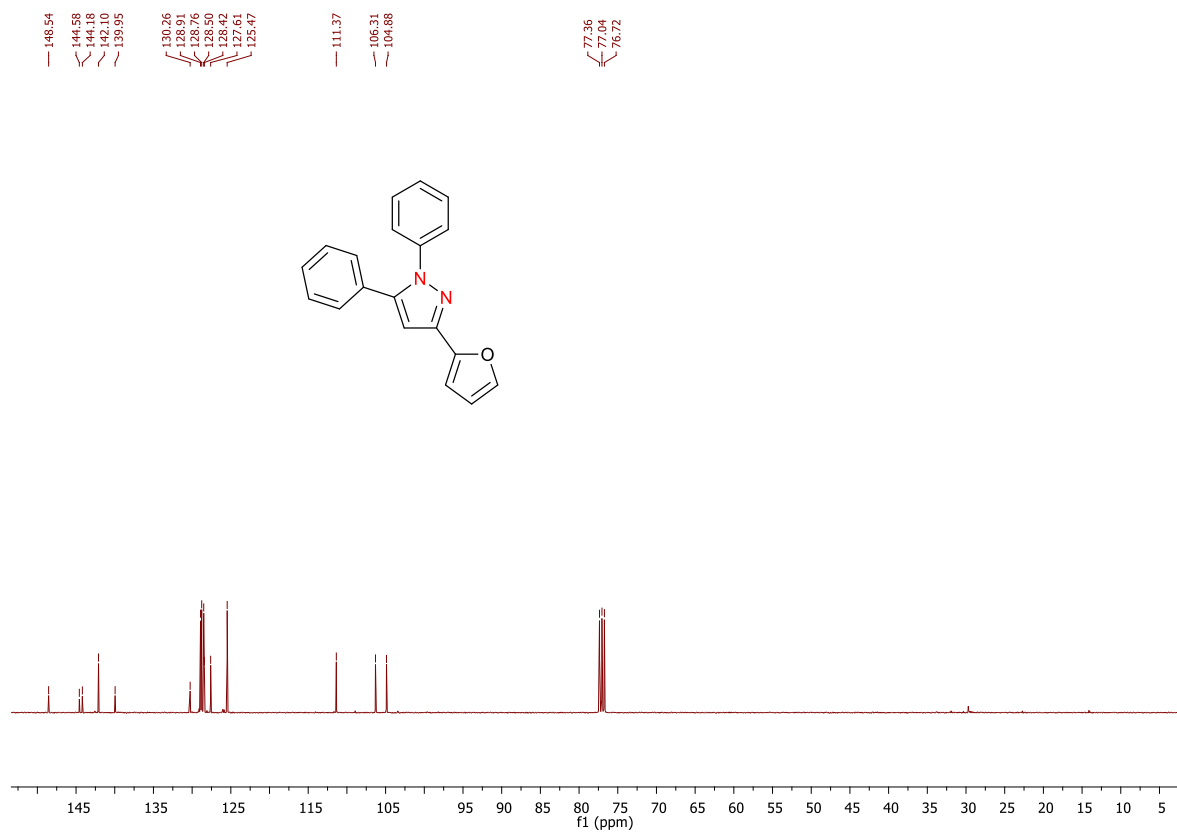

**Figure S49.**  $^{13}\text{C}$  NMR spectrum of **8k** (100 MHz in  $\text{CDCl}_3$ ).

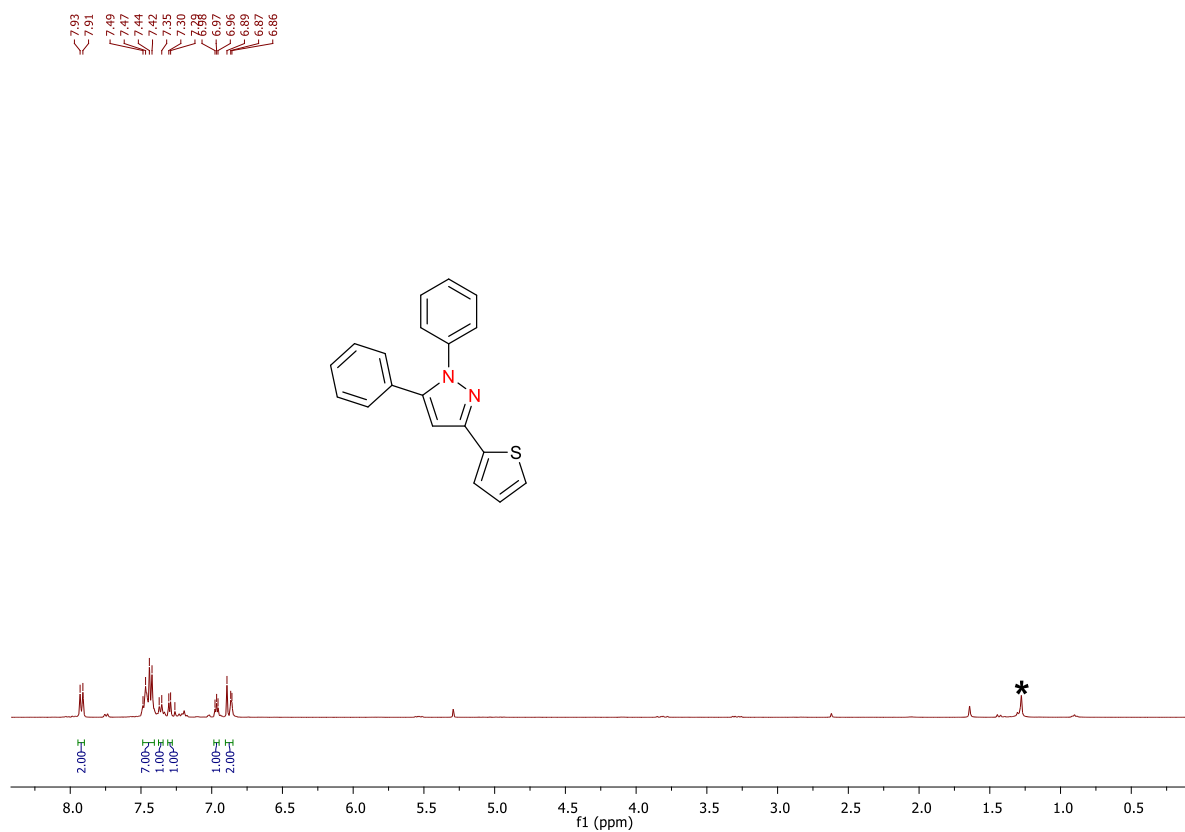

**Figure S50.**  $^1\text{H}$  NMR spectrum of **8l** (400 MHz in  $\text{CDCl}_3$ ). (\*hexane)

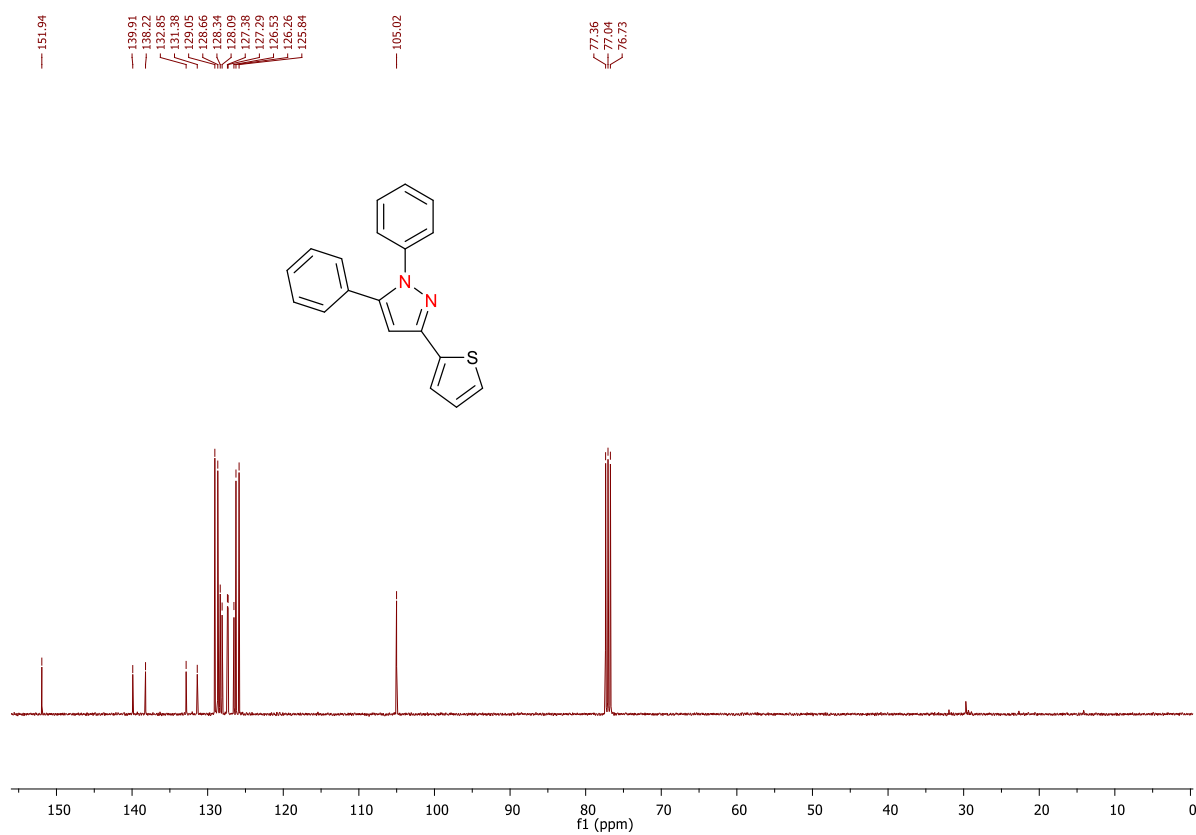

**Figure S51.**  $^{13}\text{C}$  NMR spectrum of **8l** (100 MHz in  $\text{CDCl}_3$ ).

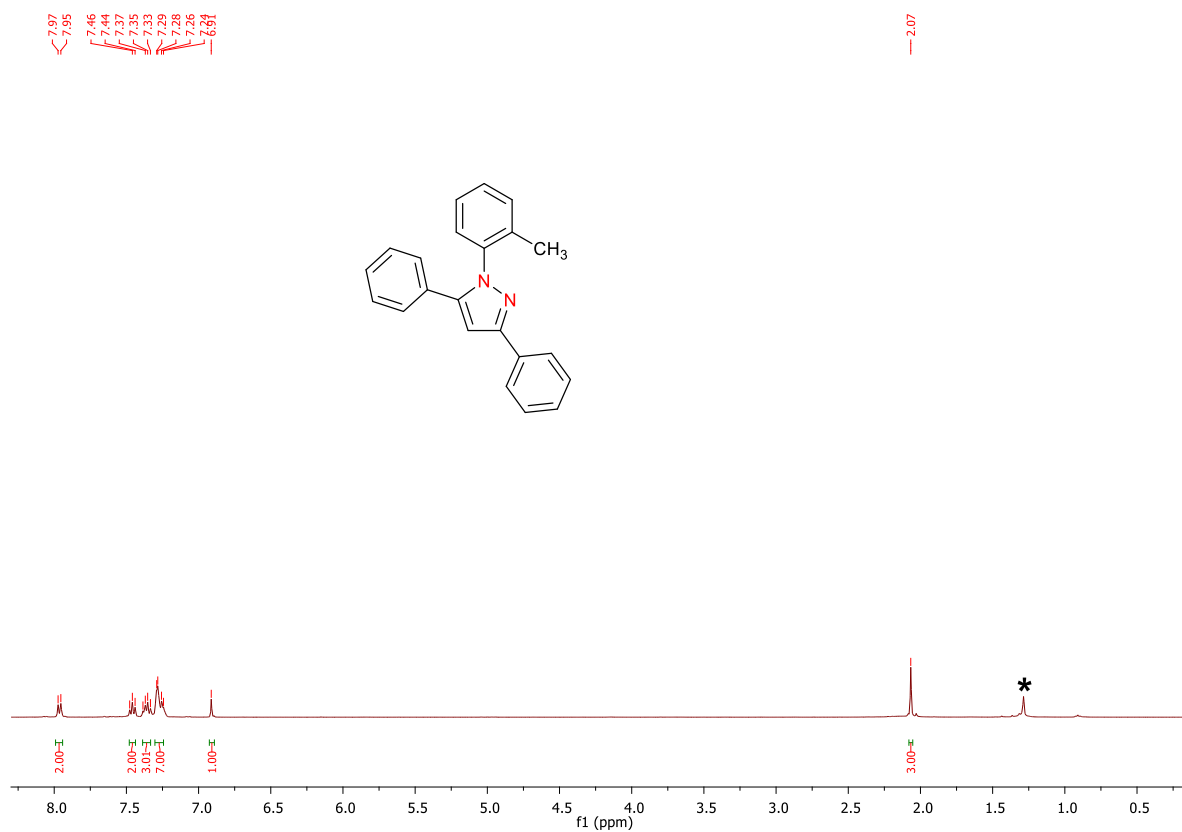

**Figure S52.** <sup>1</sup>H NMR spectrum of **9a** (400 MHz in CDCl<sub>3</sub>). (\* hexane)

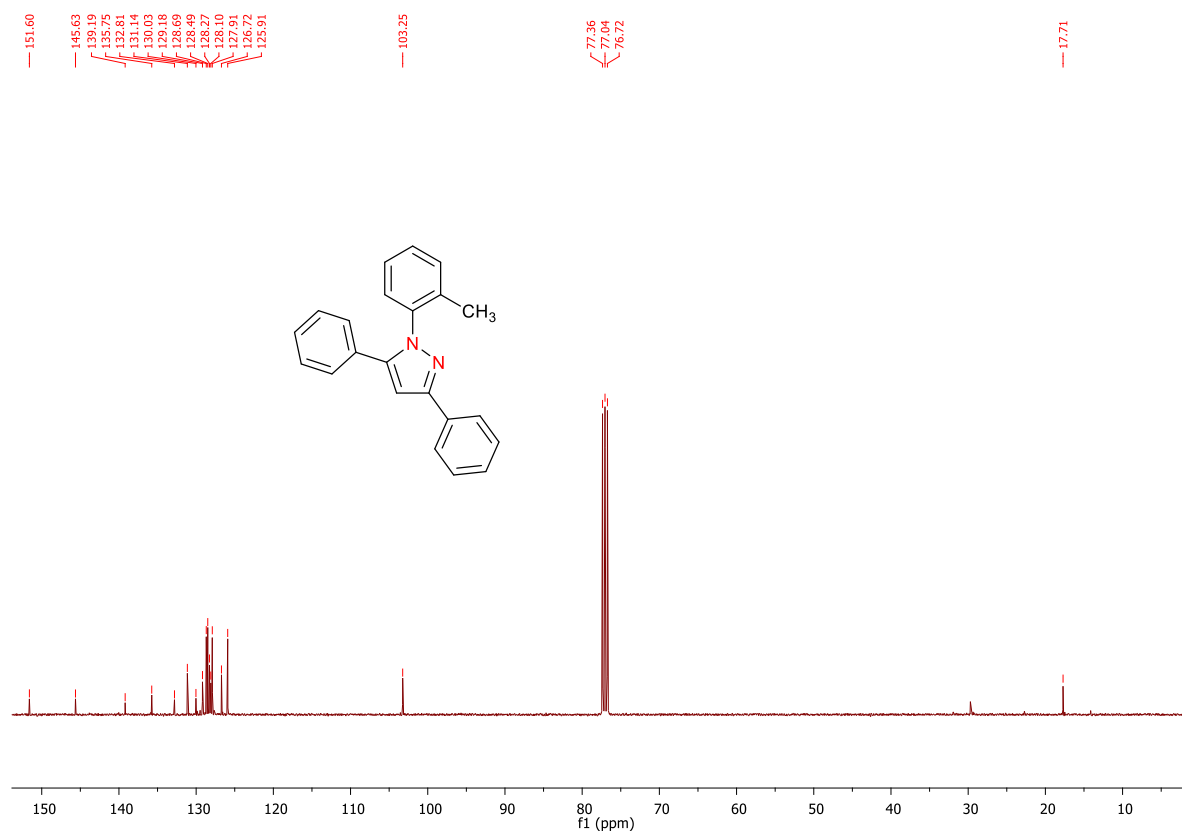

**Figure S53.** <sup>13</sup>C NMR spectrum of **9a** (100 MHz in CDCl<sub>3</sub>).



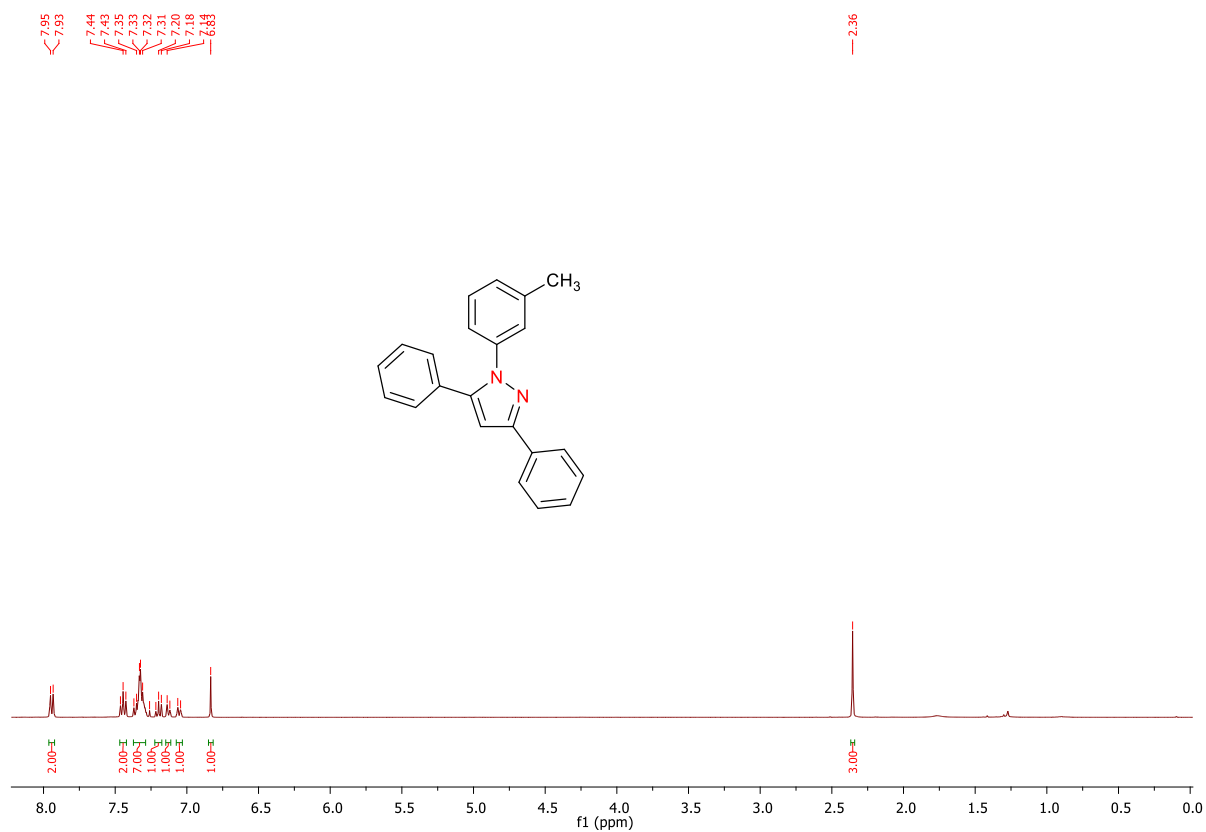

**Figure S54.** <sup>1</sup>H NMR spectrum of **9b** (400 MHz in CDCl<sub>3</sub>).

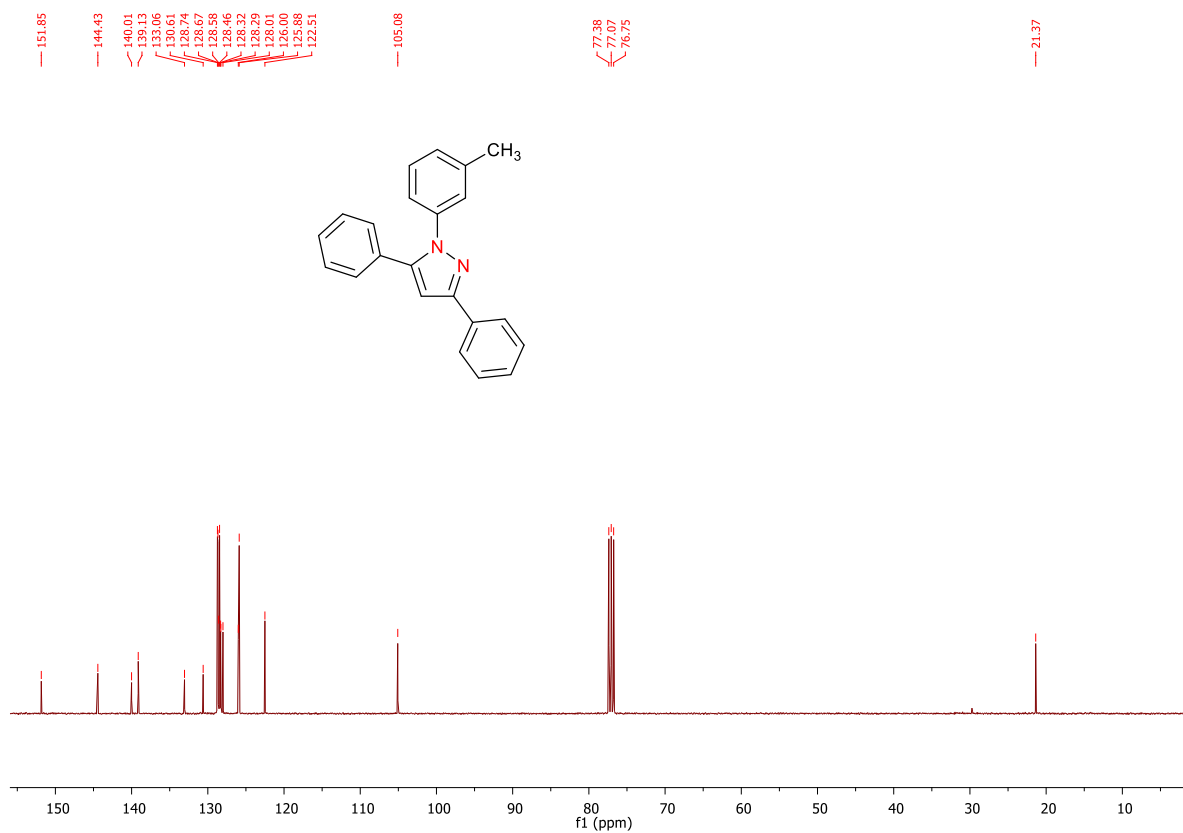

**Figure S55.** <sup>13</sup>C NMR spectrum of **9b** (100 MHz in CDCl<sub>3</sub>).

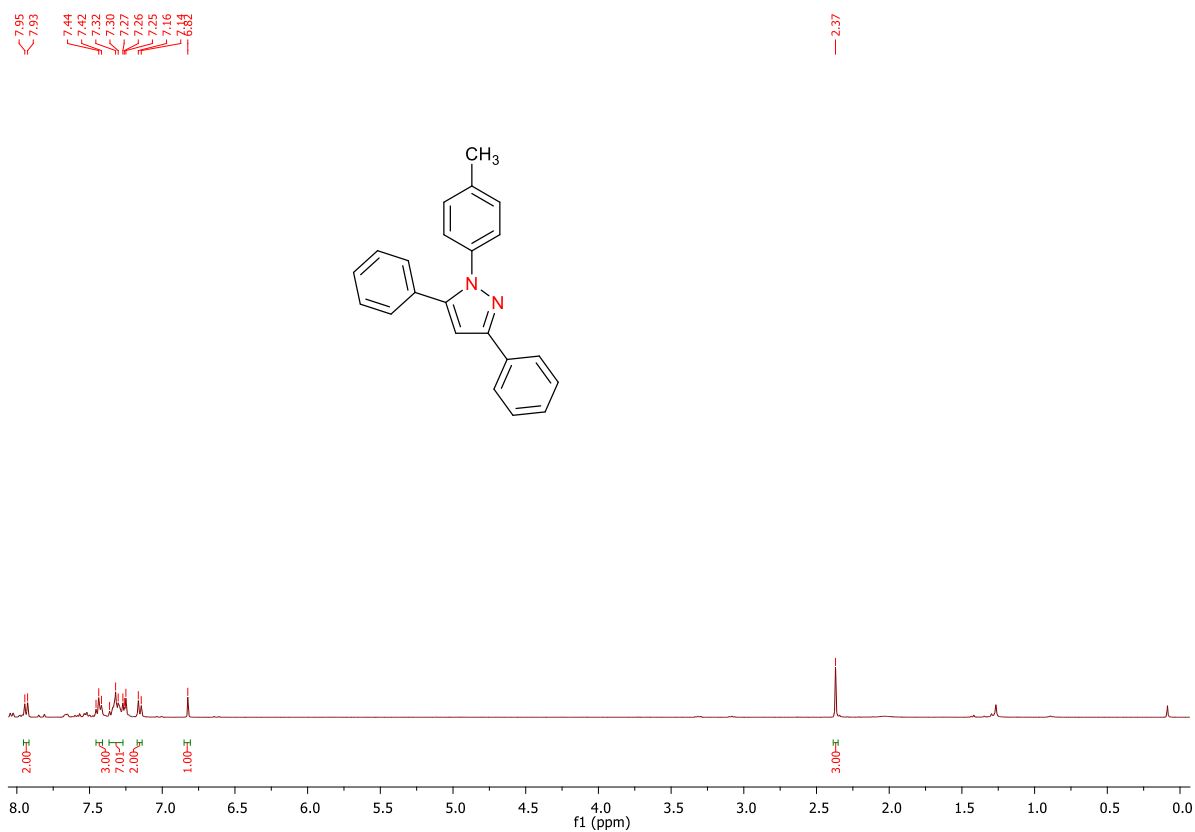

**Figure S56.** <sup>1</sup>H NMR spectrum of **9c** (400 MHz in CDCl<sub>3</sub>).

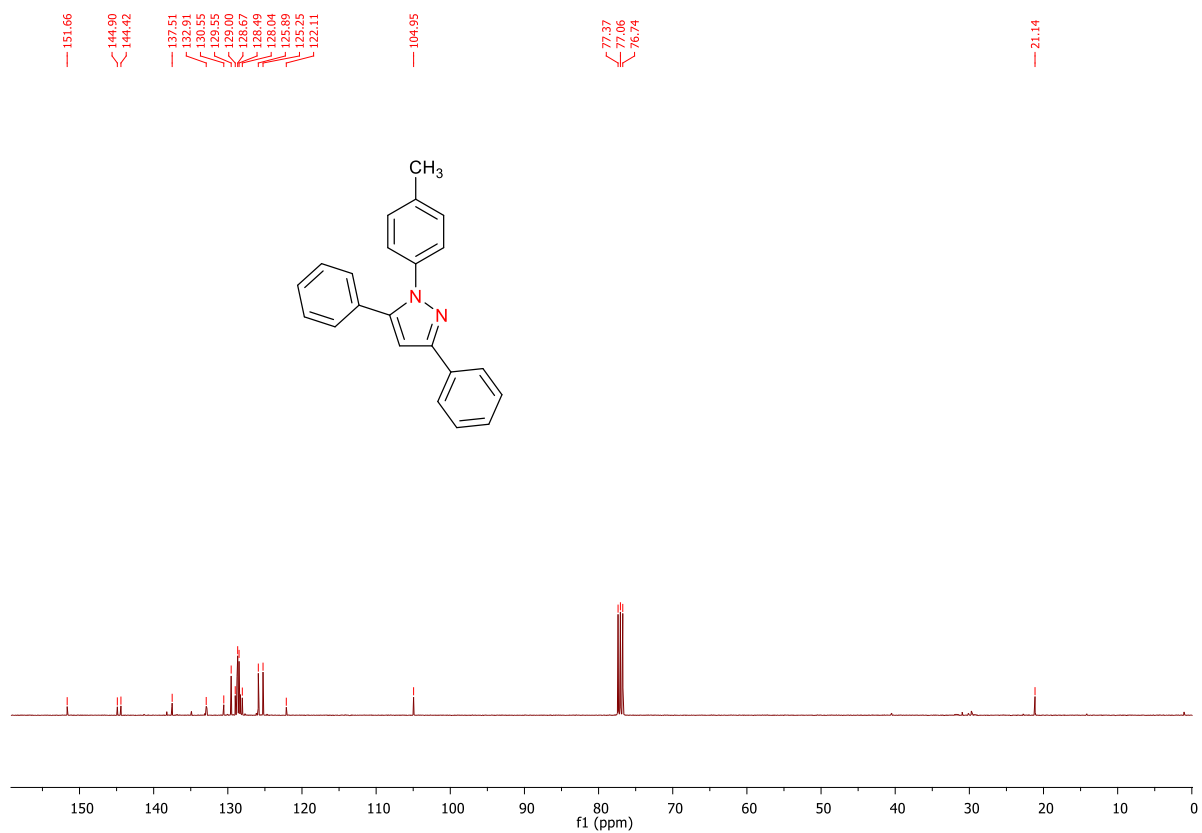

**Figure S57.** <sup>13</sup>C NMR spectrum of **9c** (100 MHz in CDCl<sub>3</sub>).

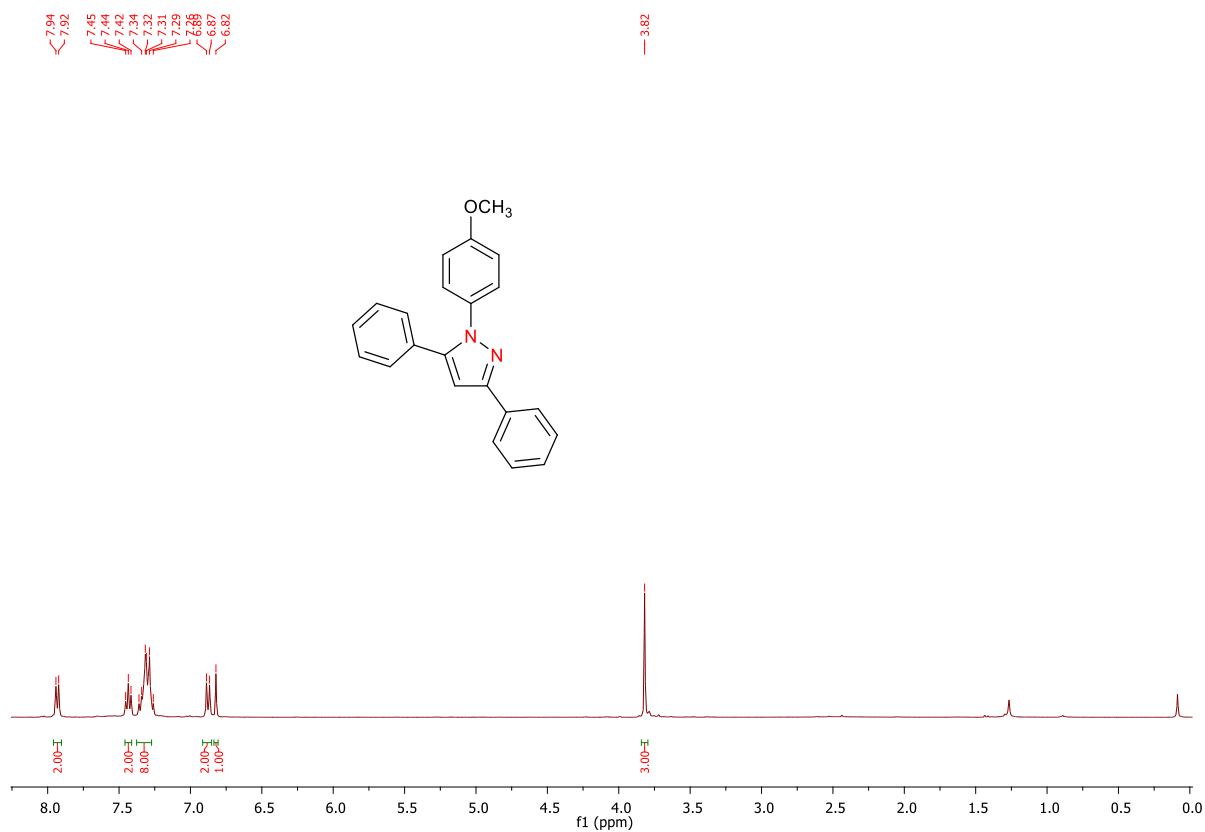

**Figure S58.** <sup>1</sup>H NMR spectrum of **9d** (400 MHz in CDCl<sub>3</sub>).

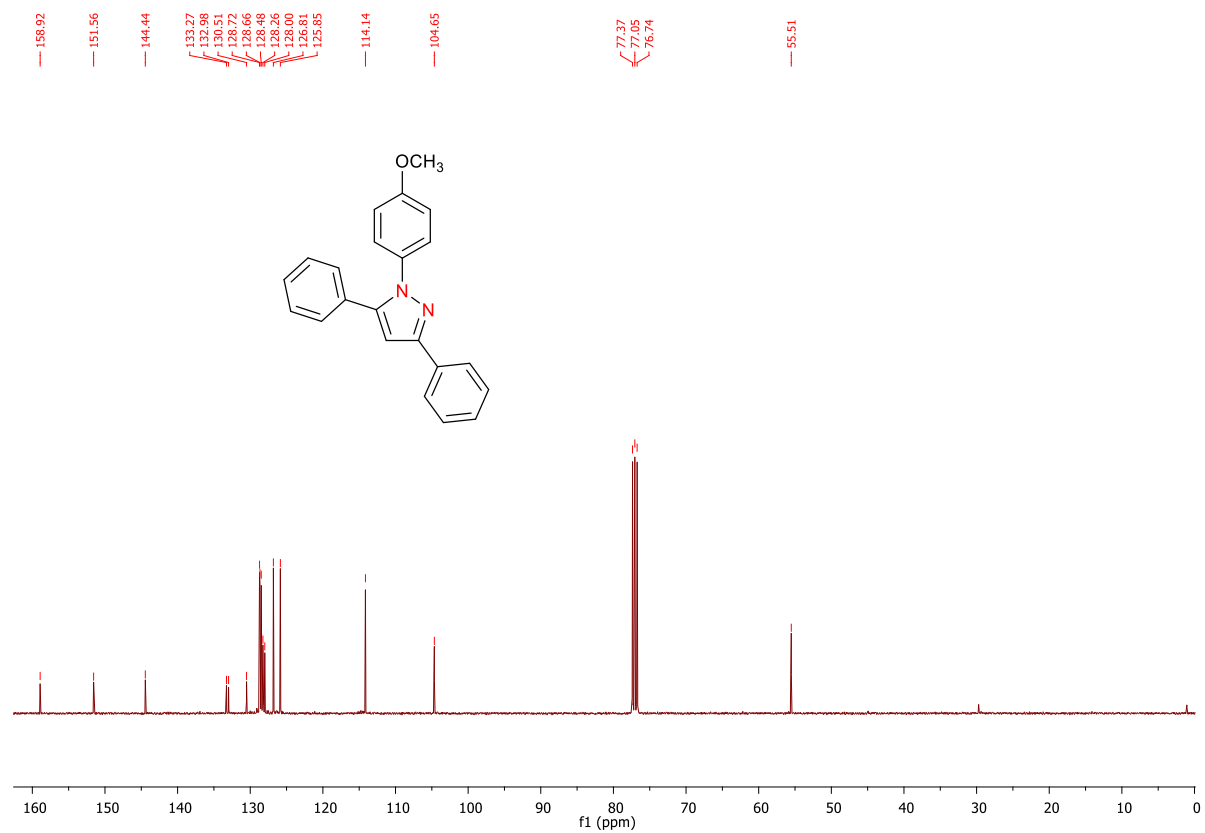

**Figure S59.** <sup>13</sup>C NMR spectrum of **9d** (100 MHz in CDCl<sub>3</sub>).

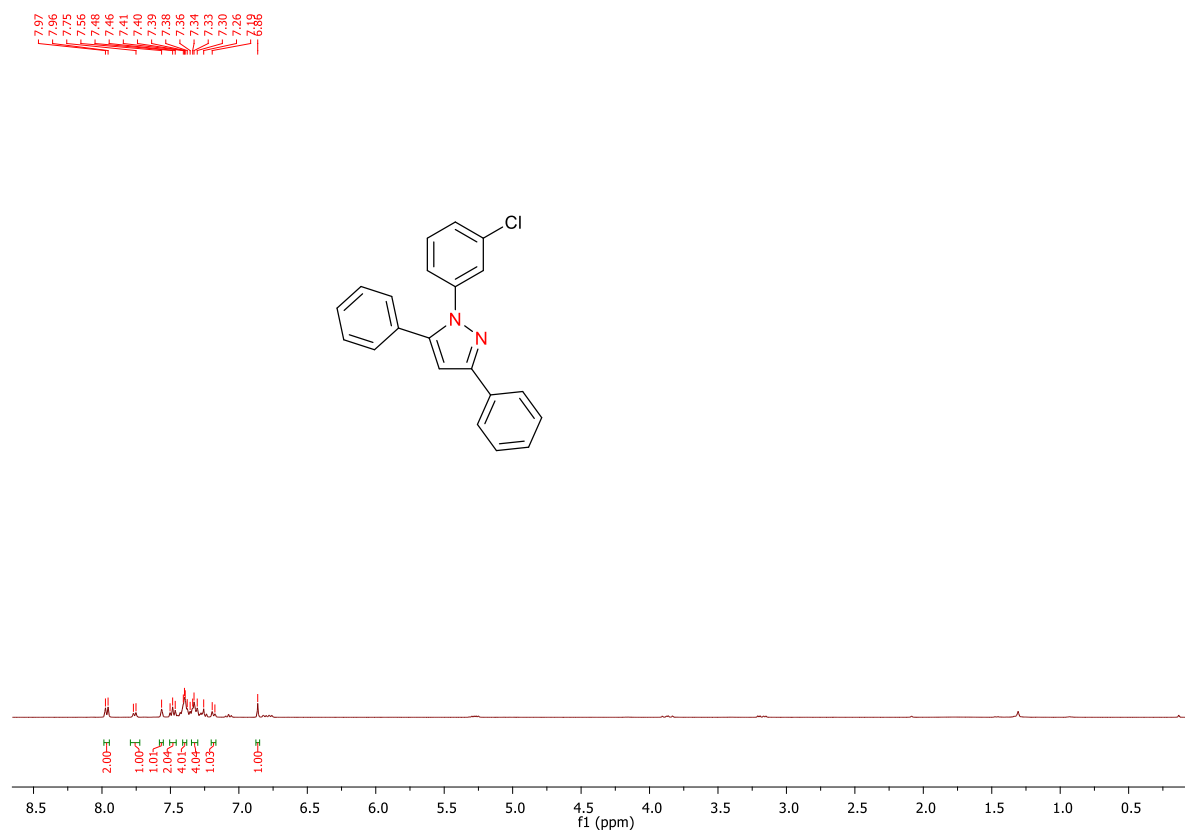

**Figure S60.** <sup>1</sup>H NMR spectrum of **9e** (400 MHz in CDCl<sub>3</sub>).

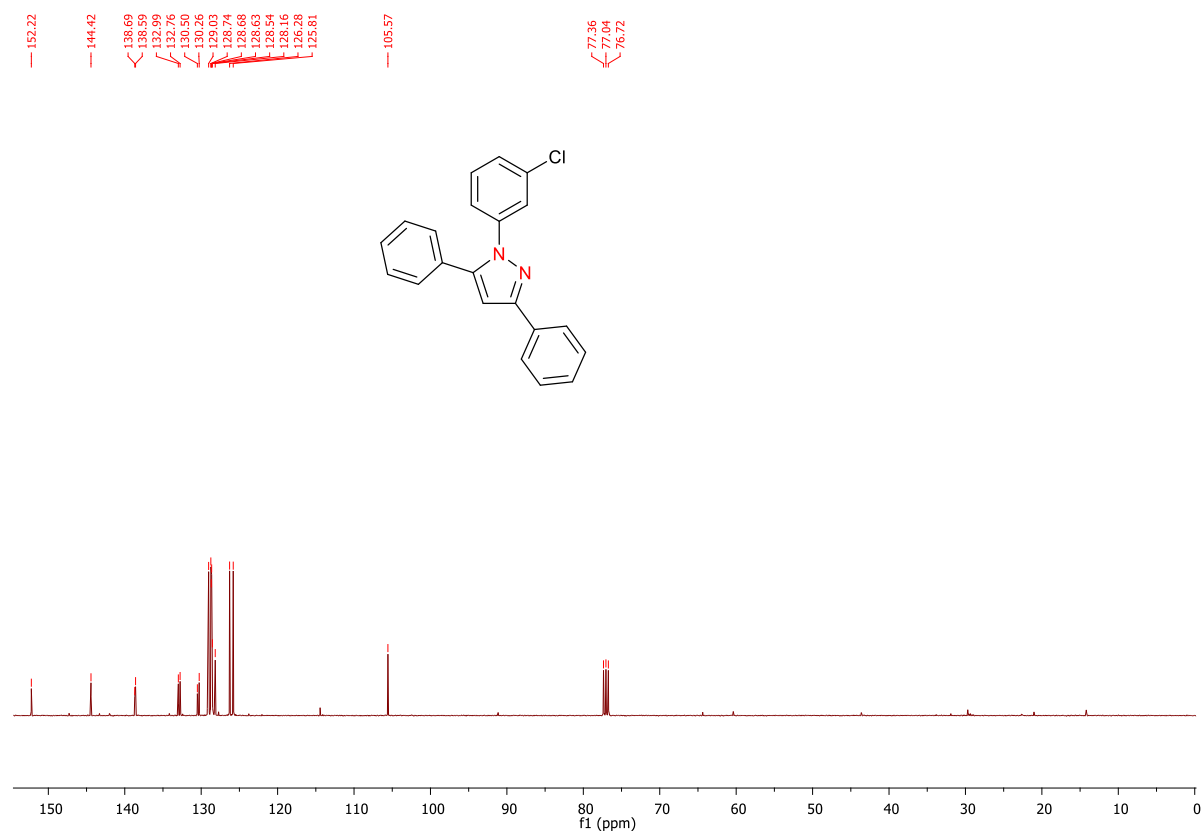

**Figure S61.** <sup>13</sup>C NMR spectrum of **9e** (100 MHz in CDCl<sub>3</sub>).

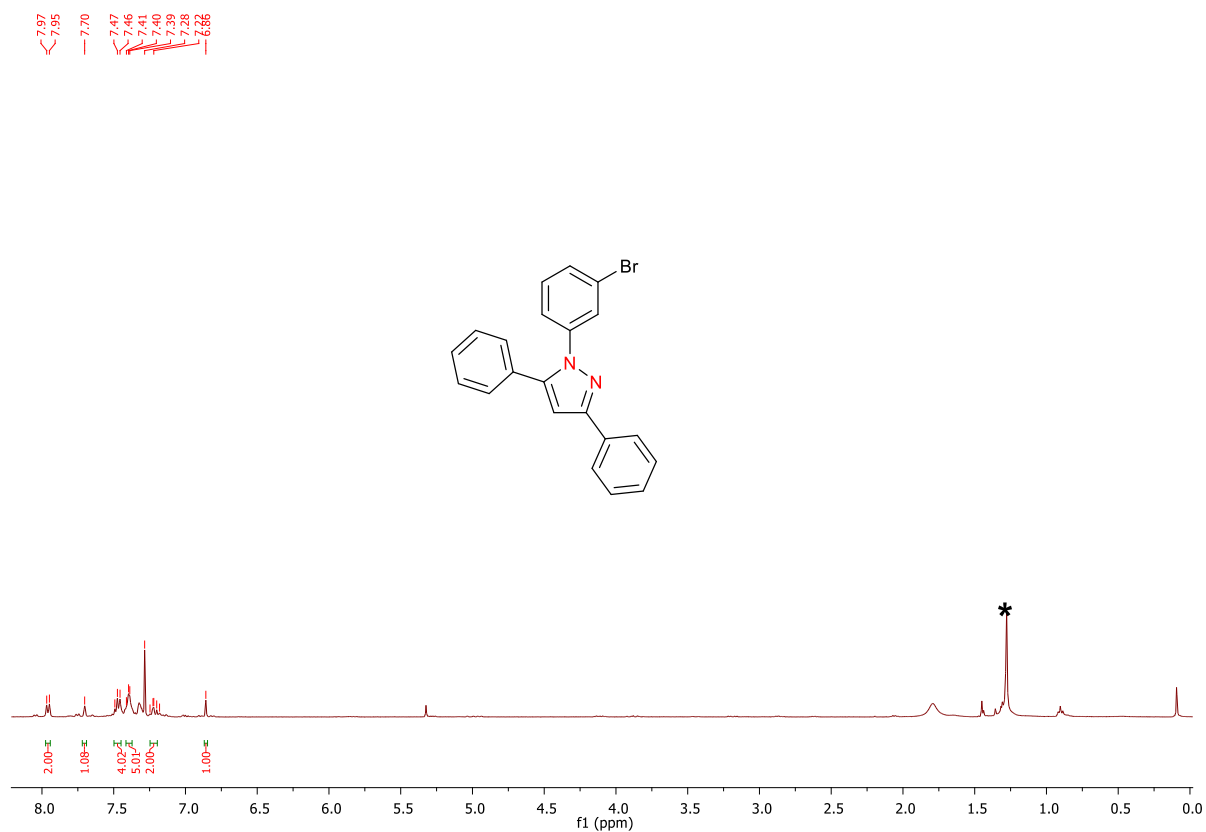

**Figure 62.** <sup>1</sup>H NMR spectrum of **9f** (400 MHz in CDCl<sub>3</sub>). (\* hexane)

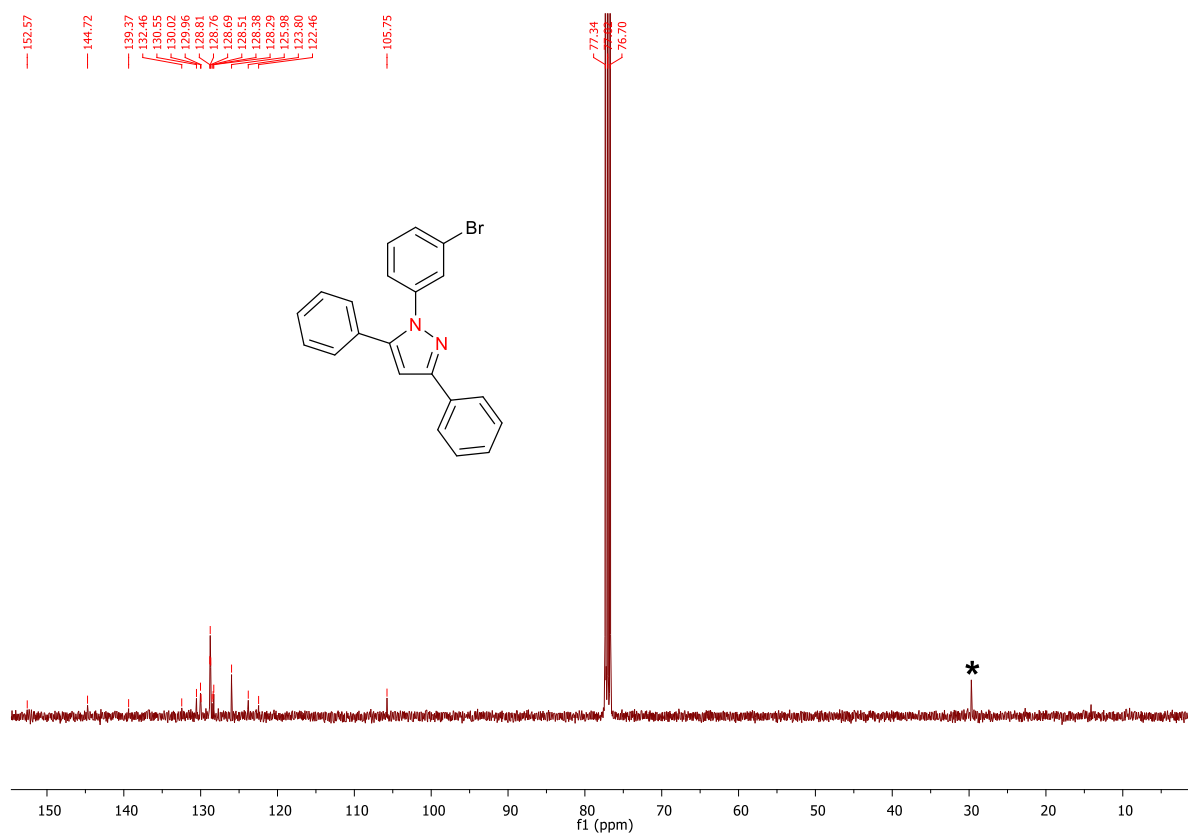

**Figure S63.** <sup>13</sup>C NMR spectrum of **9f** (100 MHz in CDCl<sub>3</sub>). (\* hexane)

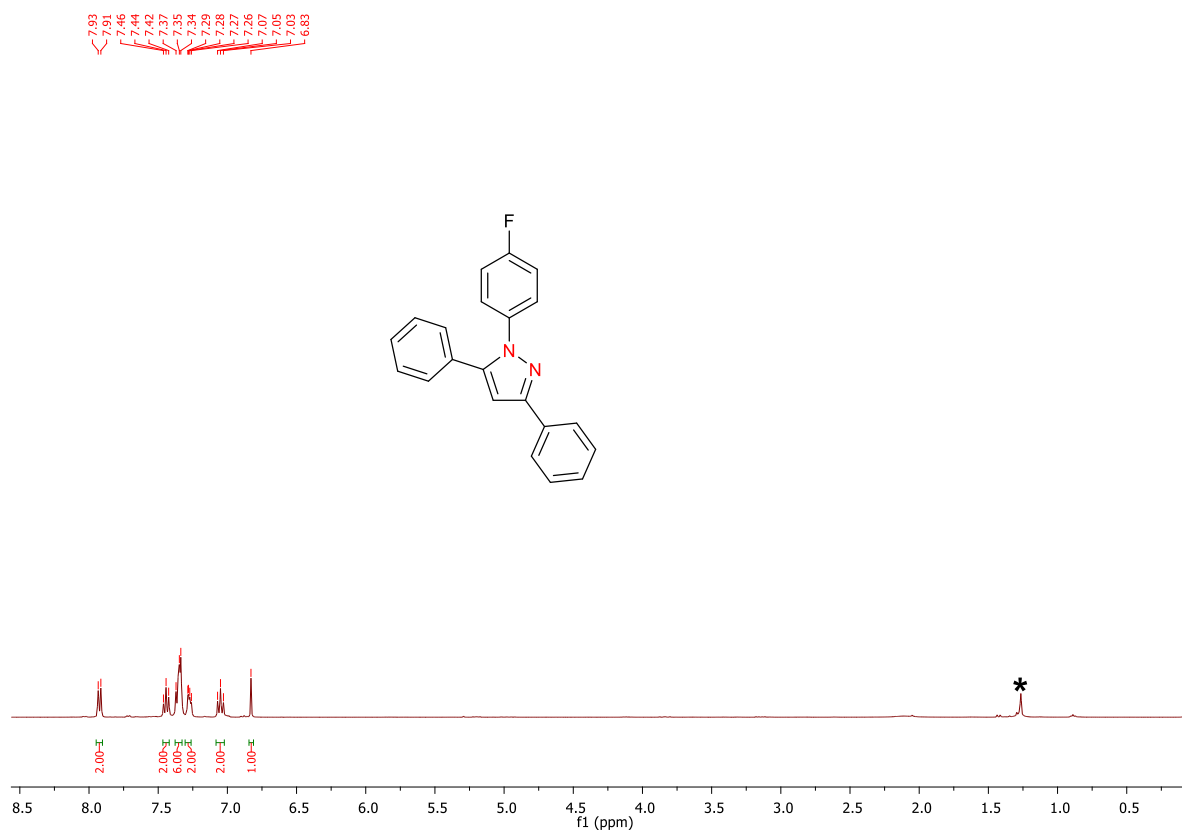

**Figure S64.** <sup>1</sup>H NMR spectrum of **9g** (400 MHz in CDCl<sub>3</sub>). (\* hexane)

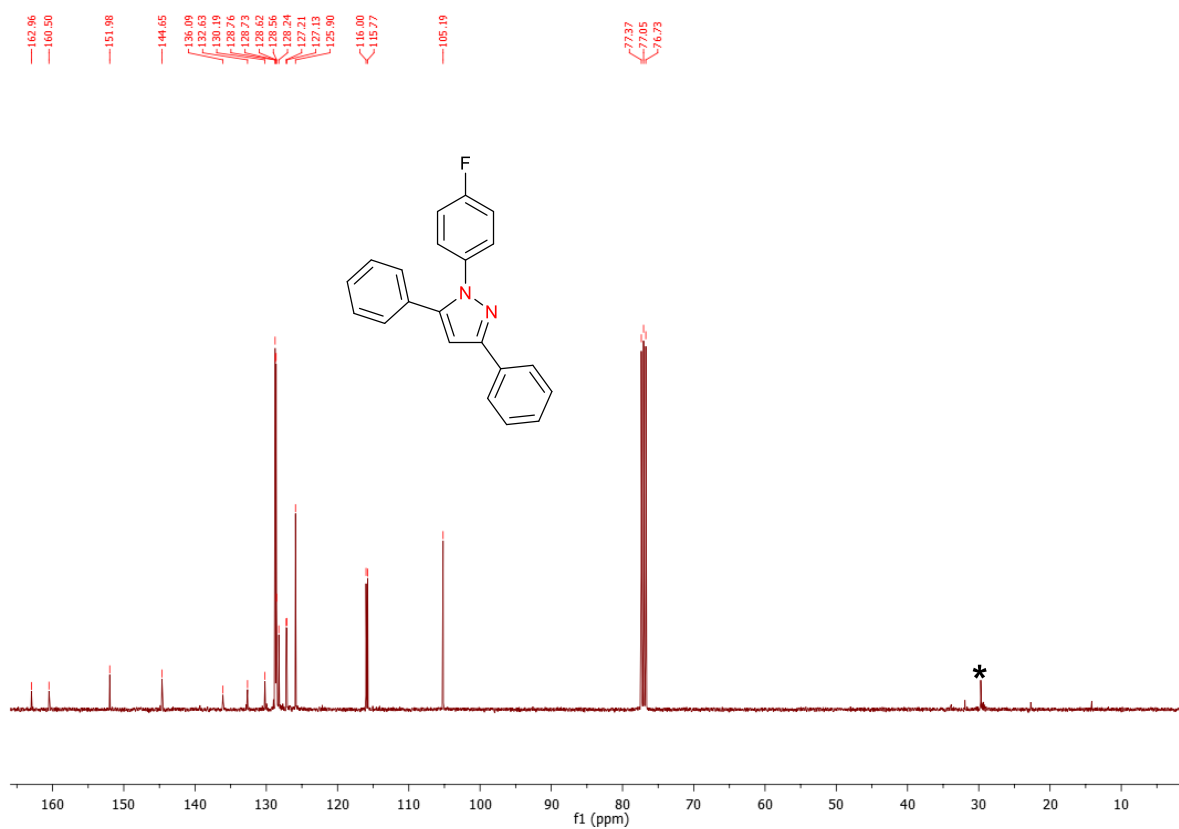

**Figure S65.** <sup>13</sup>C NMR spectrum of **9g** (100 MHz in CDCl<sub>3</sub>). (\* hexane)

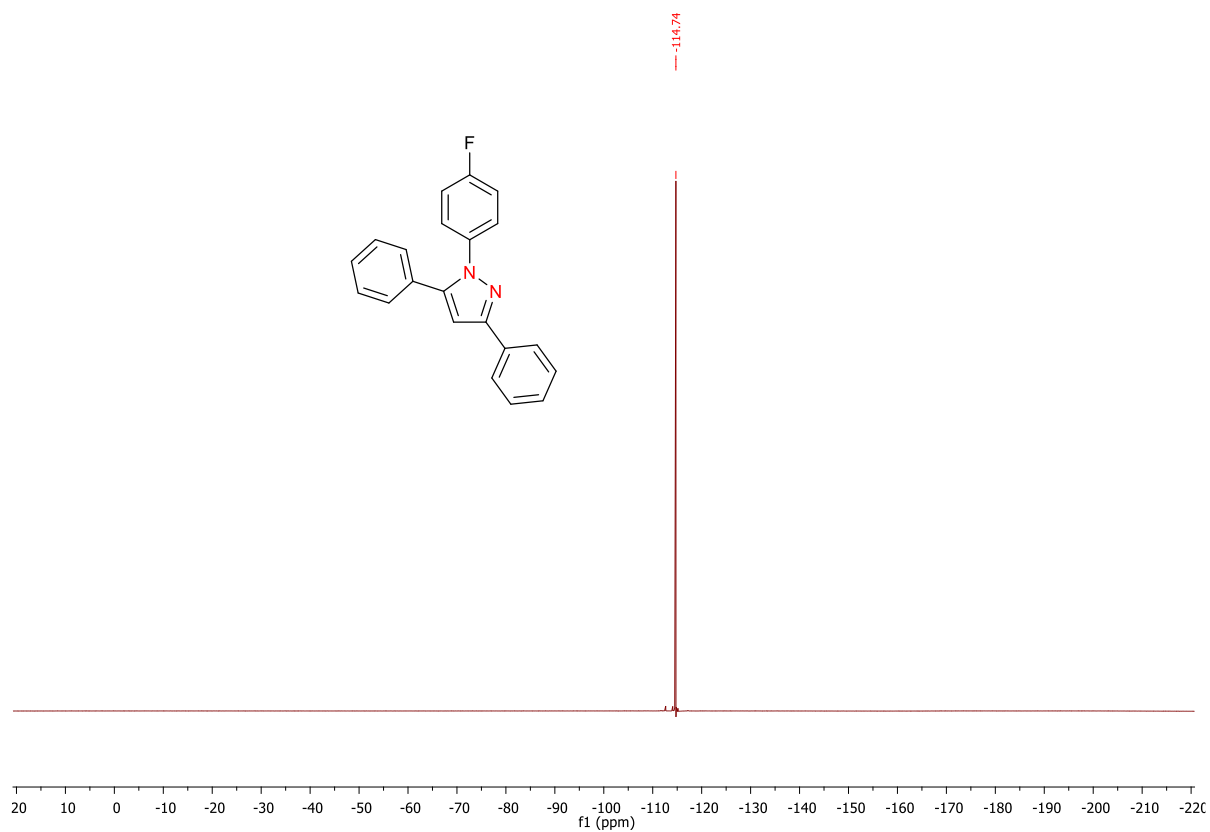

**Figure S66.**  $^{19}\text{F}$  NMR spectrum of **9g** (376 MHz in  $\text{CDCl}_3$ ).

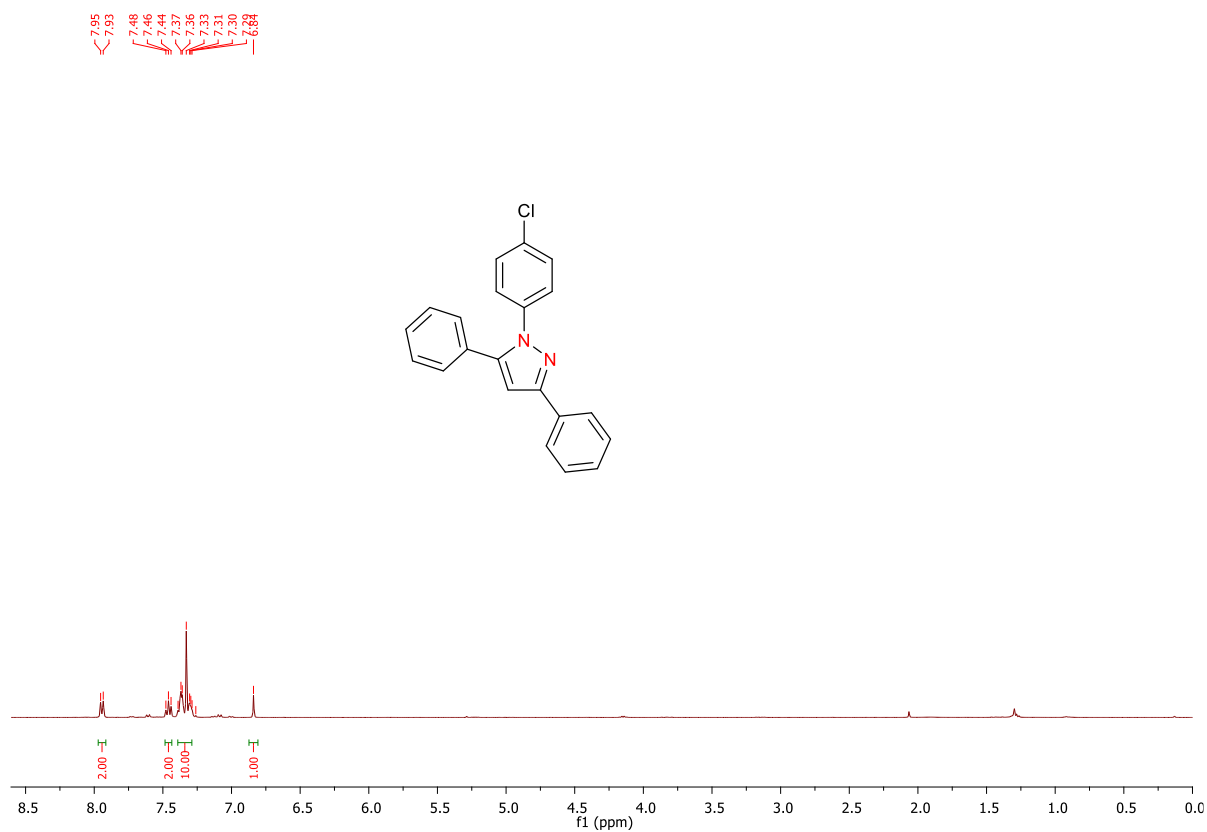

**Figure S67.** <sup>1</sup>H NMR spectrum of **9h** (400 MHz in CDCl<sub>3</sub>).

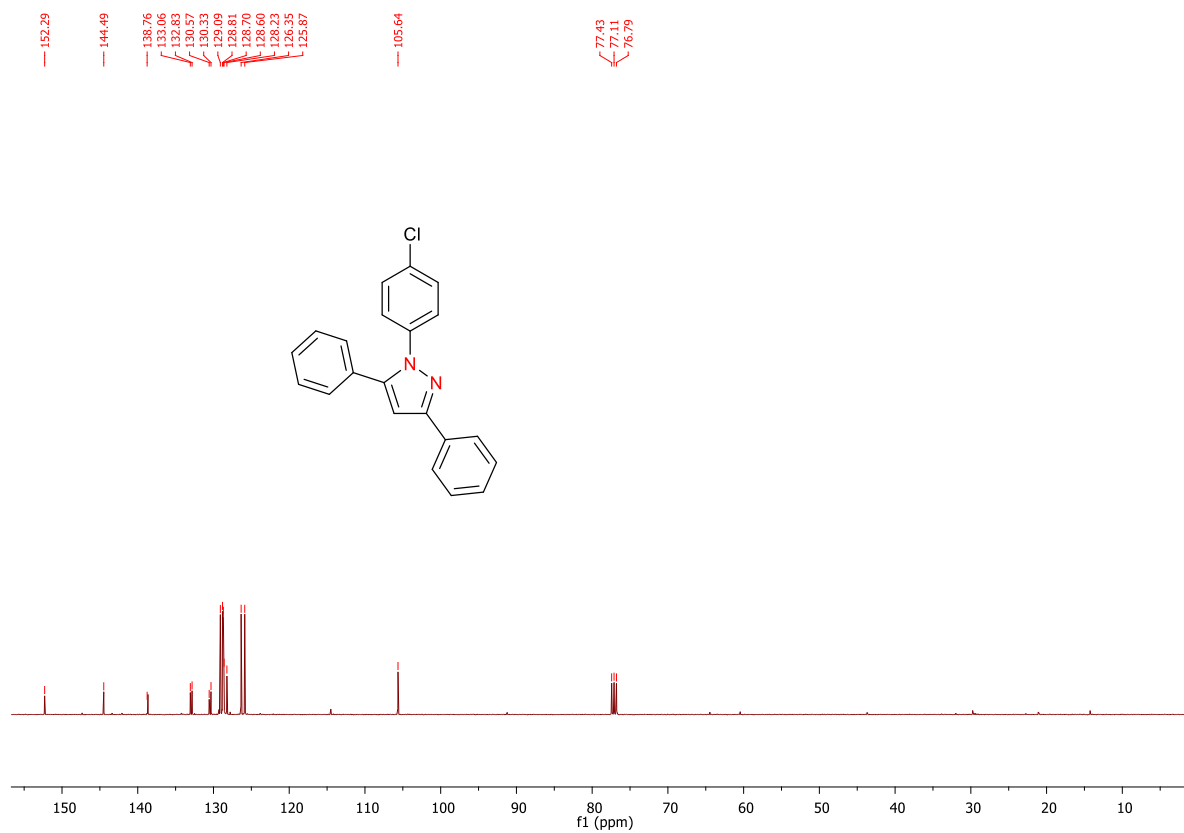

**Figure S68.** <sup>13</sup>C NMR spectrum of **9h** (100 MHz in CDCl<sub>3</sub>).



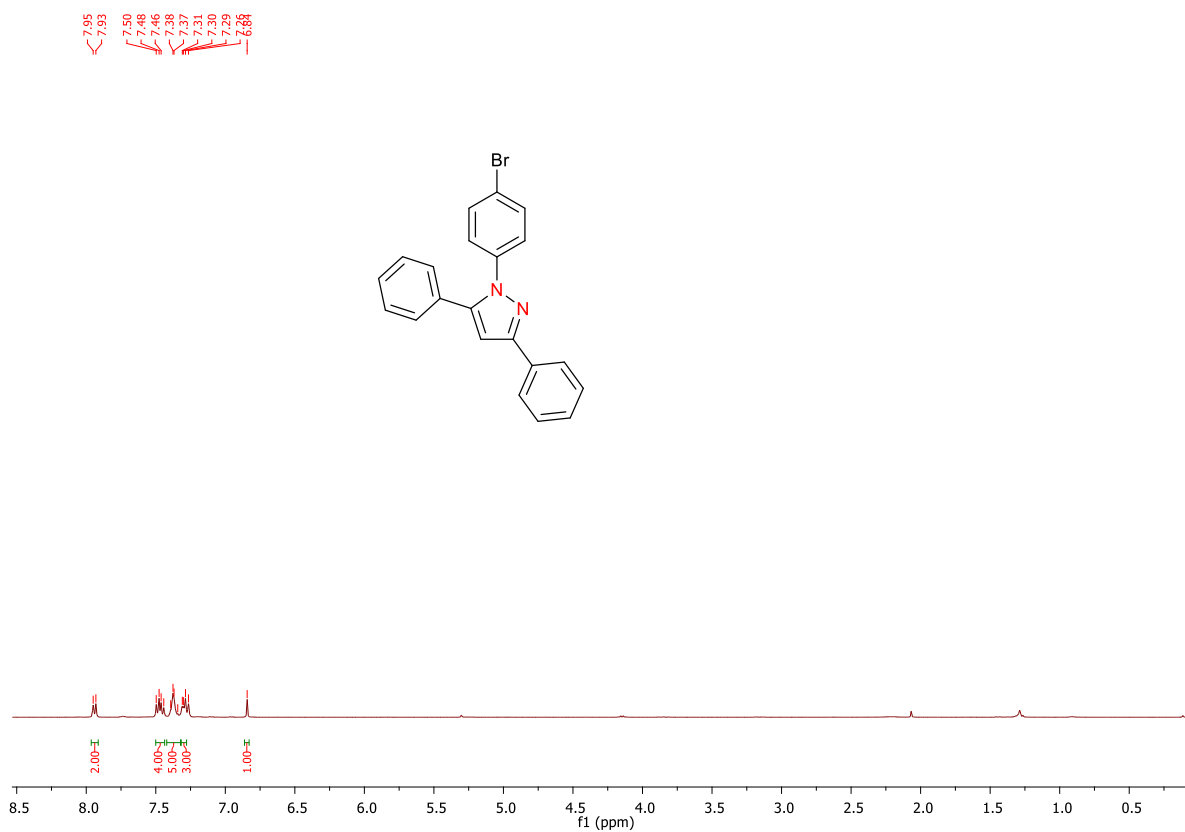

**Figure S69.** <sup>1</sup>H NMR spectrum of **9i** (400 MHz in CDCl<sub>3</sub>).

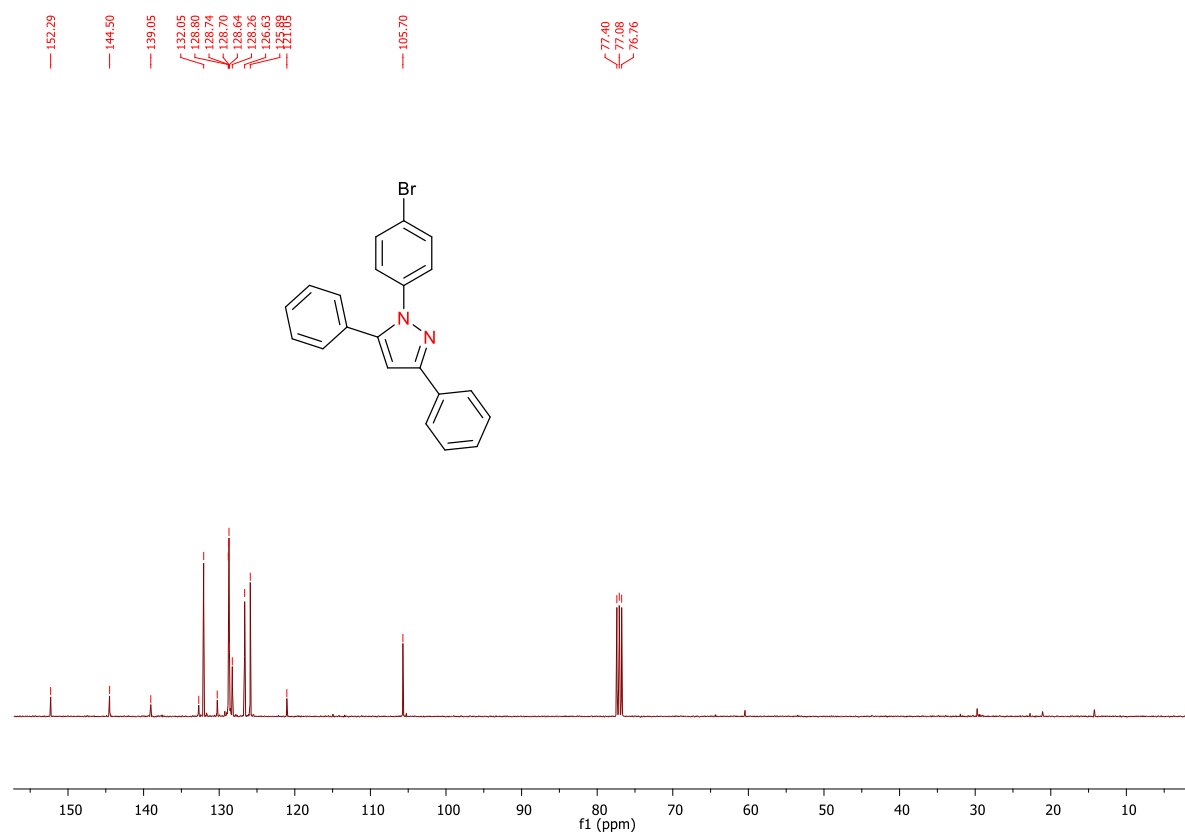

**Figure S70.** <sup>13</sup>C NMR spectrum of **9i** (100 MHz in CDCl<sub>3</sub>).

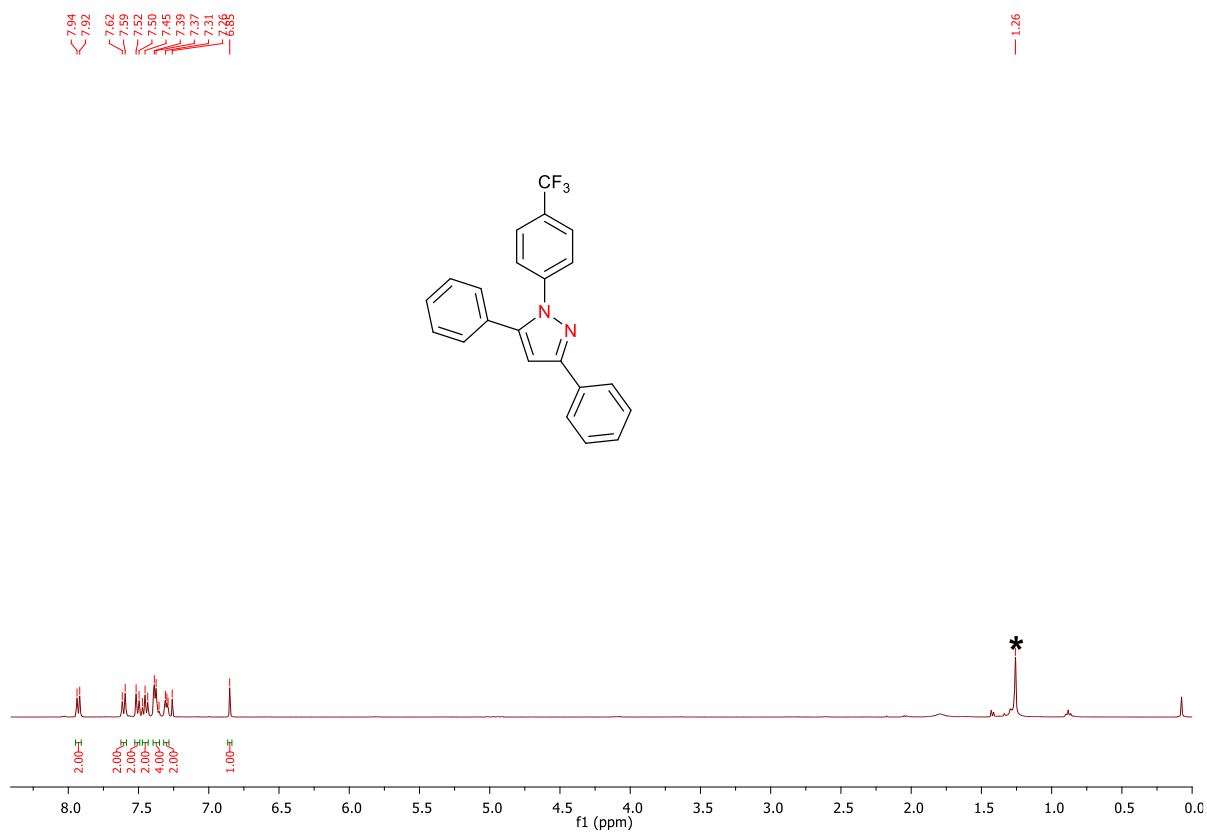

**Figure S71.** <sup>1</sup>H NMR spectrum of **9j** (400 MHz in CDCl<sub>3</sub>). (\* hexane)

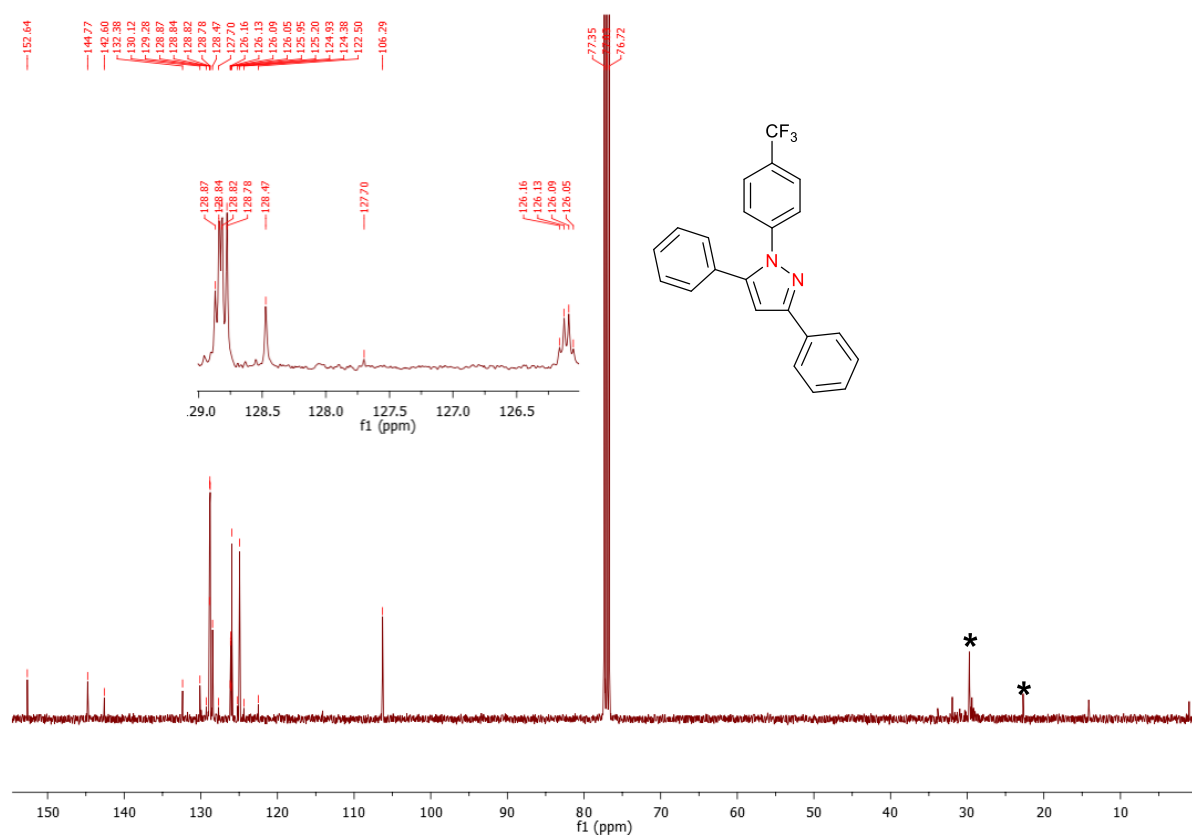

**Figure S72.** <sup>13</sup>C NMR spectrum of **9j** (100 MHz in CDCl<sub>3</sub>) (\* hexane).

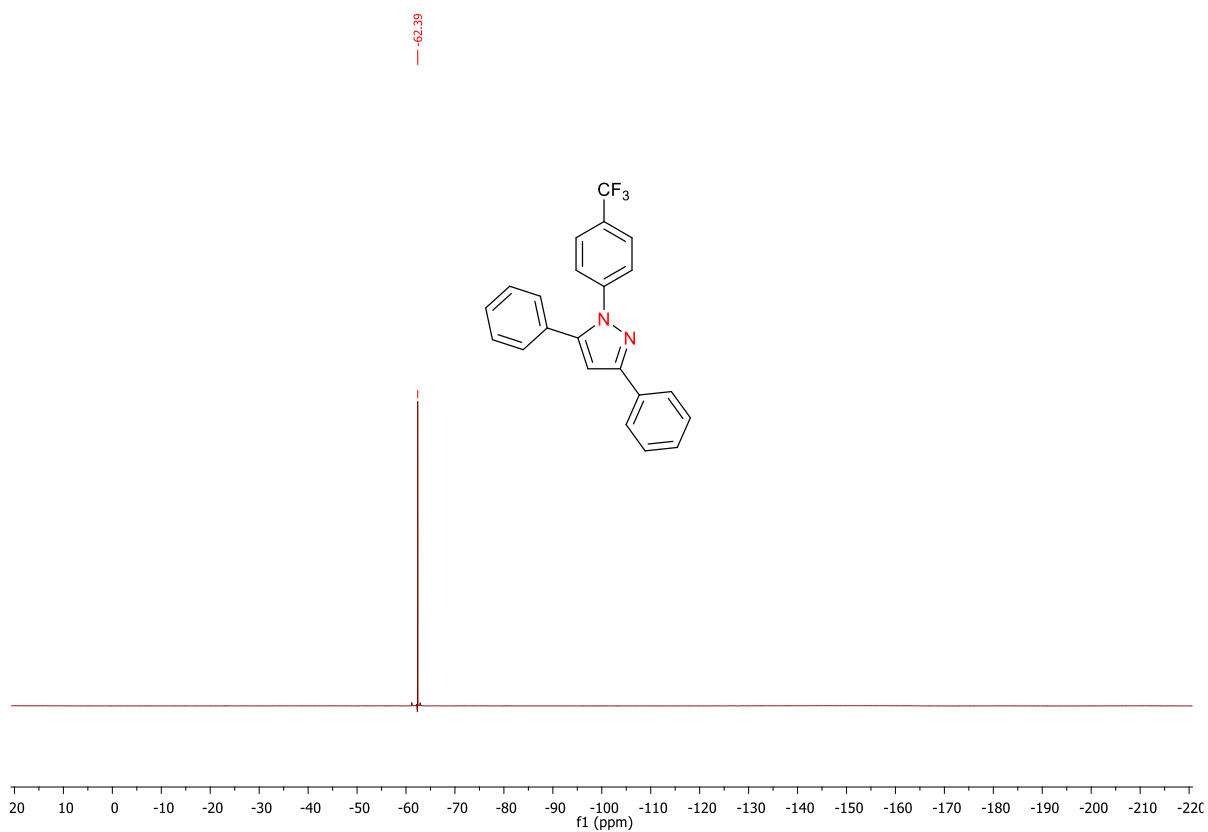

**Figure S73.**  $^{19}\text{F}$  NMR spectrum of **9j** (376 MHz in  $\text{CDCl}_3$ ).

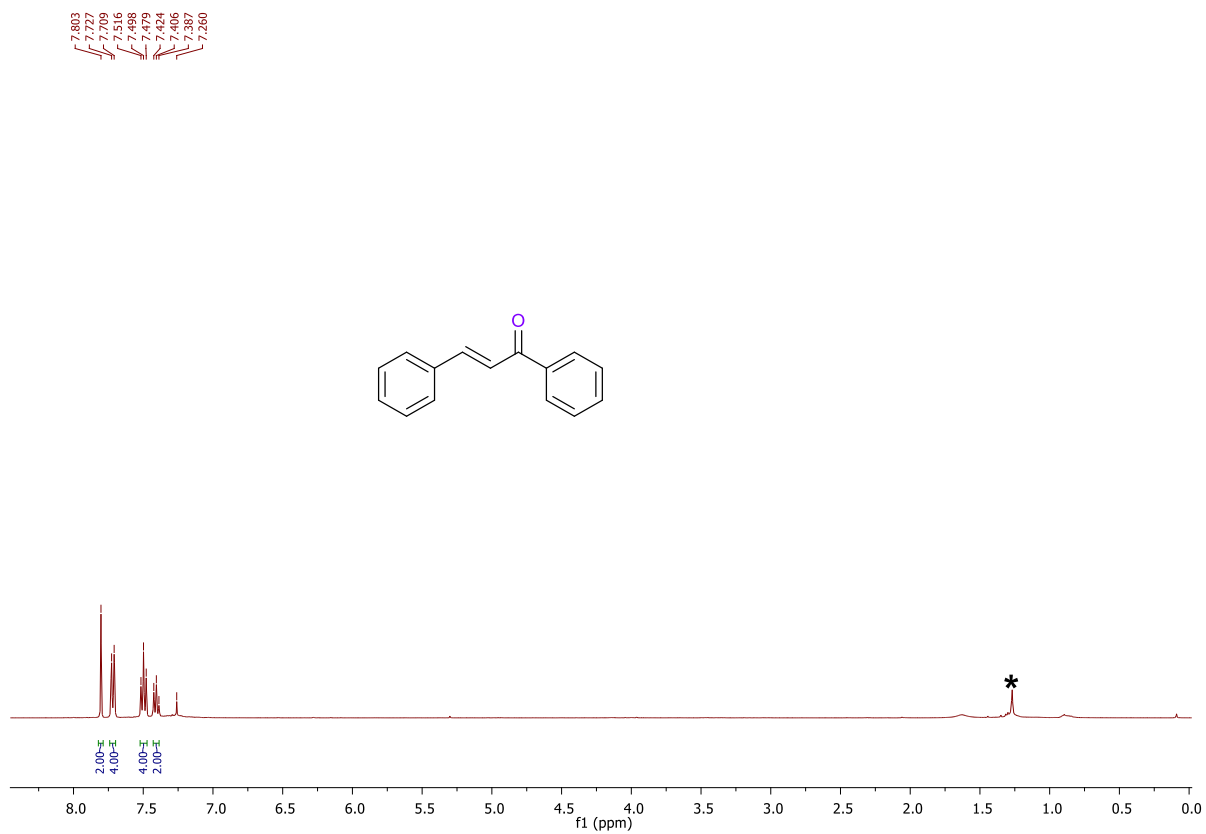

**Figure S74.** <sup>1</sup>H NMR spectrum of **10** (400 MHz in CDCl<sub>3</sub>). (\*hexane)

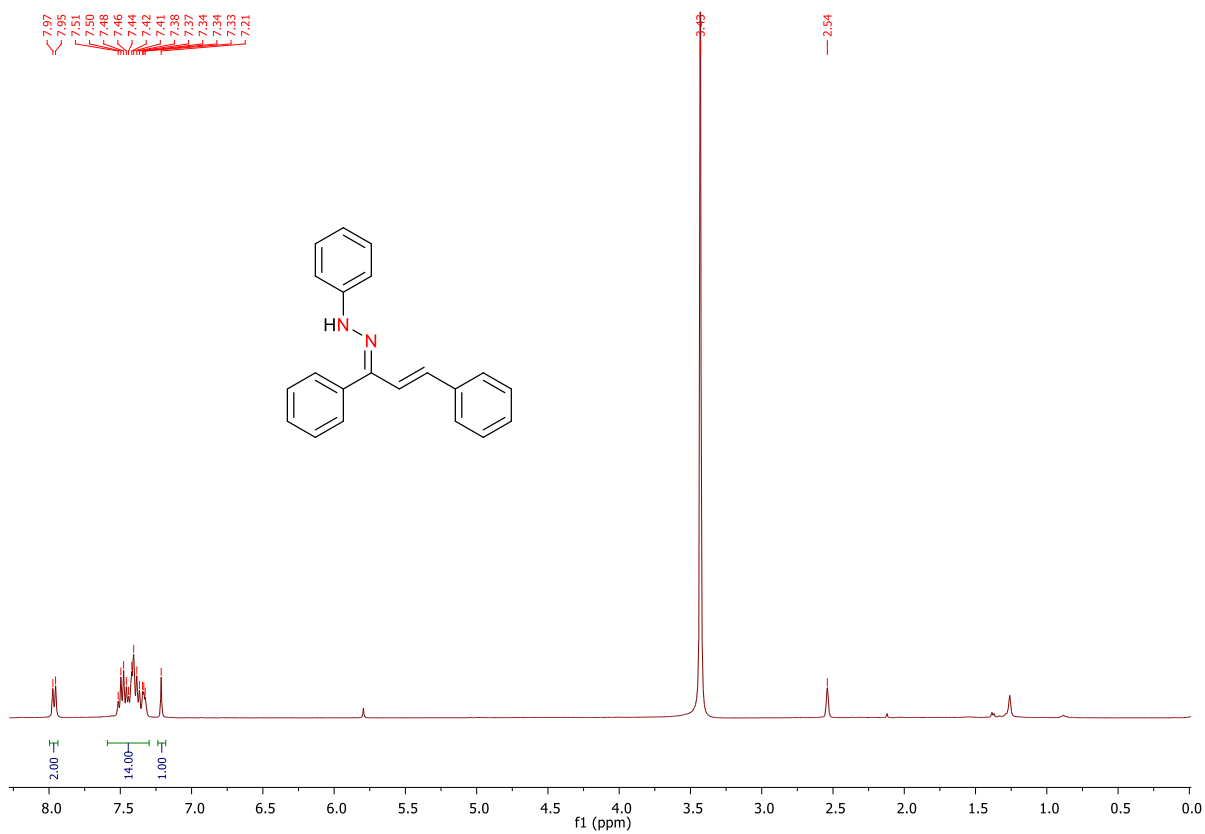

**Figure S75.** <sup>1</sup>H NMR spectrum of **11** (400 MHz in DMSO-d<sup>6</sup>).

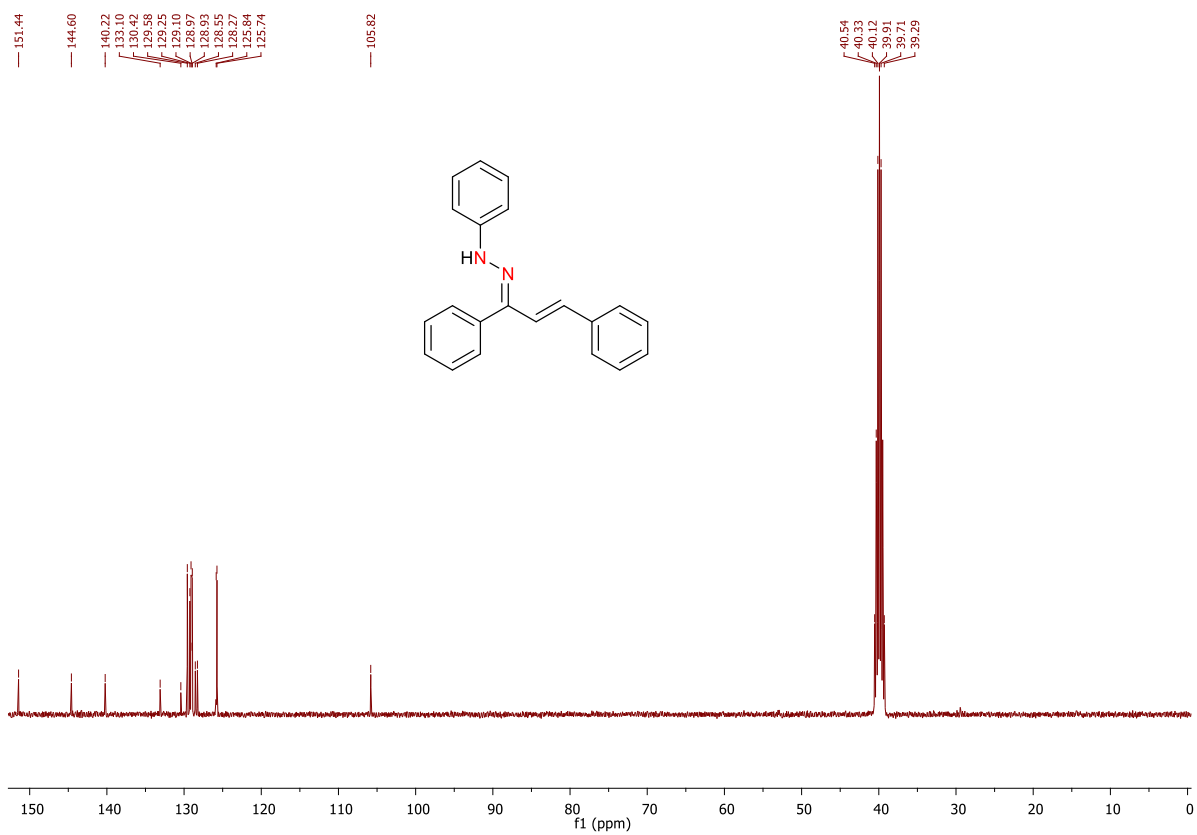

**Figure S76.** <sup>13</sup>C NMR spectrum of **11** (100 MHz in DMSO-d<sup>6</sup>).

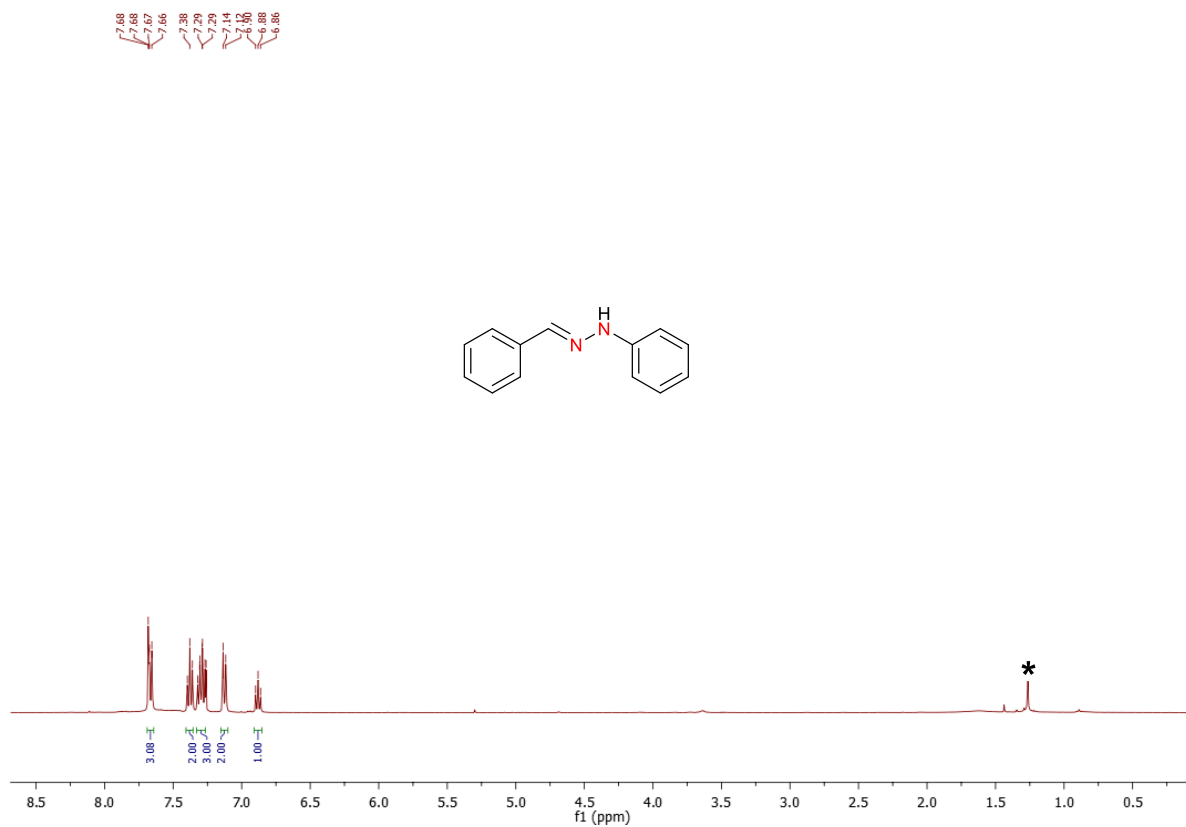

**Figure S77.** <sup>1</sup>H NMR spectrum of **12** (400 MHz in CDCl<sub>3</sub>). (\* hexane)

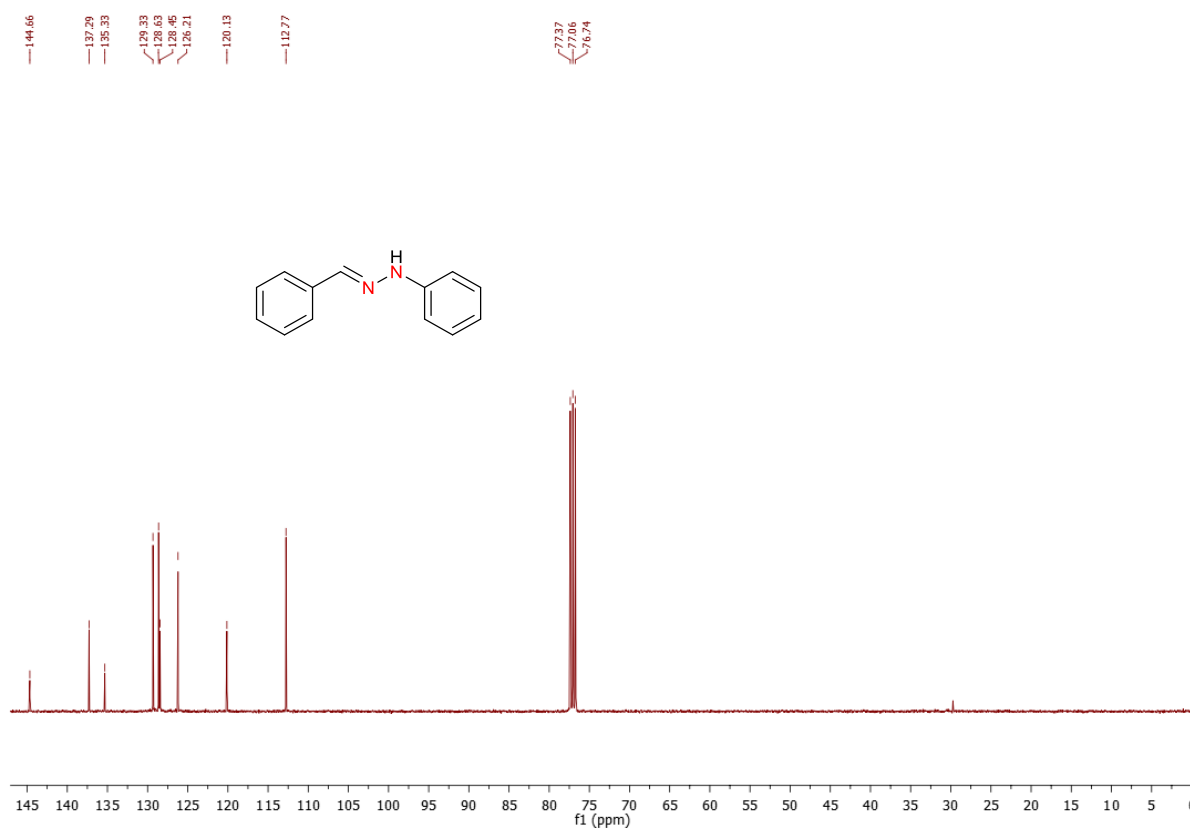

**Figure S78.** <sup>13</sup>C NMR spectrum of **12** (100 MHz in CDCl<sub>3</sub>).

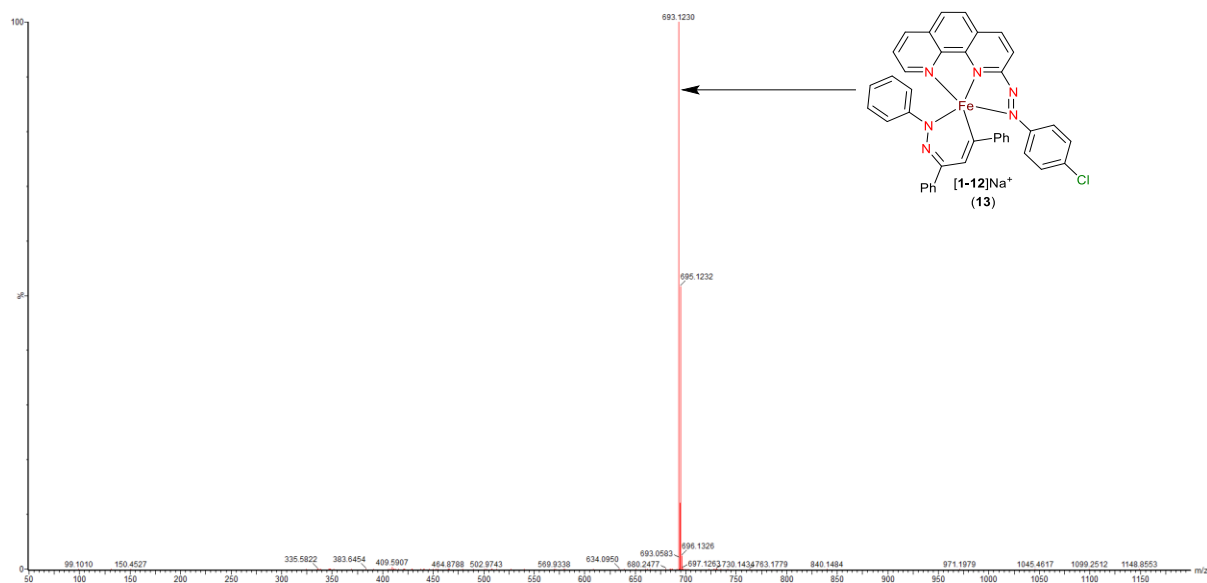

**Figure S79.** HRMS analysis of the reaction mixture for the detection of adducts **13**.

**Table S1.** Unsuccessful substrates scope.

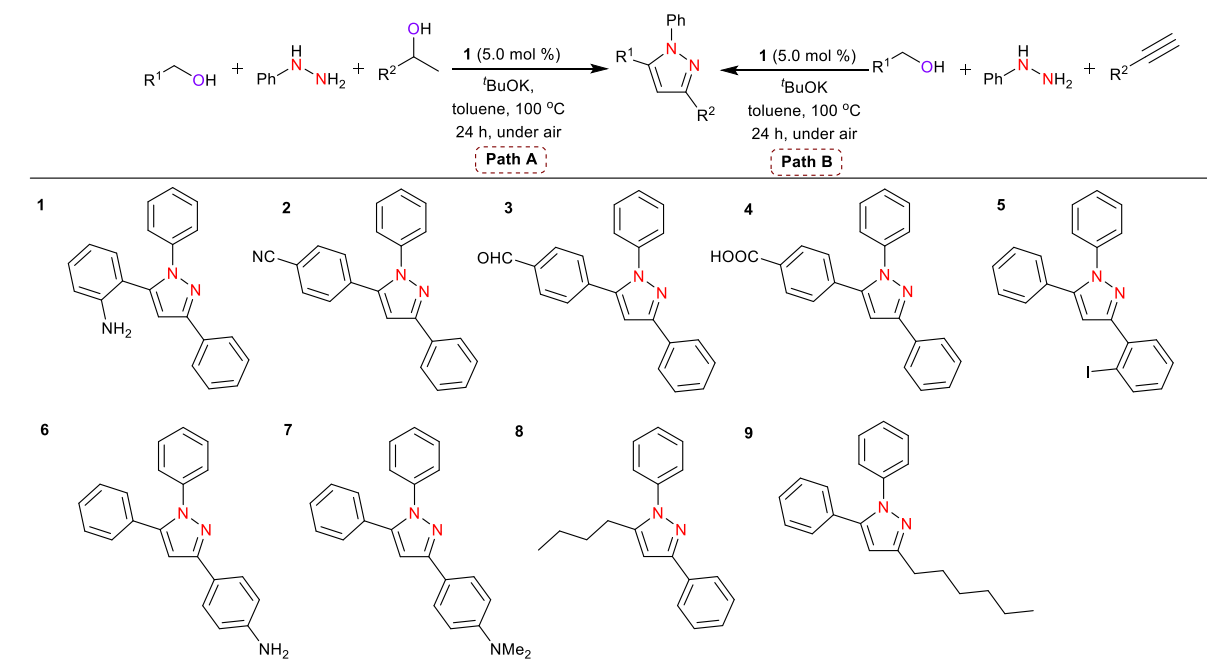

## References

1. S. Sinha, S. Das, R. Sikari, S. Parua, P. Brandaõ, S. Demeshko, F. Meyer, and N. D. Paul, Redox noninnocent azo-aromatic pincers and their iron complexes. Isolation, characterization, and catalytic alcohol oxidation, *Inorg. Chem.*, 2017, **56**, 14084–14100.
2. Y. Ding, H. Li, Y. Meng, T. Zhang, J. Li, Q-Y. Chen, and C. Zhu, Direct synthesis of hydrazones by visible light mediated aerobic oxidative cleavage of the C=C bond, *Org. Chem. Front.*, 2017, **4**, 1611–1614.
